1            **Neuromodulation of Behavioral Specialization: Tachykinin Signaling Inhibits**

2            **Task-specific Behavioral Responsiveness in Honeybee Workers**

3    Bin Han<sup>1,2</sup>, Qiaohong Wei<sup>1</sup>, Fan Wu<sup>1,3</sup>, Han Hu<sup>1</sup>, Chuan Ma<sup>1</sup>, Lifeng Meng<sup>1</sup>, Xufeng Zhang<sup>1,4</sup>,

4                            Mao Feng<sup>1</sup>, Yu Fang<sup>1</sup>, Olav Rueppell<sup>2,5\*</sup>, and Jianke Li<sup>1\*</sup>

5

6    <sup>1</sup>Institute of Apicultural Research/Key Laboratory of Pollinating Insect Biology, Ministry of

7    Agriculture, Chinese Academy of Agricultural Science, Beijing, China.

8    <sup>2</sup>Department of Biology, University of North Carolina Greensboro, Greensboro, NC, USA.

9    <sup>3</sup> Biometrology and Inspection & Quarantine, College of Life Science, China Jiliang

10    University, Hangzhou, China.

11    <sup>4</sup> Institute of Horticultural Research, Shanxi Academy of Agricultural Sciences, Shanxi

12    Agricultural University, Taiyuan, China.

13    <sup>5</sup>Department of Biological Sciences, University of Alberta, Edmonton, Canada.

14    \* Corresponding author. Email: [olav@ualberta.ca](mailto:olav@ualberta.ca), [apislijk@126.com](mailto:apislijk@126.com)

15

16 **Abstract**

17 Behavioral specialization is key to the success of social insects and often compartmentalized  
18 among colony members leading to division of labor. Response thresholds to task-specific  
19 stimuli proximally regulate behavioral specialization but their neurobiological regulation is  
20 not understood. Here, we show that response thresholds to task-relevant stimuli correspond to  
21 the specialization of three behavioral phenotypes of honeybee workers. Quantitative  
22 neuropeptidome comparisons suggest two tachykinin-related peptides (TRP2 and TRP3) as  
23 candidates for the modification of these response thresholds. Based on our characterization of  
24 their receptor binding and downstream signaling, we then confirm the functional role of  
25 tachykinins: TRP2 injection and RNAi cause consistent, opposite effects on responsiveness to  
26 task-specific stimuli of each behaviorally specialized phenotype but not to stimuli that are  
27 unrelated to their tasks. Thus, our study demonstrates that TRP-signaling regulates the degree  
28 of task-specific responsiveness of specialized honeybee workers and may control the  
29 context-specificity of behavior in animals more generally.

30

## 31 **1. Introduction**

32 Behavioral responses of animals to external and internal stimuli have evolved to optimize  
33 survival and reproduction under average circumstances [1]. However, environmental and  
34 inter-individual variability commonly cause deviations from the average, resulting in  
35 selection for context-specific and condition-dependent behavior [2-4]. Evolutionary constraint  
36 [5] of behavior occurs in form of behavioral syndromes, differences among individuals that  
37 manifest across different contexts [6]. Advantages of behavioral plasticity and specificity  
38 have been documented in many systems and some neuroendocrine mechanisms have been  
39 identified [7, 8]. However, general neural mechanisms that allow the sophistication of  
40 behavioral repertoires by increasing context-specificity of behavioral responses remain  
41 insufficiently understood.

42 Behavioral modulation is particularly important in social species in which social  
43 interactions provide a high diversity of behavioral context [9, 10]. However, social evolution  
44 also allows individuals to restrict their behavioral repertoires through temporal or permanent  
45 behavioral specialization [11]. This specialization and the resulting division of labor are  
46 believed to be major contributors to the successful colony life of many social insects despite  
47 its potential costs [12]. Advanced social evolution thus allows inter-individual plasticity to  
48 replace individual behavioral plasticity and decoupling of behavioral responses may be more  
49 efficient across different individuals than within solitary individuals. Nevertheless, the  
50 principal problem of behavioral plasticity across different contexts remains the same, and  
51 social insects can be constrained in their behavioral evolution by correlated selection  
52 responses across different behaviors or castes [13, 14].

53 Behavior often occurs in response to a specific stimulus exceeding an individual's  
54 specific response threshold [15, 16]. Response thresholds depend on internal physiological  
55 states [17], particularly the concentration of neurotransmitters and neuromodulators in the  
56 central nervous system [18, 19]. Response thresholds translate the value of perceived stimuli  
57 into probabilities of behavioral responses and vary among individuals [20]. In social insects,  
58 individual variation in response thresholds is linked to division of labor [21-23] and numerous  
59 studies have characterized this link across multiple levels of biological organization [20, 24,  
60 25]. Many aspects of the division of labor in the social model *Apis mellifera* are driven by a  
61 life-long behavioral ontogeny, leading to age-polyethism [26]. Young bees perform numerous  
62 inside tasks, most prominently brood care in form of alloparental nursing behavior, before  
63 transitioning to a mix of other in-hive tasks [27]. Similar to the highly-specialized nursing  
64 stage, the final behavioral state of older bees as outside foragers is almost exclusive of other  
65 tasks [26]. Moreover, foragers often specialize on collecting only one of the principal food  
66 sources, pollen or nectar [28]. These behavioral specialists (nurses, nectar foragers, and pollen  
67 foragers) exhibit pronounced differences in their responsiveness to task-related stimuli.  
68 Responsiveness to brood pheromones peaks at typical nursing age [29]. In contrast, foragers  
69 have a lower response threshold to sugars and light than nurses [30, 31]. Among foragers,  
70 pollen specialists exhibit higher responsiveness to sucrose and pollen stimuli than nectar  
71 foragers [32, 33]. Response thresholds can be quantified based on the honeybees' reflexive  
72 extension of their proboscis in response to stimuli, such as sucrose [20]. The spontaneous  
73 proboscis extension reflex (PER) to sucrose has been expanded to other stimuli that bees  
74 spontaneously respond to [34, 35] and conditioned stimuli to which no spontaneous responses

75 occur [36].

76 Response thresholds can be modified by biogenic amines, and dopamine,  
77 5-hydroxy-tryptamine, octopamine, and tyramine have been implicated in the regulation of  
78 different behaviors of worker bees [37]. However, neuropeptides have not been studied  
79 although they are a diverse group of neurotransmitters that can also act as neurohormones on  
80 distal targets to coordinate a wide range of internal states and behavioral processes [38].  
81 Neuropeptides are intimately involved in food perception and social interaction of insects [39],  
82 two processes that are central to division of labor in social insects [40]. Neuropeptides  
83 mediate pheromonal effects on physiology [41, 42] and usually exhibit a high degree of  
84 specificity [43, 44]. Therefore, neuropeptides are prime candidates for mediating the  
85 independent adjustment of socially relevant response thresholds that mediate honeybee  
86 workers specialization and division of labor.

87 More than 100 mature neuropeptides derived from 22 protein precursors have been  
88 identified in the Western honeybee, *Apis mellifera* [45, 46]. Several neuropeptides, including  
89 allatostatin and tachykinin-related peptides (TRPs), may be involved in the control of social  
90 behavior of honeybees, such as aggression [47], foraging [48], brood care [45], and possibly a  
91 wide array of other behaviors [49]. However, these results are based on correlations between  
92 behavior and neuropeptide expression and more detailed studies are needed to understand the  
93 causal roles of neuropeptides in the behavioral specialization among honeybee workers. Here,  
94 we report the results of a comprehensive study to test the hypothesis that neuropeptides  
95 regulate the division of labor in honeybees. We initially compared response thresholds to  
96 task-relevant stimuli among behaviorally-defined worker groups of two honeybee species.

97 These response thresholds were correlated with neuropeptide expression levels, especially  
 98 TRPs, suggesting a role of TRPs in worker specialization. Based on these results, we  
 99 characterized the TRP signaling pathway molecularly. Finally, we demonstrated in a series of  
 100 TRP injections and RNAi-mediated knockdown of the *TRP* and its receptor *TRPR* a causal  
 101 role of this pathway in modulating different response thresholds in a task-specific manner.

## 102 2. Results

### 103 2.1 The task-specific responsiveness of worker bees shows significant variations between 104 behavioral phenotypes and the two honeybee species

105 In our comparisons of the PER of worker bees to task-specific stimuli, including sucrose  
 106 solution, pollen, and larva, significant differences were found between behavioral phenotypes  
 107 and the two honeybee species (Fig. 1A, Table S1 and S2).

108

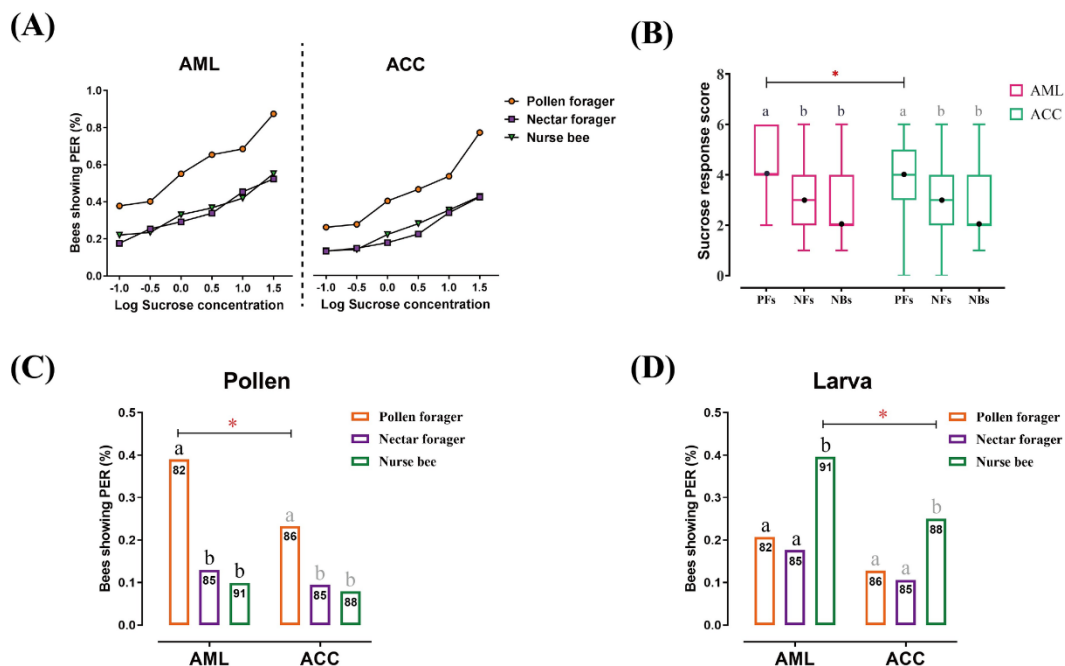

109  
 110 **Fig. 1: Responses to sucrose solution, pollen, and larva stimulations are significant different**  
 111 **among behavioral phenotypes and between honeybee species.** (A) The proportion of pollen foragers  
 112 (PFs), nectar foragers (NFs), and nurse bees (NBs) showing a proboscis extension reflex (PER)

113 increased with increasing concentrations of sucrose solutions. Left: *Apis mellifera ligustica* (AML),  
114 right: *Apis cerana cerana* (ACC). Details of the statistical results of our comparisons of sucrose  
115 responsiveness between behavioral phenotypes and bee species are listed in Table S2. (B) Median  
116 sucrose response scores (SRS; intermediate lines) and quartiles (upper and lower lines) of PFs, NFs,  
117 and NBs. Kruskal-Wallis tests with Bonferroni correction were used to compare the SRSs of the three  
118 behavioral phenotypes in the same species and significant differences are denoted by letters at  $p < 0.05$ .  
119 Pairwise Mann-Whitney U tests were used for comparing the same phenotype between two honeybee  
120 species (\* denotes  $p < 0.05$ ). (C) Proportion of PFs, NFs, and NBs showing PER to pollen stimulation  
121 of their antennae. (D) Proportion of PFs, NFs, and NBs showing PER to antennal stimulation with  
122 larvae. Numbers in bars represent the number of individuals sampled in each group. Independent  
123 Chi-square tests were used to compare the responsiveness to pollen or larvae between species (\*  
124 denotes  $p < 0.05$ ) and among behavioral phenotypes within species (letters indicate significant  
125 difference at  $p < 0.05$ ).

126 The percentage of bees showing a PER increased with sucrose concentration across all  
127 experimental groups (Fig. 1A). In both, AML and ACC, the sucrose response scores (SRSs)  
128 of PFs were higher than the SRSs of NFs (AML:  $Z = 7.0$ ,  $p = <0.001$ ; ACC:  $Z = 6.1$ ,  $p <$   
129  $0.001$ ) and NBs (AML:  $Z = 5.9$ ,  $p < 0.001$ ; ACC:  $Z = 5.2$ ,  $p < 0.001$ ), while no significant  
130 difference between NFs and NBs was observed in either species. PFs were more responsive  
131 than NFs and NBs to all sucrose concentrations. The species comparison between AML and  
132 ACC showed significant higher sucrose responsiveness in PFs of AML than in PFs of ACC  
133 ( $Z = 2.361$ ,  $p = 0.018$ ), specifically at sucrose concentrations of 0.3% ( $\chi^2 = 4.1$ ,  $p = 0.042$ ), 1.0%  
134 ( $\chi^2 = 5.2$ ,  $p = 0.001$ ), 3.0% ( $\chi^2 = 8.4$ ,  $p = 0.023$ ), and 10.0% ( $\chi^2 = 5.3$ ,  $p = 0.021$ ). Nectar  
135 foragers of AML and ACC showed no significant difference in overall SRS, but NFs of AML  
136 were more responsive than NFs of ACC at sucrose concentrations of 0.3% ( $\chi^2 = 4.5$ ,  $p =$   
137  $0.035$ ), 1.0% ( $\chi^2 = 4.5$ ,  $p = 0.033$ ), and 3.0% ( $\chi^2 = 4.0$ ,  $p = 0.046$ ). There was no significant  
138 difference between NBs of AML and ACC in sucrose responsiveness.

139 In AML, PFs were more responsive to pollen stimulation than NFs ( $\chi^2 = 14.9$ ,  $p = 0.002$ )  
140 and NBs ( $\chi^2 = 20.2$ ,  $p < 0.001$ ), while there were no significantly statistical differences

141 between NFs and NBs. Likewise, PFs of ACC were more sensitive than NFs ( $\chi^2 = 6.0$ ,  $p =$   
142 0.015) and NBs ( $\chi^2 = 7.8$ ,  $p = 0.001$ ) without a statistically significant difference between NFs  
143 and NBs. Pollen foragers of AML showed a significant higher pollen responsiveness than of  
144 ACC ( $\chi^2 = 4.9$ ,  $p = 0.031$ ), with no significant species differences in NFs and NBs (Fig. 1B).

145 In larva responsiveness assay, NBs of AML showed increased responsiveness to larva  
146 stimulation compared to PFs ( $\chi^2 = 7.2$ ,  $p = 0.006$ ) and NFs ( $\chi^2 = 10.3$ ,  $p = 0.001$ ). Likewise,  
147 NBs of ACC were more sensitive than PFs ( $\chi^2 = 4.2$ ,  $p = 0.013$ ) and NFs ( $\chi^2 = 6.1$ ,  $p = 0.002$ ).  
148 Nurse bees of AML were significantly more sensitive to larvae ( $\chi^2 = 4.3$ ,  $p = 0.027$ ) than NBs  
149 of ACC, with no significant species differences in PFs and NFs. (Fig. 1C).

## 150 **2.2 Quantitative peptidomics reveal brain neuropeptide signatures of behavior**

151 Our LC-MS/MS-based comparisons of the brain neuropeptidomes of NBs, PFs, and NFs of  
152 AML and ACC revealed numerous differences among experimental groups but only two  
153 tachykinins showed consistent patterns relating to the task-specific responsiveness of the  
154 experimental groups. Overall, 132 unique neuropeptides derived from 23 neuropeptide  
155 families were identified in the brain of AML worker bees (Table S3). In the brain of ACC  
156 worker bees, for the first time, 116 unique neuropeptides derived from 22 neuropeptide  
157 families were identified (Table S4).

158 Quantitative comparison among the three behavioral phenotypes of AML showed that 40  
159 neuropeptides derived from 16 neuropeptide families were differentially expressed the brain  
160 (Fig. 2, Table S5). Among 19 differential expressed neuropeptides between PFs and NFs, 9  
161 neuropeptides were upregulated in PFs and 10 were upregulated in NFs. Among 24  
162 differential expressed neuropeptides between PFs and NBs, 18 were upregulated in PFs and 6



163 were upregulated in NBs. Moreover, 21 differential expressed neuropeptides were found

164 between NFs and NBs, with 14 upregulated in PFs and 7 upregulated in NBs.

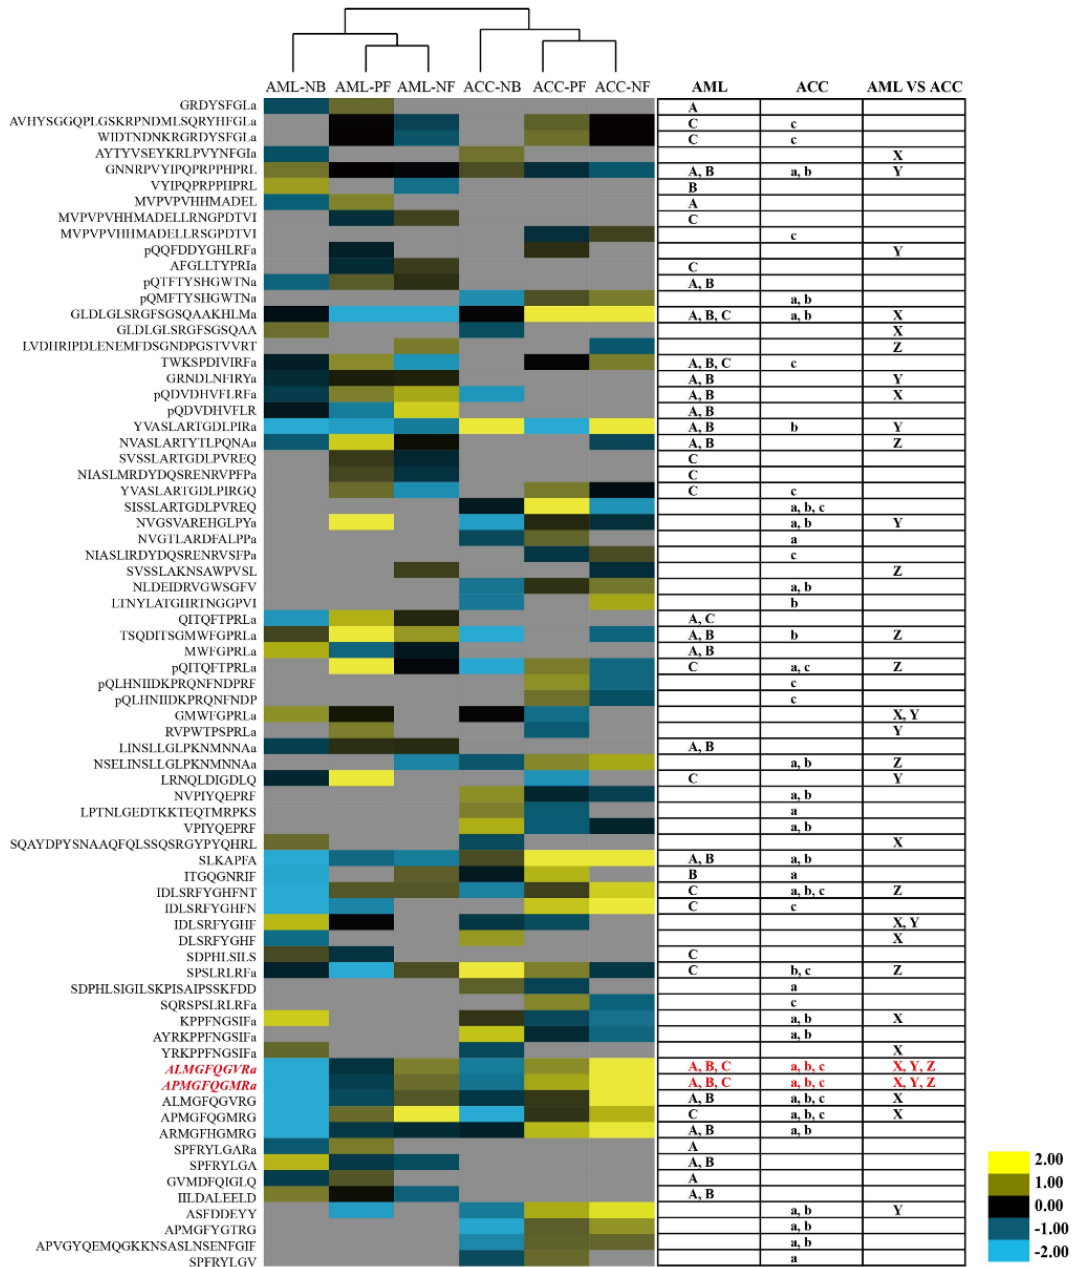

165

166 **Fig. 2: Quantitative comparison of the brain neuropeptides.** The brain neuropeptides were  
 167 quantitatively compared between nurse bees (NBs), pollen foragers (PFs), and nectar foragers (NFs) of  
 168 *Apis mellifera ligustica* (AML) and *Apis cerana cerana* (ACC). The up- and down-regulated peptides  
 169 are indicated by yellow and blue colors, respectively. Color intensity indicates the relative expressional  
 170 level, as noted in the key. Letters A, B, and C on the right represent significant differences between  
 171 NBs and PFs, NBs and NFs, and PFs and NFs in AML, respectively; a, b, and c represent significant  
 172 differences between NBs and PFs, NBs and NFs, and PFs and NFs in ACC, respectively; X, Y, and Z

173 represent significant differences of NBs, PFs, and NFs between AML and ACC, respectively. For  
174 detailed quantification data, see Table S5 S6, and S7.

175 In ACC 18 neuropeptides were differentially expressed between PFs and NFs, with 9  
176 upregulated in each group. Between PFs and NBs, 27 neuropeptides showed different  
177 expression levels: 20 were upregulated in PFs and 7 were upregulated in NBs (Table S6).  
178 Twenty-five neuropeptides were differentially expressed between NFs and NBs, with 19  
179 upregulated in NFs and 6 in NBs. The species comparison between AML and ACC, the  
180 number of differentially expressed neuropeptides in NBs, PFs and NFs was 13, 10, and 11, of  
181 which 7, 6, and 6 were upregulated in AML respectively (Table S7).

### 182 **2.3 TRP/TRPR signaling couples to $G_{\alpha q}$ and $G_{\alpha s}$ pathways and triggers the ERK cascade**

183 A series of cellular and molecular experiments confirmed that honeybee TRPR was expressed  
184 in the cell membrane and specifically activated by TRP, triggering intracellular cAMP  
185 accumulation,  $Ca^{2+}$  mobilization, and ERK phosphorylation by dually coupling  $G_{\alpha s}$  and  $G_{\alpha q}$   
186 signaling pathways.

187 The honeybee *TRPR* gene was successfully cloned and expressed in the human  
188 embryonic kidney cells (HEK293) and the insect *Spodoptera frugiperda* pupal ovary cells  
189 (Sf21). Significant cell surface expression was observed by fluorescence microscopy (Fig. 3A  
190 and 3B), revealing that the honeybee TRPR was exclusively localized in the cell membrane in  
191 HEK293 and Sf21 cells.

192 Competitive binding assays with labeled TRP2 and TRP3 confirmed high affinity of the  
193 TRPR for both. The observed  $IC_{50}$  values for TRP2 and TRP3 were 2.34 nM and 6.29 nM in  
194 HEK293 cells and 8.76 nM and 34.88 nM in Sf21 cells, respectively (Fig. 3C and 3D). These

195 competition binding analyses strongly suggested a direct binding of TRP to TRPR, and also  
196 indicated that TRP2 displayed a higher affinity than TRP3 to TRPR.

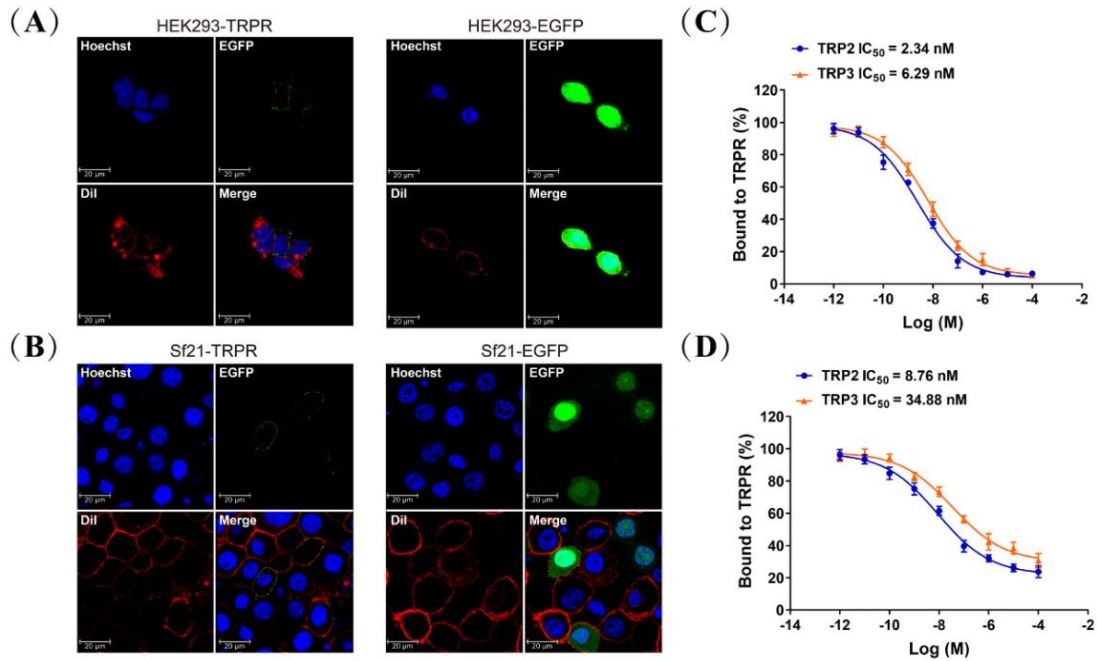

197  
198 **Fig. 3: Expression of TRPR and direct interaction of TRPs with TRPR in cell culture.** (A) and (B)  
199 HEK293 and Sf21 cells expressing TRPR-EGFP and EGFP (green) were stained with a membrane  
200 plasma probe DiI (red) and a nuclei probe Hoechst (blue), and assessed by confocal microscopy. (C)  
201 and (D) Competitive inhibition of TAMRA-TRP2 and TAMRA-TRP3 binding to TRPR in HEK293  
202 and Sf21 cells, and all data are presented as mean  $\pm$  s.e.m. from three independent experiments.

203 The detected accumulation of intracellular cAMP concentration only in HEK293 cells  
204 transformed with TRPR (Fig. 4A) confirmed that TRP2 and TRP3 can activate TRPR and  
205 trigger cAMP signaling. This effect was confirmed in a second experiment and compared to  
206 other neuropeptides, including short neuropeptide F (NPF), pigment spreading hormone  
207 (PSH), and corazonin (CRZ), which did not induce any detectable responses in both HEK293  
208 cells (Fig. 4B) and Sf21 cells (Fig. 4C).

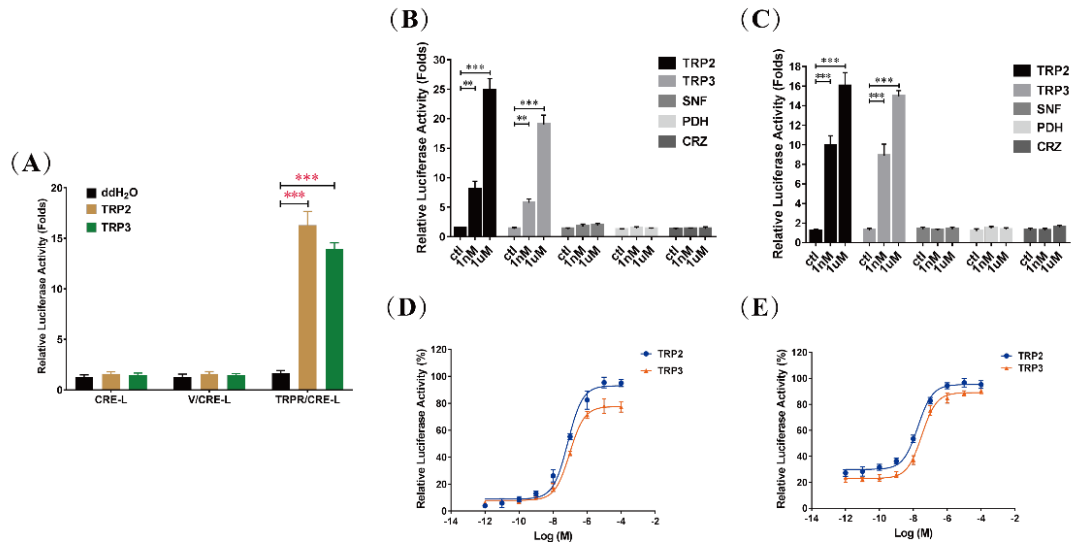

209

210 **Fig. 4: TRP/TRPR-mediated cAMP accumulation in cells.** (A), Luciferase activity of HEK293 cells  
 211 transfected with the reporter gene pCRE-Luc (CRE-L), and co-transfected with pFLAG-TRPR (TRPR)  
 212 or vehicle vector (V) were determined in response to ddH<sub>2</sub>O and TRP (TRP2 or TRP3, 1 μM) treatment.  
 213 TRP-dependent TRPR activation increases cAMP levels more than 10-fold. Luciferase activity of  
 214 HEK293 cells (B) and Sf21 cells (C) co-transfected with TRPR and CRE-L were determined in  
 215 response to different neuropeptides (TRP2, TRP3, short neuropeptide F (SNF), pigment-dispersing  
 216 hormone (PDH), and corazonin (CRZ)) at different concentrations (1 nM or 1 μM). Increase of cAMP  
 217 was specific to TRP2 and TRP3. Dose-dependent changes of luciferase activities, indicating cAMP  
 218 increases, in HEK293 cells (D) and Sf21 cells (E) co-transfected with TRPR and CRE-L revealed  
 219 typical kinetics in response to TRP2 and TRP3. All data are presented as mean ± s.e.m. from three  
 220 independent experiments. Student's t-tests were used for pairwise comparisons (\*\*p<0.01,  
 221 \*\*\*p<0.001).

222 Additional dose-dependent assays of TRP2 and TRP3 on cAMP accumulation in both  
 223 HEK293 cells (Fig. 4D) and Sf21 cells (Fig. 4E) confirmed the direct correlation between  
 224 TRP stimulation and cAMP signaling, and indicated that TRPR was more sensitive to TRP2  
 225 than to TRP3. Further analysis showed that pretreatment with PTX (an inhibitor of G<sub>ai</sub>  
 226 subunit) had no effect on cAMP accumulation, whereas stimulation with CTX (an activator of  
 227 G<sub>os</sub> subunit) elicited a dramatically increase in abundance of cAMP (Fig. 5A), suggesting that  
 228 G<sub>os</sub> was involved in TRPR-mediated cAMP signaling. In addition, TRP-induced cAMP  
 229 generation was significantly inhibited by G<sub>aq</sub> inhibitor YM-254890, and PKA inhibitor H89

230 (Fig. 5B). Collectively, these results established that both  $G_{\alpha s}$  and  $G_{\alpha q}$  are involved in  
231 TRP/TRPR-mediated cAMP signaling.

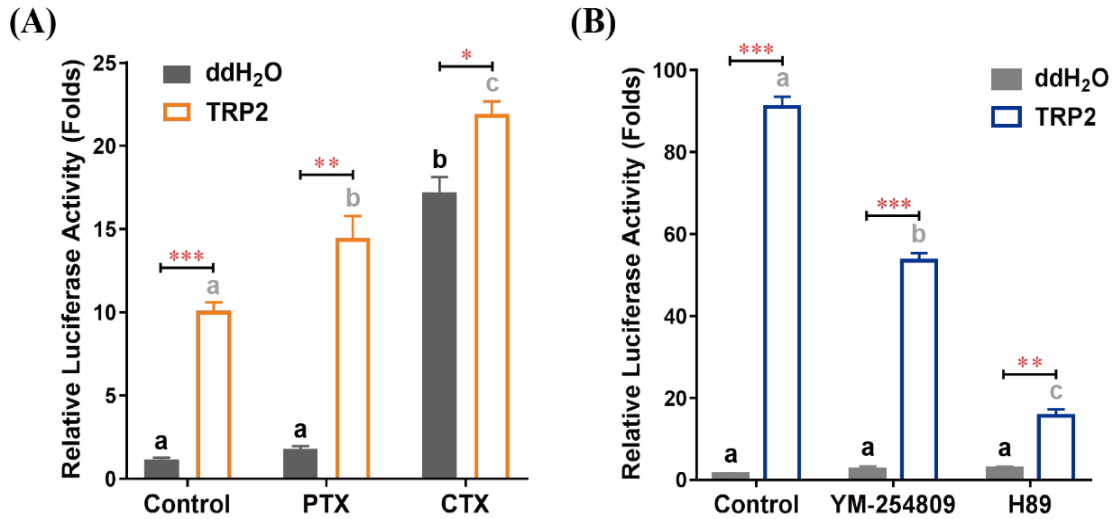

232  
233 **Fig. 5: TRP/TRPR signaling induces cAMP accumulation via  $G_{\alpha q}$  and  $G_{\alpha s}$  pathways.** (A), Effects  
234 of  $G_{\alpha i}$  inhibitor pertussis toxin (PTX) and  $G_{\alpha s}$  activator cholera toxin (CTX) on TRP2-mediated  
235 stimulation of cAMP accumulation. HEK293 cells expressing TRPR were pretreated with PTX (100  
236 ng/ml) or CTX (300 ng/ml) overnight prior to treatment with TRP2 (1  $\mu$ M). (B), Effects of  $G_{\alpha q}$   
237 inhibitor YM-254890 and PKA inhibitor H89 on TRP2-mediated stimulation of cAMP accumulation.  
238 HEK293 cells expressing TRPR were pretreated with YM-254890 (1  $\mu$ M) or H89 (10  $\mu$ M) for 2 hours  
239 prior to treatment with TRP2 (1  $\mu$ M). All data are presented as mean  $\pm$  s.e.m. from three independent  
240 experiments. Student's t-tests were used for pairwise comparisons between water and TRP2 treatments  
241 (\*:  $p < 0.05$ , \*\*:  $p < 0.01$ , \*\*\*:  $p < 0.001$ ). One-way ANOVAs followed by Tukey's post-hoc tests were  
242 used for comparisons among control, PTX, and CTX groups within water or TRP2 treatments, and  
243 significant differences ( $p < 0.05$ ) are denoted by letters.

244 Measurements of a  $Ca^{2+}$ -sensitive fluorescent indicator suggested that intracellular  $Ca^{2+}$   
245 signaling was also elicited by TRP/TRPR signaling. Both, TRP2 and TRP3, could induce a  
246 rapid intracellular  $Ca^{2+}$  accumulation in HEK293 cells (Fig. 6A) and Sf21 cells (Fig. 6B). The  
247 TRP/TRPR-mediated intracellular  $Ca^{2+}$  mobilization was decreased by  $G_{\alpha q}$  inhibitor  
248 YM-254890 and phospholipase C (PLC) inhibitor U73122 (Fig. 6C), suggesting the  $G_{\alpha q}$ /PLC  
249 pathway was involved in TRP/TRPR-mediated  $Ca^{2+}$  signaling.

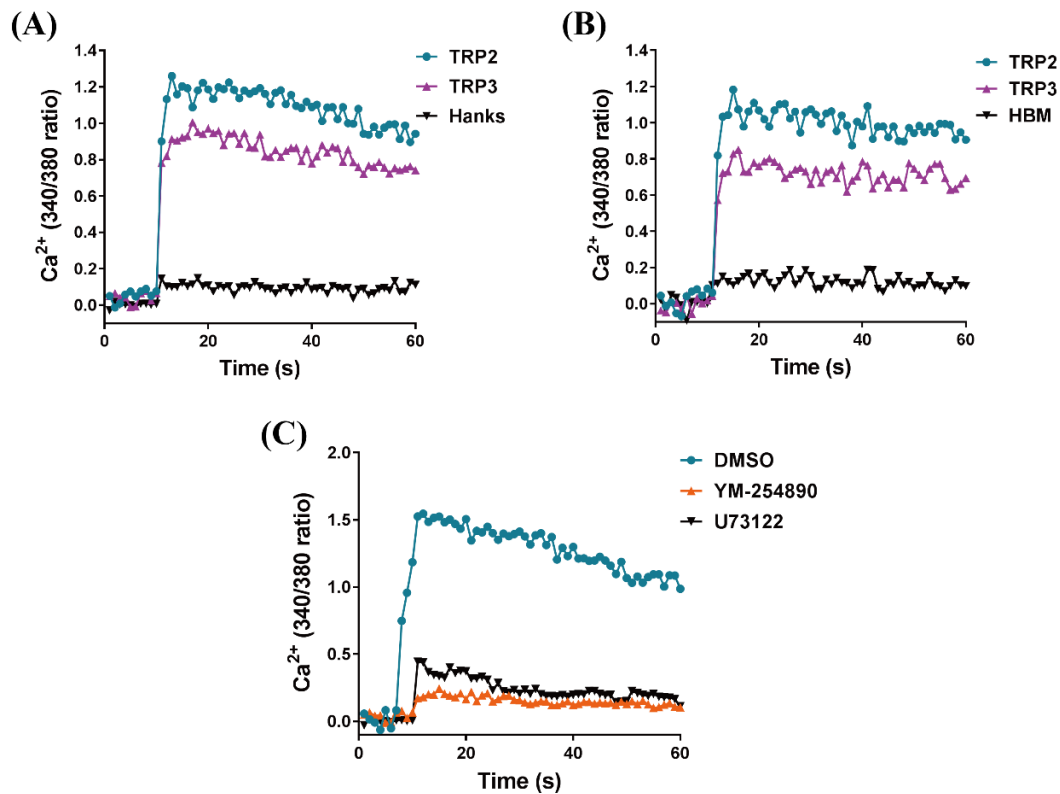

250  
251 **Fig. 6: TRP/TRPR-mediated intracellular  $Ca^{2+}$  influx via  $G_{\alpha q}$ /PLC pathways.** HEK293 cells (A)  
252 and Sf21 cells (B) expressing TRPR were measured in response to TRP2 and TRP3 using the  
253 fluorescent  $Ca^{2+}$  indicator Fura-2 AM. Hanks solution (Hanks) and Hepes-buffered medium (HBM)  
254 were used as a control, respectively. (C), Effects of  $G_{\alpha q}$  inhibitor YM-254890 and PLC inhibitor  
255 U73122 compared to vehicle control DMSO on TRP2-mediated intracellular  $Ca^{2+}$  influx. HEK293  
256 cells expressing TRPR were pretreated with YM-254890 (1  $\mu$ M) or U73122 (10  $\mu$ M) for 2 hours then  
257 stimulated with TRP2 (1  $\mu$ M). Each figure is representative of three independent replicates of each  
258 experiment.

259 Western blot analyses proved that phosphorylation of ERK was induced by TRP/TRPR  
260 signaling. Treatment with different concentrations of TRP2 induced a dose-dependent  
261 phosphorylation of ERK in both HEK293 ( $EC_{50}$ =68.04 nM) and Sf21 ( $EC_{50}$ =1.68 nM) cells  
262 (Fig. 7A and 7B). Further time-dependent analysis indicated that TRP2 elicited transient  
263 phosphorylation of ERK with maximal phosphorylation at 2 min and near basal levels by 90  
264 min (Fig. 7C). Moreover, specific inhibitors were used to elucidate TRP/TRPR  
265 signaling-mediated ERK activation in both HEK293 and Sf21 cells. Treatment with MEK

266 inhibitor U0126, PKA inhibitor H89, and PKC inhibitor Go6983, respectively, led to a  
 267 significant inhibition of TRP/TRPR-mediated ERK activation, whereas  $G_{\alpha i}$  inhibitor PTX had  
 268 no effect, demonstrating that honeybee TRP/TRPR signaling dually coupled to  $G_{\alpha s}$  and  $G_{\alpha q}$   
 269 proteins to activate the ERK signaling pathway (Fig. 7D).

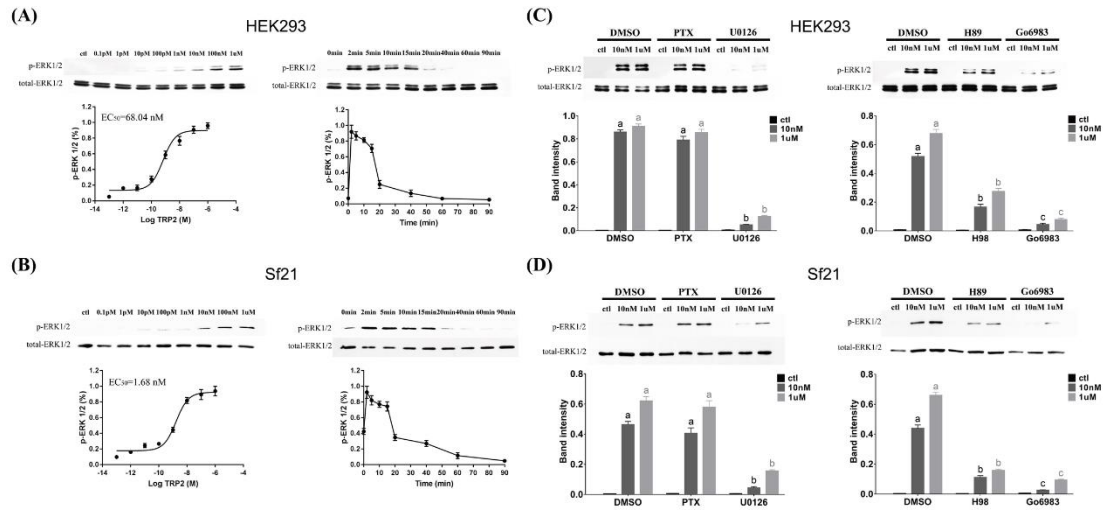

270  
 271 **Fig. 7:  $G_{\alpha q}$ /PKC and  $G_{\alpha s}$ /PKA pathways involved in TRP/TRPR-induced ERK1/2**  
 272 **phosphorylation.** Dose- and time-response analyses of TRP/TRPR-induced ERK1/2 phosphorylation  
 273 in HEK293 cells (A) and Sf21 cells (B). Cells expressing TRPR were serum-starved then incubated  
 274 either with an increasing dose of TRP2, (from 0.1 pM to 1  $\mu$ M) for 10 min or with 100 nM TRP2 for  
 275 different times (from 0 to 90 min), then harvested to quantify ERK1/2 phosphorylation. Effects of  $G_{\alpha i}$   
 276 inhibitor pertussis toxin (PTX), MEK inhibitor U0126, PKA inhibitor H89, and PKC inhibitor Go6983  
 277 on TRP2-induced ERK1/2 phosphorylation in HEK293 cells (C) and Sf21 cells (D). The cells were  
 278 pretreated with or without inhibitors for 2 hours then stimulated with ddH<sub>2</sub>O (control) or TRP2 (10 nM  
 279 or 1  $\mu$ M) for 10 min. The phosphorylated ERK was normalized to a loading control (total ERK). All  
 280 data are presented as mean  $\pm$  s.e.m. from three independent replicates, and blots shown are  
 281 representative of these experiments. One-way ANOVAs followed by Tukey's post-hoc tests were used  
 282 for multi-group comparisons, and significant differences ( $p < 0.05$ ) are denoted by letters.

## 283 2.4 TRP/TRPR signaling acts as negative regulator of task-specific responsiveness

### 284 2.4.1 TRP2 injection decreases task-specific responsiveness

285 Task-specific responsiveness of the different behavioral phenotypes (PFs, NFs, and NBs) was  
 286 decreased by injection of TPR2 in a task-specific manner (Fig. 8, Table S8).

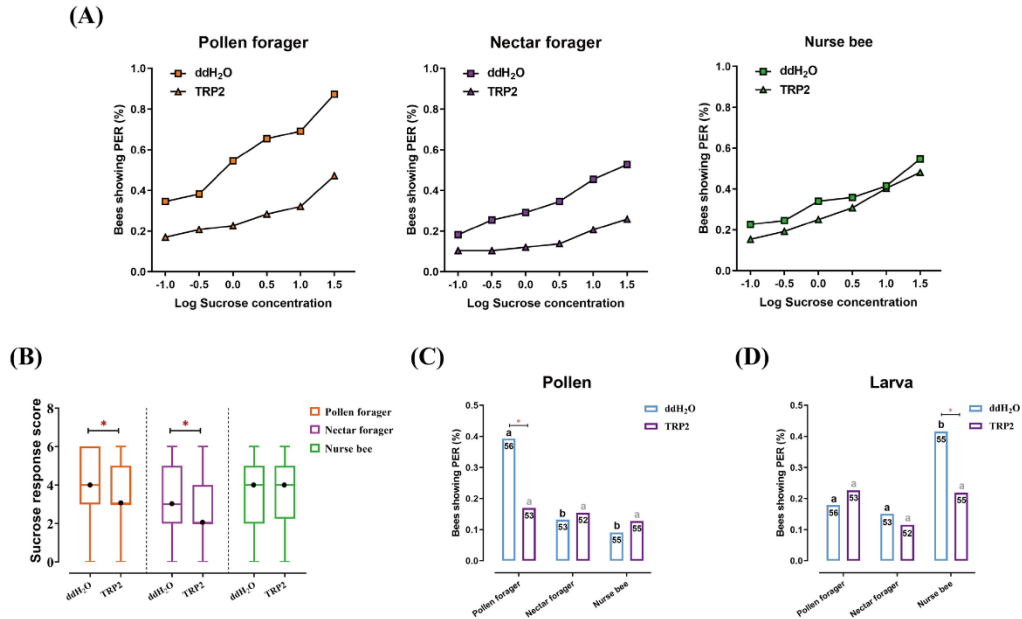

287

288 **Fig. 8: Injection of TRP2 decreases task-specific responsiveness of worker bees.** (A) The  
 289 proportion of pollen foragers (PFs), nectar foragers (NFs), and nurse bees (NBs) exhibiting a positive  
 290 proboscis extension reflex (PER) increases with increasing concentrations of sucrose solutions but is  
 291 overall decreased in PFs and NFs after injection of TRP2 compared to ddH<sub>2</sub>O injection. (B) Median  
 292 sucrose response scores (SRS; intermediate lines) and quartiles (upper and lower lines) of ddH<sub>2</sub>O  
 293 injected and TRP2 injected groups of PFs, NFs, and NBs. Mann-Whitney U tests were used to compare  
 294 the SRS (\*:  $p < 0.05$ ). The proportion of PFs, NFs, and NBs showing PER to pollen stimulation (C)  
 295 and larva stimulation (D) after injection of TRP2 or ddH<sub>2</sub>O. Numbers in bars are the number of  
 296 individuals sampled in each group. Independent Chi-square tests were used to compare the  
 297 responsiveness between different treatments (\*:  $p < 0.05$ ) and between different behavioral phenotypes  
 298 within treatments (significant differences are denoted by letters,  $p < 0.05$ ).

299 Injection of the TRP2 peptide significantly reduced the SRS of PFs ( $Z = 2.2$ ,  $p = 0.031$ ),  
 300 significantly reducing PER responses to all sucrose concentrations used. Similarly, NFs  
 301 injected with TRP2 displayed significantly lower SRS than control-injected NFs ( $Z = 2.3$ ,  $p =$   
 302  $0.019$ ), significantly reducing PER responses to all sucrose concentrations except 0.1% (Fig.  
 303 8A and 8B). In contrast, TRP2-injected NBs did not show significant responsiveness changes  
 304 to sucrose relative to controls. For pollen stimulation, PFs showed significantly decreased  
 305 responsiveness to pollen loads after TRP2 injection ( $\chi^2 = 6.7$ ,  $p = 0.017$ ), while no significant



306 effects were observed in PFs and NFs (Fig. 8C). In the larval responsiveness assay, injection  
307 of TRP2 only significantly affected the responsiveness of NBs ( $\chi^2 = 6.1$ ,  $p = 0.001$ ) but not  
308 NFs or PFs (Fig. 8D).

#### 309 2.4.2 Downregulation of *TRP* or *TRPR* increased task-specific responsiveness

310 The function of TPR/TRPR signaling on task-specific responsiveness was further confirmed  
311 by RNAi-mediated downregulation of *TRP* or *TRPR* that complemented the results of the  
312 TRP2 injection.

313 Knockdown efficiencies were close to 60% for *TRP* and *TRPR* mRNA levels at 24 hours  
314 post-injection of the corresponding dsRNA (Fig. S1). Therefore, subsequent PER assays were  
315 performed 24 hours after dsRNA injection. Relative to control injections, knockdown of  
316 either *TRP* or *TRPR* significantly increased the SRS of NFs (ds*TRP*:  $Z = 2.4$ ,  $p = 0.049$ ;  
317 ds*TRPR*:  $Z = 2.6$ ,  $p = 0.025$ ), specifically increasing the responses of NFs to sucrose at  
318 concentrations of 0.1% (ds*TRP*:  $\chi^2 = 3.9$ ,  $p = 0.039$ ; ds*TRPR*:  $\chi^2 = 4.9$ ,  $p = 0.023$ ), 0.3%  
319 (ds*TRP*:  $\chi^2 = 5.3$ ,  $p = 0.018$ ; ds*TRPR*:  $\chi^2 = 4.3$ ,  $p = 0.030$ ), 1.0% (ds*TRP*:  $\chi^2 = 7.0$ ,  $p = 0.007$ ;  
320 ds*TRPR*:  $\chi^2 = 6.6$ ,  $p = 0.009$ ), and 3.0% (ds*TRP*:  $\chi^2 = 6.0$ ,  $p = 0.012$ ; ds*TRPR*:  $\chi^2 = 7.4$ ,  $p =$   
321 0.006) (Fig. 9A and 9B, Table S9 and S10). Knockdown of *TRP* and *TRPR* didn't  
322 significantly change the overall SRS of PFs and NBs, although it significantly increased the  
323 responses of PFs to sucrose at concentrations of 0.1% (ds*TRP*:  $\chi^2 = 4.4$ ,  $p = 0.029$ ; ds*TRPR*:  $\chi^2$   
324 = 6.1,  $p = 0.011$ ), 0.3% (ds*TRP*:  $\chi^2 = 5.2$ ,  $p = 0.018$ ; ds*TRPR*:  $\chi^2 = 6.0$ ,  $p = 0.011$ ), and 1.0%  
325 (ds*TRP*:  $\chi^2 = 5.0$ ,  $p = 0.020$ ; ds*TRPR*:  $\chi^2 = 4.7$ ,  $p = 0.025$ ). Responses to pollen stimulation  
326 after dsRNA injection indicated that knockdown of either *TRP* or *TRPR* specifically increased  
327 the pollen responsiveness of PFs (ds*TRP*:  $\chi^2 = 6.5$ ,  $p = 0.018$ ; ds*TRPR*:  $\chi^2 = 6.4$ ,  $p = 0.010$ ),

328 whereas the effects on NFs and NBs were not significant (Fig. 9C). The responsiveness of  
 329 NBs to larvae was significantly increased after gene knockdown of either *TRP* ( $\chi^2 = 4.4$ ,  $p =$   
 330  $0.029$ ) or *TRPR* ( $\chi^2 = 4.8$ ,  $p = 0.023$ ) but NFs and PFs were not affected (Fig. 9D).

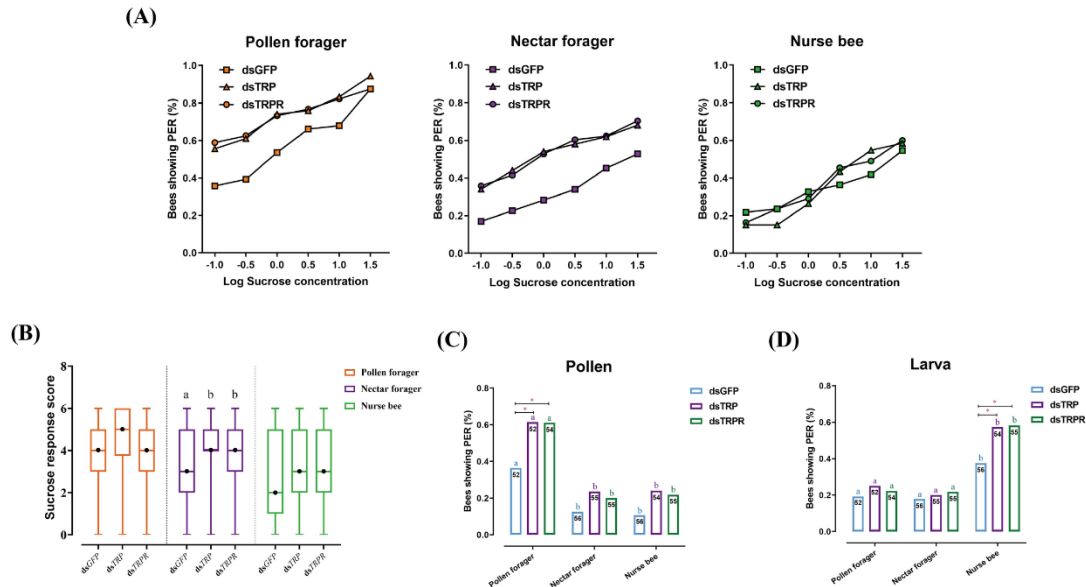

331  
 332 **Fig. 9: RNAi-mediated knockdown of *TRP* and *TRPR* expression alter task-specific responses of**  
 333 **worker bees.** (A) Proportion of positive proboscis extension reflex (PER) responses of pollen foragers  
 334 (PFs), nectar foragers (NFs), and nurse bees (NBs) increases with increasing concentrations of sucrose  
 335 solutions but overall increases occur only in PFs and NFs after knockdown of *TRP* or *TRPR* transcripts  
 336 compared to GFP control. Statistical details of these sucrose responsiveness comparisons are shown in  
 337 Table S10. (B) Median sucrose response scores (SRS; intermediate lines) and quartiles (upper and  
 338 lower lines) of ddH<sub>2</sub>O injected and TRP2 injected PFs, NFs, and NBs. Kruskal-Wallis tests with  
 339 Bonferroni correction were used to compare the SRSs of the three treatment groups of each behavioral  
 340 phenotype and significant differences are denoted by letters ( $p < 0.05$ ). The proportion of PFs, NFs,  
 341 and NBs showing PER to pollen stimulation (C) and larvae stimulation (D) after *GFP*, *TRP*, or *TRPR*  
 342 knockdown. Numbers in bars are the number of individuals sampled in each group. Independent  
 343 Chi-square tests were used to compare the task-specific responsiveness between different treatments (\*:  
 344  $p < 0.05$ , \*\*:  $p < 0.01$ ) within behavioral phenotypes and between different behavioral phenotypes  
 345 within each treatment (significant differences are denoted by letters,  $p < 0.05$ ).

### 346 2.5 TRP/TRPR signaling regulates ERK signaling *in-vivo*

347 To complement our finding that TRP/TRPR signaling activates ERK phosphorylation in cell  
 348 culture, we used our *in-vivo* manipulations of TRP-signaling to confirm the link between

349 TRP- and ERK signaling in living honeybee workers. Western blot results confirmed that  
350 TRP/TRPR signaling triggers ERK signaling *in vivo*. The level of phosphorylated ERK  
351 significantly increased after injection of TRP2 peptide into NBs, PFs, and NFs (Fig. 10A) and  
352 decreased after knockdown of the *TRP* or *TRPR* transcripts (Fig. 10B).

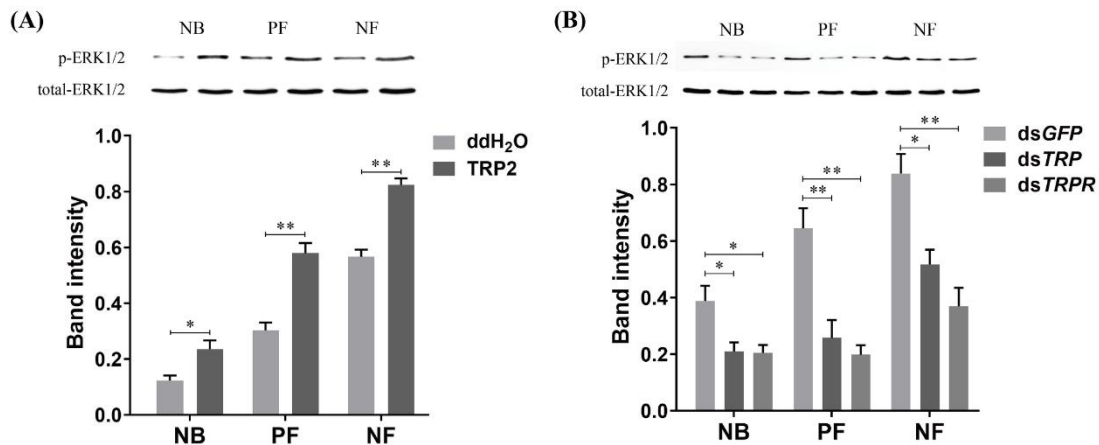

353

354 **Fig. 10: Manipulations of TRP and TRPR levels change ERK phosphorylation states in the**  
355 **worker bee brains.** (A) The ERK phosphorylation (p-ERK) levels after injection of TRP2 or ddH<sub>2</sub>O  
356 into pollen foragers (PFs), nectar foragers (NFs), and nurse bees (NBs) of *Apis mellifera ligustica*. (B)  
357 The p-ERK levels after transcript knockdown of *GFP*, *TRP*, or *TRPR* in PFs, NFs, and NBs. The  
358 p-ERK was normalized to a loading control (total-ERK). The data shown are representative of three  
359 independent experiments, and blots shown are representative of these experiments. Student's t-tests  
360 were used for pairwise comparisons between control and treatment groups within each behavioral  
361 phenotype (\*:  $p < 0.05$ , \*\*:  $p < 0.01$ , \*\*\*:  $p < 0.001$ ).

### 362 3. Discussion

363 Behavioral plasticity plays a central role in animal adaptation and modulating behavioral  
364 responsiveness to different stimuli and contexts is key to individual fitness. The success of  
365 social insects is partly due to their efficient division of labor, a form of behavioral plasticity  
366 among instead of within individuals. In this study, we demonstrated that the responsiveness to  
367 task-relevant stimuli correlates with behavioral specialization in two different honeybee  
368 species. Through parallel characterization of the neuropeptidome, we identified two

369 tachykinin-related peptides (TRP2 and TRP3) as putative mechanism to adjust task-specific  
370 response thresholds and thus proximally guide division of labor. Subsequently, we  
371 characterized the molecular action of TRP2 and TRP3 in cell culture by verifying their  
372 binding to their membrane-bound receptor and demonstrating activation of multiple  
373 down-stream signaling mechanisms. Finally, we verified causal involvement of TRP  
374 signaling in modulating task-specific behavioral response thresholds through complementary  
375 outcomes of TRP2 injection and RNAi-mediated knockdown of *TRP* and its receptor *TRPR*:  
376 while injection decreased task-specific responses, down-regulation of TRP or TRPR increased  
377 the same specific responses. Thus, we present the first process that tunes the behavioral  
378 responsiveness of animals to specific stimuli compared to others. We use behaviorally  
379 specialized honeybee workers as models but hypothesize that this function of TRP signaling  
380 could be more widely conserved to adjust the context-specificity of behavioral responses in  
381 animals.

382       Among all the signaling molecules in the nervous system, neuropeptides represent the  
383 largest and most diverse category and are crucial in orchestrating various biological processes  
384 and behavioral actions [50, 51]. Thus, we quantitatively compared the entire neuropeptidome  
385 among three behavioral worker phenotypes of *Apis mellifera ligustica* (AML) and *Apis*  
386 *cerana cerana* (ACC) without an *a-priori* assumption. In addition to characterizing the ACC  
387 neuropeptidome for the first time and discovering several new neuropeptides from the AML  
388 brain, we identified TRP2 and TRP3 as candidates. TRPs have been associated with the  
389 modulation of appetitive olfactory sensation [52-54], sex pheromone perception [41], and  
390 aggression [55]. Particularly in honeybees, *TRP* is preferentially expressed in the mushroom

391 body and some neurons scattered in the antennal and optic lobes [56]. This expression is  
392 consistent with our hypothesis that TRP-signaling may be a general modulator of behavioral  
393 responsiveness. TRPs expression in the honeybee worker brain increases during the transition  
394 from nursing to foraging, further implicating it in the regulation honeybee social behavior [49,  
395 57].

396 In our study, only expression of TRP2 and TRP3 varied consistently among behavioral  
397 phenotypes of AML and ACC. In both species, TRP2 and TRP3 were most abundant in the  
398 brain of NFs, followed by PFs, and finally NBs. This is consistent with the very specific  
399 responsiveness of NBs to brood stimuli observed in our PER experiments, while the  
400 responsiveness of PFs and NFs was successively less specific: PFs responded specifically to  
401 two stimuli, while NFs did not show specifically strong responses to any stimuli. Moreover,  
402 the comparison between AML and ACC indicated higher TRP2 and TRP3 abundance in ACC  
403 in each behavioral phenotype, commensurate with the less specific PER responsiveness in  
404 ACC compared to AML. A few other neuropeptides, such as apidaecins, diuretic hormone,  
405 and prohormone-3, showed somewhat similar expression patterns in both species, but none of  
406 these was as tightly correlated to behavioral responsiveness and none has previously been  
407 connected with behavioral regulation in insects or other animals. Therefore, the TRPs were  
408 chosen as candidates of the control of honeybee division of labor for subsequent functional  
409 tests and molecular characterization.

410 The action of most insect neuropeptides is mediated by binding to G-protein-coupled  
411 receptors (GPCRs) and often involves cAMP and Ca<sup>2+</sup> as second messengers [58]. The TRPR  
412 is activated by TRPs triggering intracellular cAMP accumulation and Ca<sup>2+</sup> mobilization in

413 fruit flies and silkworms (*Bombyx mori*) [59, 60], while no cAMP-responses were discovered  
414 in stable flies (*Stomoxys calcitrans*) [61]. The results of our peptide-based binding assays  
415 functionally confirmed that the honeybee TRPR is indeed the receptor for TRP2 and TRP3.  
416 The subsequent functional assays revealed that TRP signaling results in a dose-dependent  
417 increase in both intracellular cAMP and  $\text{Ca}^{2+}$ . Together, these results indicate that TRPs can  
418 activate TRPR and trigger second messengers to regulate downstream functions. TRP2  
419 displayed a higher affinity to TRPR and induced higher cAMP and  $\text{Ca}^{2+}$  signaling than TRP3,  
420 leading us to focus on TRP2 in the later *in vivo* experiments. Moreover, TRP signaling is  
421 sensitive to  $G_{\text{as}}$  activation and is significantly blocked by  $G_{\text{aq}}$  and PKA inhibitors, suggesting  
422 both  $G_{\text{as}}$  and  $G_{\text{aq}}$  are involved in TRP signaling in honeybees. Many GPCRs are able to  
423 induce mitogen-activated protein kinase (MAPK) cascades via cooperation of  $G_{\text{as}}$ ,  $G_{\text{aq}}$ , and  
424  $G_{\text{ai}}$  signals, leading to the phosphorylation of ERK1/2, which plays critical roles in diverse  
425 biological processes [62]. Our results indicate that honeybee TRP signaling mediates  
426 phosphorylation of ERK1/2 in a dose- and time-dependent manner in both HEK293 and Sf21  
427 cells. In addition, ERK1/2 activation was significantly inhibited by the PKA, PKC, and MEK  
428 inhibitors, which is in line with the observation of intracellular cAMP accumulation and  $\text{Ca}^{2+}$   
429 mobilization. Thus, honeybees seem to be very similar to silkworms with regards to the  
430 involvement of the  $G_{\text{as}}$ /cAMP/PKA and  $G_{\text{aq}}$ / $\text{Ca}^{2+}$ /PKC signaling pathways in the regulation of  
431 TRP-induced ERK1/2 activation [60]. Taken together, our results demonstrate that the  
432 honeybee TRPR is specifically activated by TRPs, eliciting intracellular cAMP accumulation,  
433  $\text{Ca}^{2+}$  mobilization, and ERK phosphorylation by dually coupling  $G_{\text{as}}$  and  $G_{\text{aq}}$  signaling  
434 pathways.

435 Our *in vitro* and *in vivo* demonstrations that TRP signaling activates the ERK putatively  
436 link TRP signaling also to the insulin/insulin-like signaling (IIS) pathway. IIS is controlled by  
437 neuropeptides through ERK in *Drosophila* [63], and this connection in honeybees ties TRP  
438 back to the age-based division of labor among workers: IIS signaling influences the timing of  
439 the behavioral maturation of honeybee workers and brain *AmIlp1* is significantly higher  
440 expressed in foragers than nurses [64], consistent with our finding that TRPs are higher in  
441 foragers than nurses. Numerous other physiological changes accompany the transition from  
442 in-hive nurse bees to foragers [37, 65-67] and our results integrate TRPs as the most  
443 important neuropeptides into the regulation of the behavioral ontogeny of honeybee workers  
444 and potential feedback loops to the modulation of behavioral response thresholds. The  
445 specialization of nectar and pollen foragers has also been linked to IIS signaling [68, 69] and  
446 explained by differences in sucrose response thresholds [70]. Our findings here may connect  
447 the differences in response thresholds and IIS mechanistically through the TRP and ERK  
448 signaling pathways.

449 The PER paradigm is well-suited to test behavioral response thresholds and has been  
450 used for over 50 years in honeybees [36]. Consistent with previous studies, we found pollen  
451 foragers to be more responsive to sucrose than nectar foragers and nurses in *Apis mellifera*  
452 [32]. Moreover, we found corresponding differences between these behavioral groups in the  
453 closely related *Apis cerana*. The pollen forager's responsiveness to low sucrose  
454 concentrations might also make them more responsive to pollen, but the causation of the PER  
455 to pollen is unclear [71] and other components of pollen may functionally distinguish pollen  
456 from sucrose responsiveness [34]. Our results support the view that pollen and sucrose are

457 distinct stimuli: While our experimental manipulations of TRP signaling altered the  
458 responsiveness of pollen foragers to pollen and sucrose, only responsiveness to sucrose was  
459 affected in nectar foragers and only responsiveness to larvae was affected in nurses. The  
460 functional significance of the PER in response to larvae is currently unclear, but we show that  
461 it is specific to nurses and it has previously been linked to brood provisioning [35]. Thus, our  
462 diverse PER results in two species comprehensively support the hypothesis that task-specific  
463 response thresholds guide behavioral specialization, leading to division of labor among  
464 honeybee workers [21-23].

465 TRPs may adjust specific sensory neural circuits, potentially acting in concert with other  
466 neuromodulators [72, 73]. However, we have currently no evidence to support the hypothesis  
467 of different molecular TRP actions in different stimulus-response pathways and our consistent  
468 results from two very different cell cultures indicate that TRP signaling may be relatively  
469 robust to the cellular environment. Thus, we favor the more parsimonious explanation is that  
470 TRP signaling acts generally through the identified mechanisms to decreases task-specific  
471 response thresholds of behavioral specialists: It decreases pollen and sucrose responsiveness  
472 in pollen foragers, sucrose responsiveness in nectar foragers, and responsiveness to larvae in  
473 nurses. TRP signaling may thus be a general regulator of how task-specific stimuli are  
474 weighted relative to others and consequently how specialized behavioral specialists are. This  
475 effect translates to different degrees of division of labor in social insect colonies and may  
476 control the context-specificity of behavioral responses in animals more generally [74].

477 Although AML and ACC are close relatives with similar basic biology, some behavioral  
478 differences have evolved since their speciation [75]. AML and ACC share the age-based



479 division of labor, with younger bees specializing on nursing before maturing to foraging  
480 activities [76] and ACC foragers also specialize in nectar or pollen collection [77] similar to  
481 AML [28]. Accordingly, we found the main differences of stimulus responsiveness and TRPs  
482 expression among worker phenotypes conserved. However, ACC exhibited less responses to  
483 the task-specific stimuli than AML. Consistent PER differences in AML and ACC between  
484 nectar and pollen foragers and a generally lower responsiveness of ACC have been identified  
485 before [78], but the biological interpretation has remained unclear. It is possible that the  
486 species differences arise due to methodological bias, favoring AML performance in PER  
487 assays. However, our study offers the alternative explanation that ACC workers are less  
488 specialized than AML workers due to higher TRP signaling. Lower innate specialization may  
489 accompany better learning of ACC [79], facilitating its more opportunistic worker task  
490 allocation and resource exploitation than AML [80]. These alternative life history strategies  
491 are plausible, given the typical differences in colony size and habitat [73, 74, 81]. All three  
492 worker phenotypes of ACC exhibited higher levels of TRPs than their AML counterparts but  
493 functional verification at the level of colony phenotypes will be required to unambiguously  
494 link TRP signaling to such interspecific differences in life history.

## 495 **4. Materials and Methods**

### 496 **4.1. Honeybee sources and sampling**

497 Two honeybee species, *Apis mellifera ligustica* (AML) and *Apis cerana cerana* (ACC), were  
498 maintained in the apiary of the Institute of Apicultural Research at the Chinese Academy of  
499 Agricultural Sciences in Beijing. Three colonies of each species with mated queens of  
500 identical age were selected as experimental colonies, and before experiments the colonies

501 were equalized in terms of adult bee population, brood combs, and food storage. Frames  
502 containing old pupae (1-2 days before emergence) were put into an incubator (34°C and 80%  
503 relative humidity) for eclosion. Newly emerged worker bees were paint marked on their  
504 thoraxes and placed back into their parent colonies. Ten days later, marked bees that had their  
505 head and thorax in open brood cells while contracting their abdomen for more than 10  
506 seconds were collected as nurse bees (NBs). Twenty day-old, marked bees were collected  
507 during early morning (between 8:00 am and 10:00 am) in good weather conditions during the  
508 blooming period of black locusts (*Robinia pseudoacacia* L.) as forager bees. The entrance to  
509 the hives were blocked to facilitate collecting. Bees flying into the hive with pollen loads  
510 were collected as pollen foragers (PFs), returning foragers without pollen loads were collected  
511 as nectar foragers (NFs). The experimental design of six groups (three behavioral phenotypes  
512 in two species) was used to compare responsiveness to task-specific stimuli (section 4.2) and  
513 to relate these phenotypes to differences in the brain neuropeptidome (section 4.3).

#### 514 **4.2. Comparative Proboscis Extension Reflex (PER) experiments**

515 To investigate the responsiveness of different worker bee behavioral phenotypes (NBs, PFs,  
516 and NFs of AML and ACC) to different stimulus modalities (sucrose solution, pollen, and  
517 larva), series of PER experiments were performed. One hundred bees of each behavioral  
518 phenotype were collected from each experimental colony in the morning, transferred to the  
519 laboratory and narcotized on ice, then harnessed using a previously described protocol [82].  
520 All harnessed bees were fed to satiation with 50% sucrose solution and placed in a dark  
521 incubator (20°C and 65% relative humidity) overnight. After 24 hours, all surviving bees  
522 were assayed for their PER following the methodology of Page et al. [32]. Each stimulus was

523 assessed independently with a new set of bees.

524 To investigate the sucrose responsiveness, bees were assayed using an ascending order of  
525 sucrose concentrations: 0.1, 0.3, 1, 3, 10, and 30% (weight/weight). A small droplet of each  
526 solution was touched to the bees' antennae for 3 seconds and the extension of the proboscis  
527 was monitored during this time. The interval between each sucrose solution trial was 5 min to  
528 exclude sensitization or habituation effects. The total number of PER responses after  
529 stimulation with the six different sucrose concentrations were combined into a sucrose  
530 response score (SRS) of a bee [83-85]. The SRSs of the three behavioral phenotypes in the  
531 same species were compared using Kruskal-Wallis tests with Bonferroni correction. Pairwise  
532 Mann-Whitney U tests were used for comparing the same phenotype from two honeybee  
533 species. The sucrose responsiveness for specific sucrose concentrations was further compared  
534 between different groups with independent Chi-square tests.

535 To test pollen stimulation, fresh pollen loads that had been removed from the leg of  
536 randomly selected pollen foragers of the test group were used: AML were tested with pollen  
537 collected by AML foragers and ACC with pollen collected by ACC foragers. These loads  
538 contained a mixture of different pollen, predominated by black locust (*Robinia pseudoacacia*).  
539 As a control for mechanical stimulation, each bee had both antennae first touched with a piece  
540 of filter paper, and spontaneous responders were excluded. Subsequently both antennae of  
541 each bee were gently touched with a pollen load and PER responses were recorded. The  
542 pollen responsiveness was compared with independent Chi-square tests between different  
543 groups.

544 To test responsiveness to larva, one-day-old larvae from each honeybee species were

545 collected, briefly rinsed in distilled water to remove royal jelly residue and dried on a filter  
546 paper. As before, both antennae of bees were touched with a piece of filter paper first, and  
547 spontaneous responders were excluded, then PERs in response to a larva touching the  
548 antennae were recorded. The responsiveness to larvae was compared with independent  
549 Chi-square tests between different groups. Statistical analyses were conducted using SPSS  
550 20.0 (IBM, USA).

### 551 **4.3. Quantitative comparisons of brain neuropeptides**

552 To explore brain neuropeptide functions in behavioral regulation, a label-free quantitative  
553 strategy was employed to compare neuropeptidomic variations between behavioral  
554 phenotypes and the two honeybee species. Three independent biological replicate samples  
555 (120 bees/sample) of NBs, PFs, and NFs of both AML and ACC (18 samples total) were  
556 collected and immediately frozen in liquid nitrogen. Individual brains were carefully  
557 dissected from the head capsule while remaining chilled on ice, and the dissected brains were  
558 frozen at -80°C until neuropeptide extraction.

559 The brains were homogenized at 4°C by using a 90:9:1 solution of methanol, H<sub>2</sub>O, and  
560 acetic acid. The homogenates were centrifuged at 12000g for 10 min at 4°C. The resulting  
561 supernatant containing the neuropeptides was collected and dried. The extracted neuropeptide  
562 samples were dissolved in 0.1% formic acid in distilled water, and the peptide concentration  
563 was quantified using a Nanodrop 2000 spectrophotometer (Thermo Fisher Scientific, USA).  
564 LC-MS/MS analysis was performed on an Easy-nLC 1200 (Thermo Fisher Scientific)  
565 coupled Q-Exactive HF mass spectrometer (Thermo Fisher Scientific). Buffer A (0.1% formic  
566 acid in water) and buffer B (0.1% formic acid in acetonitrile) were used as mobile phase

567 buffers. Neuropeptides were separated using the following gradients: from 3 to 8% buffer B  
568 in 5 min, from 8 to 20 % buffer B in 80 min, from 20 to 30% buffer B in 20 min, from 30 to  
569 90% buffer B in 5 min, and remaining at 90% buffer B for 10 min. The eluted neuropeptides  
570 were injected into the mass spectrometer via a nano-ESI source (Thermo Fisher Scientific).  
571 Ion signals were collected in a data-dependent mode and run with the following settings: full  
572 scan resolution at 70,000, automatic gain control (AGC) target:  $3 \times 10^6$ , maximum inject time  
573 (MIT): 20 ms, scan range: m/z 300-1,800; MS/MS scans resolution at 17,500, AGC target: 1  
574  $\times 10^5$ , MIT: 60 ms, isolation window: 2 m/z, normalized collision energy: 27, loop count 10,  
575 and dynamic exclusion: charge exclusion: unassigned, 1, 8, >8; peptide match: preferred;  
576 exclude isotopes: on; dynamic exclusion: 30 s. Raw data were retrieved using Xcalibur 3.0  
577 software (Thermo Fisher Scientific).

578 The extracted MS/MS spectra were searched against a composite database of *Apis*  
579 *mellifera* (23,491 protein sequences, downloaded from NCBI on July, 2018) or *Apis cerana*  
580 (20,934 protein sequences, downloaded from NCBI on July, 2018) using in-house PEAKS 8.5  
581 software (Bioinformatics Solutions, Canada). Amidation (A, -0.98) and pyro-glu from Q (P,  
582 -17.03) were selected as variable modifications. The other parameters used were: parent ion  
583 mass tolerance, 20.0 ppm; fragment ion mass tolerance, 0.05 Da; enzyme, trypsin; allowing a  
584 nonspecific cleavage at both ends of the peptide; maximum missed cleavages per peptide, 2;  
585 maximum allowed variable PTM per peptide, 2. A fusion target-decoy approach was used for  
586 the estimation of the false discovery rate (FDR) and controlled at  $\leq 1.0\%$  ( $-10 \log P \geq 20.0$ )  
587 both at protein and peptide levels. Neuropeptide identifications were only used if  $\geq 2$  spectra  
588 were identified in at least two of the three replicates of each sample type.

589 Quantitative comparison of brain neuropeptides was performed by the label-free approach  
590 in PEAKS Q module. Feature detection was performed separately on each sample by using  
591 the expectation-maximization algorithm. The features of the same peptide from different  
592 samples were reliably aligned together using a high-performance retention time alignment  
593 algorithm [86]. Peptide features were considered significantly different between experimental  
594 groups if pairwise  $p < 0.01$  and fold change  $\geq 1.5$ . A heat map of differentially expressed  
595 proteins was created by Gene cluster 3.0 using the unsupervised hierarchical clustering, and  
596 the result was visualized using Java Tree view software. The LC-MS/MS data and search  
597 results are deposited in ProteomeXchange Consortium  
598 (<http://proteomecentral.proteomexchange.org>) via the PRIDE partner repository with the  
599 dataset identifier PXD018713.

#### 600 **4.4. Characterization of honeybee tachykinin related peptide (TRP) signaling pathway**

601 To characterize honeybee TRP signaling pathway, the TRP receptor (TRPR) gene was first  
602 cloned and expressed in human and insect cell lines to identify its cellular location and verify  
603 its binding to TRPs. Additionally, these cells were used to test whether TRP/TRPR signaling  
604 triggers intracellular cAMP accumulation,  $Ca^{2+}$  mobilization, and ERK phosphorylation.

##### 605 2.4.1. TRPR gene clone and expression

606 To amplify the full-length sequence encoding *TRPR* of *Apis mellifera*, primers were designed  
607 using Primer Premier 5.0 software (PREMIER Biosoft, USA) based on the sequence from  
608 GenBank<sup>TM</sup> KT232312. The coding sequence of TRPR was amplified and cloned into  
609 FLAG-tag expression vectors (pCMV-FLAG and pBmIE1-FLAG) and EGFP-tag expression  
610 vectors (pEGFP-N1 and pBmIE1-EGFP). The primers used are documented in Table S11. All

611 constructs were sequenced to verify the correct sequence, orientation, and reading frame of  
612 the inserts.

613 The human embryonic kidney cell line HEK293 and the insect *Spodoptera frugiperda*  
614 pupal ovary cell line Sf21 were used for honeybee TRPR expression. HEK293 cells were  
615 cultured in DMEM medium (Gibco, USA) supplemented with 10% fetal bovine serum (FBS).  
616 Sf21 cells were cultured in TC100 medium (Gibco) supplemented with heat-inactivated 10%  
617 FBS. Transfection of HEK293 cells was performed using Lipo6000™ transfection reagent  
618 (Beyotime, China), while transfection of Sf21 cells was performed using LipoInsect™  
619 transfection reagent (Beyotime), according to the manufacturer's instructions.

#### 620 2.4.2. Cellular location of TRPR

621 To confirm the location of the honeybee TRPR, receptor surface expression assays were  
622 performed. HEK293 or Sf21 cells expressing TRPR-EGFP were seeded onto poly-L-lysine  
623 coated glass coverslips and allowed to attach overnight under normal growth conditions. After  
624 24 hours, cells were incubated with the membrane probe DiI (Beyotime) and the nucleic acid  
625 probe Hoechst 33342 (Beyotime) at 37°C for 10 min, then fixed with 4% paraformaldehyde  
626 for 15 min. Cells transfected with empty EGFP-tag expression vectors were used as a control.  
627 The cells were imaged using a Leica SP8 (Leica Microsystems, Germany) confocal  
628 microscope equipped with an HC PL APO CS2 63×/1.40 oil objective. Images were acquired  
629 with the sequence program in the Leica LAS X software.

#### 630 2.4.3. Binding of TRPs to TRPR

631 To confirm the direct binding of the honeybee TRPs to TRPR, competitive binding  
632 experiments were performed using synthesized TAMRA-TRP2 (TAMRA-ALMGFQGVra)

633 and TAMRA-TRP3 (TAMRA-APMGFQGMRA), with TAMRA labeled at the N-terminus.  
634 The neuropeptides used as ligands in here and in later sections were commercially  
635 synthesized by SynPeptide Co, Ltd (China). All peptides were purified by reverse-phase high  
636 performance liquid chromatography with a purity > 98%, lyophilized, and diluted to the  
637 desired concentrations for subsequent experiments. The peptide sequences were verified by us  
638 using a Q-Exactive HF mass spectrometer (Thermo Fisher Scientific).

639 HEK293 and Sf21 cells expressing FLAG-TRPR were first seeded onto  
640 poly-L-lysine-coated 96-well plates and cultured overnight. On the next day, cells were  
641 washed once with phosphate-buffered saline (PBS), then incubated with 25 mL  
642 TAMRA-TRP2 or TAMRA-TRP3 (10 nM) in the presence of increasing concentrations of  
643 unlabeled TRP2 and TRP3 in a final volume of 100 mL of binding buffer (PBS containing 0.2%  
644 bovine serum albumin). Cells were incubated at room temperature for 2 hours. Fluorescence  
645 intensity was measured with a fluorescence spectrometer microplate reader (Tecan Infinite  
646 200 PRO, Tecan, Switzerland) after washing twice with binding buffer. The cells transfected  
647 with empty FLAG-tag expression vectors were used as a control. The binding displacement  
648 curves were analyzed by GraphPad Prism 8.0 (GraphPad Software, USA) using the non-linear  
649 logistic regression method.

#### 650 2.4.4. TRP/TRPR signaling targets: cAMP, Ca<sup>2+</sup>, and ERK

651 To test whether TRP/TRPR signaling affects cAMP accumulation, intracellular cAMP was  
652 measured after incubation of HEK293 and Sf21 cells expressing FLAG-TRPR and pCRE-Luc  
653 with TRP2 and TRP3. After seeding in a 96-well plate overnight, HEK293 or Sf21 cells  
654 co-transfected with pFLAG-TRPR and pCRE-Luc were grown to about 90% confluence.



655 After washing once with PBS, cells were incubated with the neuropeptides TRP2, TRP3,  
656 short neuropeptide F (SNF), pigment-dispersing hormone (PDH), and corazonin (CRZ) in  
657 serum-free medium for 4 hours at 37°C for HEK293 cells, and at 28°C for Sf21 cells. Cells  
658 transfected with empty EGFP-tag expression vectors were used as a control. Luciferase  
659 activity was detected by a luciferase assay system (Promega, USA). Fluorescence intensity  
660 was measured with a Tecan fluorescence spectrometer. When characterizing the  
661 TRP-mediated cAMP accumulation, cells were pretreated with G<sub>oi</sub> inhibitor pertussis toxin  
662 (PTX), G<sub>os</sub> activator cholera toxin (CTX), G<sub>oq</sub> inhibitor YM-254890, and PKA inhibitor  
663 H89 before stimulation with TRP2.

664 To test whether TRP signaling also affects intracellular Ca<sup>2+</sup> concentrations, intracellular  
665 Ca<sup>2+</sup> was measured after incubation of HEK293 and Sf21 cells expressing FLAG-TRPR with  
666 TRP2 or TRP3. Cells were detached by a non-enzymatic cell dissociation solution  
667 (Sigma-Aldrich, USA), washed twice with PBS, and resuspended at a density of 5 × 10<sup>6</sup>  
668 cells/ml in HEPES buffered saline (Macklin, China). Cells were then incubated with 3 μM  
669 Fura-2 AM (MedChemExpress, USA) for 30 min at 37°C for HEK293 cells, and at 28°C for  
670 Sf21 cells. Intracellular Ca<sup>2+</sup> flux was measured using excitation wavelengths alternating at  
671 340 and 380 nm with emission measured at 510 nm in a Tecan fluorescence spectrometer.  
672 When characterizing the detailed TRP-mediated intracellular Ca<sup>2+</sup> mobilization, cells were  
673 pretreated with G<sub>oq</sub> inhibitor YM-254890 and PLC inhibitor U73122 before stimulation with  
674 TRP2.

675 To assess whether TRP signaling mediates ERK1/2 signaling, ERK1/2 phosphorylation  
676 was measured by Western blot analysis after incubation of HEK293 and Sf21 cells expressing

677 FLAG-TRPR with TRP2. Cells were seeded in 24-well plates and starved for 4 hours in  
678 serum-free medium to reduce background ERK1/2 activation and eliminate the effects of the  
679 change of medium. After incubation with TRP2, cells were lysed by RIPA buffer (Beyotime)  
680 at 4°C for 30 min. Protein concentration was determined according to the Bradford method  
681 using BSA as the standard and the absorption was measured at 595 nm (spectrophotometer  
682 DU800, Beckman Coulter, Los Angeles, CA), then all the samples were kept in -80°C for  
683 further use. For Western blot, equal amounts of total cell lysate (20 µg/lane) were fractionated  
684 by SDS-PAGE (10%) and transferred to a PVDF membrane (Millipore, USA) using an iBlot  
685 dry blotting system (Invitrogen, USA). The membranes were blocked for 2 hours at room  
686 temperature and then incubated with rabbit monoclonal anti-pERK1/2 antibody (Cell  
687 Signaling Technology, USA) and anti-rabbit horseradish peroxidase-conjugated secondary  
688 antibody (Cell Signaling Technology) according to the manufacturers' protocols. Antibody  
689 reactive bands were visualized using Pierce<sup>TM</sup> ECL western blotting substrate (Thermo Fisher  
690 Scientific, USA) followed by photographic film exposure. Total ERK1/2 was assessed as a  
691 loading control after p-ERK1/2 chemiluminescence detection. Quantification analyses were  
692 performed using Gel-Pro Analyzer 4.0 software (Media Cybernetics, USA).

693 To explore the detailed TRP-mediated ERK1/2 signaling, cells were pretreated with G<sub>oi</sub>  
694 inhibitor pertussis toxin (PTX), MEK inhibitor U0126, PKA inhibitor H89, and PKC inhibitor  
695 Go6983 before stimulation with TRP2.

#### 696 **4.5. Effects of TRP2 injection on task-specific responsiveness**

697 To confirm the function of TPR on task-specific responsiveness, NBs, PFs, and NFs of AML  
698 were injected with TRP2 and tested for their PER response to sucrose solution, pollen, and

699 larva. About 150 bees of each behavioral phenotype were collected in the morning, then  
700 harnessed, fed and placed in a dark incubator as described in section 4.2. After 24 hours, all  
701 surviving bees were evenly divided into two groups and injected with 1  $\mu$ l TRP2 solution (1  
702  $\mu$ g/ $\mu$ l, synthesized TRP2 dissolved in ddH<sub>2</sub>O) or 1  $\mu$ l of ddH<sub>2</sub>O into the head of honeybees via  
703 the central ocellus using a glass capillary needle coupled to a microinjector. Bees injected  
704 with ddH<sub>2</sub>O were used as control. All injected bees were put back to the dark incubator and 1  
705 hour after injection all surviving bees were assayed for their PER to stimulations of sucrose  
706 solution, pollen, and larva as described in section 4.2. Each experiment was performed with a  
707 new set of bees containing about 55 individuals per experimental and control group.

708 The average sucrose response scores of the TRP2 injection group and the ddH<sub>2</sub>O  
709 injection group were compared separately for each of the three behavioral phenotypes (NBs,  
710 PFs, and NFs) using pairwise Mann-Whitney U tests. The sucrose responsiveness was further  
711 compared between different groups at each specific sucrose concentration with independent  
712 Chi-square tests. The responsiveness to pollen and larvae was compared between TRP2  
713 injection group and ddH<sub>2</sub>O injection group with independent Chi-square tests for each  
714 behavioral phenotype separately. All statistical analyses were performed with SPSS Statistics  
715 20.0 (IBM).

#### 716 **4.6. Effects of RNAi-mediated downregulation of *TRP* or *TRPR* on responsiveness**

717 To further confirm the hypothesized effects of TPR/TRPR signaling on task-specific  
718 responsiveness, RNAi-mediated downregulation of *TRP* and *TRPR* were performed on NBs,  
719 PFs, and NFs of AML and then their PER to sucrose solution, pollen, and larva were  
720 compared to controls.

721 Before evaluating the behavioral effects of transcript knockdown of *TRP* or *TRPR*,  
722 preliminary experiments were performed to test the dsRNA-mediated knockdown efficiencies  
723 of *TRP* and *TRPR*. The dsRNAs of the *TRP* and *TRPR* genes were prepared using the T7  
724 RiboMAX Express RNAi system (Promega). The primers used are listed in Table S11. Sixty  
725 bees were randomly collected from each of the three AML colonies. Bees were harnessed, fed  
726 with sucrose and put into the dark incubator (20°C and 65% relative humidity) to acclimatize  
727 to the experimental conditions. After 30 min, dsRNA (200 ng/bee for *TRP*, 2 µg/bee for *TRPR*)  
728 was microinjected into the head of honeybees via the central ocellus using a glass capillary  
729 needle coupled microinjector. dsRNA of green fluorescent protein gene (*dsGFP*, 2 µg/bee)  
730 was used as control in all RNAi experiments. All harnessed bees were fed with 50% sucrose  
731 solution every 12 hours. At 0, 12, 24, and 48 hours after injection, a group of 6 individual  
732 bees were collected from each injection group (*dsTRP*, *dsTRPR*, and *dsGFP*) for comparing  
733 *TRP* and *TRPR* expression. Individual brains were carefully dissected and frozen at -80°C  
734 until RNA extraction. Three independent replicate groups per condition were collected and  
735 qRT-PCR was performed to calculate the RNAi efficiency. Total RNA was isolated using  
736 TRIzol reagent (Takara, Japan). Total RNA quantification was performed by NanoDrop 2000  
737 spectrophotometer (Thermo Fisher Scientific), and the quality of RNA was evaluated by 1.0%  
738 denaturing agarose gel electrophoresis. Reverse transcription was performed using a  
739 PrimeScript™ RT reagent kit (Takara), according to the manufacturer's instructions.  
740 Gene-specific mRNA levels were assessed by qPCR using TB Green Fast qPCR Mix (Takara)  
741 on a LightCycler 480II instrument (Roche, Switzerland). The *β-actin* gene was used as a  
742 reference gene. After verifying amplification efficiency of the selected genes and *β-actin*

743 (from 96.8% to 100.5%), the differences in gene expression levels were calculated using the  
744  $2^{-\Delta\Delta Ct}$  method. Pairwise differences in gene expression were considered significant at  $p < 0.05$ ,  
745 using one-way ANOVA (SPSS Statistics 20.0). The primers used for qPCR are shown in  
746 Table S11.

747 After determination of knockdown efficiencies (see results), 24 hours post-injection was  
748 chosen as the timepoint to study the PER effects of dsRNA-mediated knockdown of *TRP* and  
749 *TRPR*. About 200 bees of each behavioral phenotype (NBs, PFs, and NFs of AML) were  
750 collected in the morning, harnessed, and remained in a dark incubator to acclimatize. After 30  
751 min, all surviving bees of each behavioral phenotype were evenly divided into three groups,  
752 injected with *dsTRP*, *dsTRPR*, and *dsGFP* and kept as described above. After 24 hours, all  
753 surviving bees were assayed for their PER to stimulations of sucrose solution, pollen, or  
754 larvae as described in section 4.2. Each stimulus was assessed with a new set of bees  
755 containing about 55 individuals for each treatment group (*dsTRP*, *dsTRPR*, and *dsGFP*). The  
756 SRSs of the *TPR*-knockdown, *TRPR*-knockdown, and control groups were compared using  
757 Kruskal-Wallis tests with Bonferroni correction for each behavioral phenotype separately.  
758 The sucrose responsiveness was further compared between the different groups at the same  
759 sucrose concentration with independent Chi-square tests. The responsiveness to pollen and  
760 larvae was compared between the *TPR*-knockdown, *TRPR*-knockdown, and control groups  
761 using independent Chi-square tests for each behavioral phenotype separately. All statistical  
762 analyses were performed with SPSS Statistics 20.0 (IBM).

763 **4.7. Effects of TRP2 injection and RNAi-mediated downregulation of *TRP* and *TRPR* on**

764 **ERK signaling in honeybee workers**

765 To test whether manipulating TRP/TRPR signaling has effect on honeybee ERK signaling a  
766 group of 10 individual worker bees were collected from each injection group (ddH<sub>2</sub>O, TRP2,  
767 ds*TRP*, ds*TRPR*, and ds*GFP*) to compare ERK phosphorylation levels. Three independent  
768 replicate groups per condition were collected and Western blot analyses were performed:  
769 Honeybeebrains were carefully dissected and frozen at -80°C until protein extraction. Brain  
770 protein extractions were carried out according to our previously described method with some  
771 modifications. Briefly, the larvae were homogenized with lysis buffer (LB, 8 M urea, 2 M  
772 thiourea, 4% CHAPS, 20 mM Tris-base, 30 mM dithiothreitol). The mixture was  
773 homogenized for 30 min on ice and sonicated 20 s per 5 min during this time, then  
774 centrifuged at 12 000g and 4 °C for 10 min. Ice-cold acetone were added to the collected  
775 supernatants, and then the mixture was kept on ice for 30 min for protein precipitation.  
776 Subsequently, the mixture was centrifuged at 12 000g and 4 °C for 10 min. The supernatant  
777 was discarded and the pellets were resolved in LB and kept at -20°C for further use. Western  
778 blot analyses were performed as described in section 4.4.4.

779 **Data Availability**

780 Original data have been deposited to ProteomeXchange Consortium with the dataset identifier  
781 PXD018713 under <http://proteomecentral.proteomexchange.org>. Other data not provided in the  
782 supplementary materials and materials are available from the first author upon request.

783 **Acknowledgments**

784 We appreciate Dr. Huipeng Yang at Institute of Apicultural Research for kind gifts of vectors.

785 **Competing Interests**

786 None of the authors have any competing interests.

787 **References**

- 788 1. Darwin C. On the origin of species by means of natural selection. London, UK: John  
789 Murray; 1859.
- 790 2. Dall SRX, Houston AI, McNamara JM. The behavioural ecology of personality: consistent  
791 individual differences from an adaptive perspective. *Ecol Lett.* 2004;7(8):734-9. doi:  
792 10.1111/j.1461-0248.2004.00618.x
- 793 3. Bolnick DI, Svanbäck R, Fordyce JA, Yang LH, Davis JM, Hulseley CD, et al. The ecology  
794 of individuals: incidence and implications of individual specialization. *Am Nat.*  
795 2003;161(1):1-28.
- 796 4. West-Eberhard MJ. Phenotypic plasticity and the origins of diversity. *Annu Rev Ecol Syst.*  
797 1989;20(1):249-78.
- 798 5. Arnold SJ. Constraints on phenotypic evolution. *Am Nat.* 1992;140:S85-S107.
- 799 6. Sih A, Bell A, Johnson JC. Behavioral syndromes: an ecological and evolutionary  
800 overview. *Trends Ecol Evol.* 2004;19:372-8. doi: 10.1016/j.tree.2004.04.009
- 801 7. O'Connell LA, Hofmann HA. Genes, hormones, and circuits: an integrative approach to  
802 study the evolution of social behavior. *Front Neuroendocrin.* 2011;32(3):320-35. doi:  
803 10.1016/j.yfrne.2010.12.004

- 804 8. Kim SM, Su C-Y, Wang JW. Neuromodulation of innate behaviors in *Drosophila*. *Annu Rev*  
805 *Neurosci.* 2017;40:327-48. doi: 10.1146/annurev-neuro-072116-031558
- 806 9. Oliveira RF. Social behavior in context: Hormonal modulation of behavioral plasticity and  
807 social competence. *Integr Comp Biol.* 2009;49(4):423-40. doi: 10.1093/icb/icp055.
- 808 10. Gronenberg W, Riveros AJ. Social brains and behavior: past and present. In: Gadau J.  
809 Fewell J. (Eds), *Organization of insect societies: from genome to sociocomplexity*. Harvard  
810 University Press; Cambridge MA. 2009; p. 377-401.
- 811 11. Oster GF, Wilson EO. *Caste and ecology in the social insects*. Princeton University Press;  
812 Princeton NJ; 1978.
- 813 12. Jeanson R, Weidenmuller A. Interindividual variability in social insects-proximate causes  
814 and ultimate consequences. *Biol Rev Camb Philos Soc.* 2014;89(3):671-87. doi:  
815 10.1111/brv.12074.
- 816 13. Rueppell O, Fondrk MK, Page Jr. RE. Male behavioural maturation rate responds to  
817 selection on pollen hoarding in honey bees. *Anim Behav.* 2006;71:227-34. doi:  
818 10.1016/j.anbehav.2005.05.008.
- 819 14. Jandt JM, Bengtson S, Pinter-Wollman N, Pruitt JN, Raine NE, Dornhaus A, et al.  
820 Behavioural syndromes and social insects: personality at multiple levels. *Biol Rev.*  
821 2014;89(1):48-67. doi: 10.1111/brv.12042.
- 822 15. Tinbergen N. *The Study of Instinct*: Clarendon Press/Oxford University Press; Oxford, UK.  
823 1951.
- 824 16. Mayr E. *Behavior Programs and Evolutionary Strategies: Natural selection sometimes*  
825 *favors a genetically "closed" behavior program, sometimes an "open" one.* *Am Sci.*



- 826 1974;62(6):650-9.
- 827 17.Ricklefs RE, Wikelski M. The physiology/life-history nexus. Trends Ecol Evol.  
828 2002;17(10):462-8. doi: 10.1016/S0169-5347(02)02578-8.
- 829 18.Bargmann CI. Beyond the connectome: how neuromodulators shape neural circuits.  
830 Bioessays. 2012;34(6):458-65. doi: 10.1002/bies.201100185
- 831 19.Bargmann CI, Marder E. From the connectome to brain function. Nat Meth. 2013;10(6):483.  
832 doi: 10.1038/nmeth.2451.
- 833 20.Scheiner R, Page Jr. RE, Erber J. Sucrose responsiveness and behavioral plasticity in  
834 honey bees (*Apis mellifera*). Apidologie. 2004;35(2):133-42. doi: 10.1051/apido:2004001.
- 835 21.Theraulaz G, Bonabeau E, Deneubourg JN. Response threshold reinforcements and  
836 division of labour in insect societies. Proceedings of the Royal Society of London Series B:  
837 Biological Sciences. 1998;265(1393):327-32.
- 838 22.Beshers SN, Robinson GE, Mitterthaler JE. Response thresholds and division of labor in  
839 insect colonies. In: Detrain C, Deneubourg JL, Pasteels JM (Eds). Information Processing  
840 in Social Insects: Springer, Basel; 1999. p. 115-39.
- 841 23.Robinson GE. Regulation of division of labor in insect societies. Annu Rev Entomol.  
842 1992;37:637-65.
- 843 24.Page Jr. RE, Rueppell O, Amdam GV. Genetics of reproduction and regulation of  
844 honeybee (*Apis mellifera* L.) social behavior. Annu Rev Genet. 2012;46:97-119. doi:  
845 10.1146/annurev-genet-110711-155610.
- 846 25.Johnson BR. Division of labor in honeybees: form, function, and proximate mechanisms.  
847 Behav Ecol Sociobiol. 2010;64(3):305-16. doi: 10.1007/s00265-009-0874-7.

- 848 26. Seeley TD. Adaptive significance of the age polyethism schedule in honeybee colonies.  
849 Behav Ecol Sociobiol. 1982;11:287-93.
- 850 27. Johnson BR. Within-nest temporal polyethism in the honey bee. Behav Ecol Sociobiol.  
851 2008;62(5):777-84. doi: 10.1007/s00265-007-0503-2.
- 852 28. Page Jr RE, Fondrk MK, Hunt GJ, Guzman-Novoa E, Humphries MA, Nguyen K, et al.  
853 Genetic dissection of honeybee (*Apis mellifera* L.) foraging behavior. J Hered.  
854 2000;91(6):474-479. doi: 10.1093/jhered/91.6.474.
- 855 29. Pankiw T. Cued in: honey bee pheromones as information flow and collective  
856 decision-making. Apidologie. 2004;35(2):217-26. doi: 10.1051/apido:2004009.
- 857 30. Değirmenci L, Thamm M, Scheiner R. Responses to sugar and sugar receptor gene  
858 expression in different social roles of the honeybee (*Apis mellifera*). J Insect Physiol.  
859 2018;106:65-70. doi: 10.1016/j.jinsphys.2017.09.009.
- 860 31. Ben-Shahar Y, Leung H-T, Pak WL, Sokolowski MB, Robinson GE. cGMP-dependent  
861 changes in phototaxis: a possible role for the foraging gene in honey bee division of labor. J  
862 Exp Biol. 2003;206:2507-15. doi: 10.1242/jeb.00442.
- 863 32. Page Jr. RE, Erber J, Fondrk MK. The effect of genotype on response thresholds to  
864 sucrose and foraging behavior of honey bees (*Apis mellifera* L.). J Comp Physiol A.  
865 1998;182:489-500.
- 866 33. Pankiw T, Page Jr RE. The effect of genotype, age, sex, and caste on response thresholds  
867 to sucrose and foraging behavior of honey bees (*Apis mellifera* L.). J Comp Physiol A.  
868 1999;185(2):207-13.
- 869 34. Nicholls E, De Ibarra NH. Pollen elicits proboscis extension but does not reinforce PER

- 870 learning in honeybees. *Insects*. 2013;4(4):542-57. doi: 10.3390/insects4040542.
- 871 35.Zhang X, Hu H, Han B, Wei Q, Meng L, Wu F, et al. The neuroproteomic basis of enhanced  
872 perception and processing of brood signals that trigger increased reproductive investment  
873 in honeybee (*Apis mellifera*) workers. *Mol Cell Proteomics*. 2020;19(10):1632-1648. doi:  
874 10.1074/mcp.RA120.002123.
- 875 36.Giurfa M, Sandoz J-C. Invertebrate learning and memory: fifty years of olfactory  
876 conditioning of the proboscis extension response in honeybees. *Learn Memory*.  
877 2012;19(2):54-66. doi: 10.1101/lm.024711.111.
- 878 37.Scheiner R, Baumann A, Blenau W. Aminergic control and modulation of honeybee  
879 behaviour. *Curr Neuropharmacol*. 2006;4(4):259-76. doi: 10.2174/157015906778520791.
- 880 38.Nässel DR. Neuropeptides in the nervous system of *Drosophila* and other insects: multiple  
881 roles as neuromodulators and neurohormones. *Prog Neurobiol*. 2002;68(1):1-84. doi:  
882 10.1016/S0301-0082(02)00057-6.
- 883 39.Schoofs L, De Loof A, Van Hiel MB. Neuropeptides as regulators of behavior in insects.  
884 *Annu Rev Entomol*. 2017;62:35-52. doi: 10.1146/annurev-ento-031616-035500.
- 885 40.Ament SA, Wang Y, Robinson GE. Nutritional regulation of division of labor in honey bees:  
886 toward a systems biology perspective. *Wires Syst Biol Med*. 2010;2(5):566-76. doi:  
887 10.1002/wsbm.73.
- 888 41.Shankar S, Chua JY, Tan KJ, Calvert ME, Weng R, Ng WC, et al. The neuropeptide  
889 tachykinin is essential for pheromone detection in a gustatory neural circuit. *Elife*.  
890 2015;4:e06914. doi: 10.7554/eLife.06914.
- 891 42.Gendron CM, Kuo T-H, Harvanek ZM, Chung BY, Yew JY, Dierick HA, et al. *Drosophila* life

- 892 span and physiology are modulated by sexual perception and reward. *Science*.
- 893 2014;343(6170):544-8. doi: 10.1126/science.1243339.
- 894 43. Inagaki HK, Panse KM, Anderson DJ. Independent, reciprocal neuromodulatory control of
- 895 sweet and bitter taste sensitivity during starvation in *Drosophila*. *Neuron*.
- 896 2014;84(4):806-20. doi: 10.1016/j.neuron.2014.09.032.
- 897 44. Taghert PH, Nitabach MN. Peptide neuromodulation in invertebrate model systems.
- 898 *Neuron*. 2012;76(1):82-97. doi: 10.1016/j.neuron.2012.08.035.
- 899 45. Han B, Fang Y, Feng M, Hu H, Qi Y, Huo X, et al. Quantitative neuropeptidome analysis
- 900 reveals neuropeptides are correlated with social behavior regulation of the honeybee
- 901 workers. *J Proteome Res*. 2015;14(10):4382-93. doi: 10.1021/acs.jproteome.5b00632.
- 902 46. Boerjan B, Cardoen D, Bogaerts A, Landuyt B, Schoofs L, Verleyen P. Mass spectrometric
- 903 profiling of (neuro)-peptides in the worker honeybee, *Apis mellifera*. *Neuropharmacology*.
- 904 2010;58(1):248-58. doi: 10.1016/j.neuropharm.2009.06.026.
- 905 47. Pratavieira M, Menegasso ARdS, Esteves FG, Sato KU, Malaspina O, Palma MS. MALDI
- 906 imaging analysis of neuropeptides in africanized honeybee (*Apis mellifera*) brain: effect of
- 907 aggressiveness. *J Proteome Res*. 2018;17(7):2358-69. doi:
- 908 10.1021/acs.jproteome.8b00098.
- 909 48. Brockmann A, Annangudi SP, Richmond TA, Ament SA, Xie F, Southey BR, et al.
- 910 Quantitative peptidomics reveal brain peptide signatures of behavior. *Proc Natl Acad Sci U*
- 911 *S A*. 2009;106(7):2383-8. doi: 10.1073/pnas.0813021106.
- 912 49. Pratavieira M, da Silva Menegasso AR, Garcia AMC, dos Santos DSe, Gomes PC,
- 913 Malaspina O, et al. MALDI imaging analysis of neuropeptides in the Africanized honeybee

- 914 (*Apis mellifera*) brain: effect of ontogeny. J Proteome Res. 2014;13(6):3054-64. doi:  
915 10.1021/pr500224b.
- 916 50. Burbach JPH. What are neuropeptides? Neuropeptides: Springer; 2011. p. 1-36.
- 917 51. Hokfelt T, Broberger C, Xu ZQ, Sergeev V, Ubink R, Diez M. Neuropeptides--an overview.  
918 Neuropharmacology. 2000;39(8):1337-56. doi: 10.1016/s0028-3908(00)00010-1.
- 919 52. Ko KI, Root CM, Lindsay SA, Zaninovich OA, Shepherd AK, Wasserman SA, et al.  
920 Starvation promotes concerted modulation of appetitive olfactory behavior via parallel  
921 neuromodulatory circuits. Elife. 2015;4: e08298. doi: 10.7554/eLife.08298.
- 922 53. Winther ÅME, Acebes A, Ferrús A. Tachykinin-related peptides modulate odor perception  
923 and locomotor activity in *Drosophila*. Mol Cell Neurosci. 2006;31(3):399-406. doi:  
924 10.1016/j.mcn.2005.10.010.
- 925 54. Gui SH, Jiang HB, Xu L, Pei YX, Liu XQ, Smaghe G, et al. Role of a tachykinin-related  
926 peptide and its receptor in modulating the olfactory sensitivity in the oriental fruit fly,  
927 *Bactrocera dorsalis* (Hendel). Insect Biochem Mol Biol. 2017;80:71-8. doi:  
928 10.1016/j.ibmb.2016.12.002.
- 929 55. Asahina K, Watanabe K, Duistermars BJ, Hoopfer E, González CR, Eyjólfsson EA, et al.  
930 Tachykinin-expressing neurons control male-specific aggressive arousal in *Drosophila*. Cell.  
931 2014;156(1-2):221-35. doi: 10.1016/j.cell.2013.11.045.
- 932 56. Takeuchi H, Yasuda A, Yasuda-Kamatani Y, Sawata M, Matsuo Y, Kato A, et al.  
933 Prepro-tachykinin gene expression in the brain of the honeybee *Apis mellifera*. Cell Tissue  
934 Res. 2004;316(2):281-293. doi: 10.1007/s00441-004-0865-y.
- 935 57. Takeuchi H, Yasuda A, Yasuda-Kamatani Y, Kubo T, Nakajima T. Identification of a

- 936 tachykinin-related neuropeptide from the honeybee brain using direct MALDI-TOF MS and  
937 its gene expression in worker, queen and drone heads. *Insect Mol Biol.* 2003;12(3):291-8.  
938 doi: 10.1046/j.1365-2583.2003.00414.x.
- 939 58. Hauser F, Cazzamali G, Williamson M, Blenau W, Grimmelikhuijzen CJP. A review of  
940 neurohormone GPCRs present in the fruitfly *Drosophila melanogaster* and the honey bee  
941 *Apis mellifera*. *Prog Neurobiol.* 2006;80(1):1-19. doi: 10.1016/j.pneurobio.2006.07.005.
- 942 59. Birse RT, Johnson EC, Taghert PH, Nässel DR. Widely distributed *Drosophila* G-protein-  
943 coupled receptor (CG7887) is activated by endogenous tachykinin-related peptides. *J*  
944 *Neurobiol.* 2006;66(1):33-46. doi: 10.1002/neu.20189.
- 945 60. He X, Zang J, Li X, Shao J, Yang H, Yang J, et al. Activation of BNGR-A24 by direct  
946 interaction with tachykinin-related peptides from the silkworm *Bombyx mori* leads to the  
947 Gq- and Gs-coupled signaling cascades. *Biochemistry.* 2014;53(42):6667-78. doi:  
948 10.1021/bi5007207.
- 949 61. Poels J, Verlinden H, Fichna J, Van Loy T, Franssens V, Studzian K, et al. Functional  
950 comparison of two evolutionary conserved insect neurokinin-like receptors. *Peptides.*  
951 2007;28(1):103-8. doi: 10.1016/j.peptides.2006.06.014.
- 952 62. Rozengurt E. Mitogenic signaling pathways induced by G protein-coupled receptors. *J Cell*  
953 *Physiol.* 2007;213(3):589-602. doi: 10.1002/jcp.21246.
- 954 63. Lee K-S, Kwon O-Y, Lee JH, Kwon K, Min K-J, Jung S-A, et al. *Drosophila* short  
955 neuropeptide F signalling regulates growth by ERK-mediated insulin signalling. *Nat Cell*  
956 *Biol.* 2008;10(4):468-75. doi: 10.1038/ncb1710.
- 957 64. Ament SA, Corona M, Pollock HS, Robinson GE. Insulin signaling is involved in the

- 958 regulation of worker division of labor in honey bee colonies. Proc Natl Acad Sci U S A.  
959 2008;105(11):4226-31. doi: 10.1073/pnas.0800630105.
- 960 65. Robinson GE. Regulation of honey bee age polyethism by juvenile hormone. Behav Ecol  
961 Sociobiol. 1987;20(5):329-38.
- 962 66. Wang Y, Brent CS, Fennern E, Amdam GV. Gustatory perception and fat body energy  
963 metabolism are jointly affected by vitellogenin and juvenile hormone in honey bees. PLoS  
964 Genet. 2012;8(6). doi: 10.1371/journal.pgen.1002779.
- 965 67. Toth AL, Robinson GE. Worker nutrition and division of labour in honeybees. Anim Behav.  
966 2005;69(2):427-35. doi: 10.1016/j.anbehav.2004.03.017.
- 967 68. Hunt GJ, Amdam GV, Schlipalius D, Emore C, Sardesai N, Williams CE, et al. Behavioral  
968 genomics of honeybee foraging and nest defense. Naturwissenschaften.  
969 2007;94(4):247-67. doi: 10.1007/s00114-006-0183-1.
- 970 69. Wang Y, Amdam GV, Rueppell O, Wallrichs MA, Fondrk MK, Kaftanoglu O, et al. PDK1  
971 and HR46 gene homologs tie social behavior to ovary signals. PLoS One. 2009;4(4):e4899.  
972 doi: 10.1371/journal.pone.0004899.
- 973 70. Pankiw T, Page Jr RE. Response thresholds to sucrose predict foraging division of labor in  
974 honeybees. Behav Ecol Sociobiol. 2000;47(4):265-7. doi: 10.1007/s002650050664.
- 975 71. Grüter C, Arenas A, Farina WM. Does pollen function as a reward for honeybees in  
976 associative learning? Insect Soc. 2008;55(4):425-7. doi: 10.1007/s00040-008-1022-5.
- 977 72. Khsai L, Kapan N, Dircksen H, Winther ÅME, Nässel DR. Metabolic stress responses in  
978 *Drosophila* are modulated by brain neurosecretory cells that produce multiple  
979 neuropeptides. PLoS One. 2010;5(7):e11480. doi: 10.1371/journal.pone.0011480.

- 980 73. Jung JW, Kim J-H, Pfeiffer R, Ahn Y-J, Page TL, Kwon HW. Neuromodulation of olfactory  
981 sensitivity in the peripheral olfactory organs of the American cockroach, *Periplaneta*  
982 *americana*. PLoS One. 2013;8(11). doi: 10.1371/journal.pone.0081361.
- 983 74. Sih A, Bell A, Johnson JC. Behavioral syndromes: an ecological and evolutionary overview.  
984 Trends Ecol Evol. 2004;19(7):372-8. doi: 10.1016/j.tree.2004.04.009.
- 985 75. Oldroyd BP, Wongsiri S. Asian honey bees: biology, conservation, and human interactions.  
986 Cambridge, MA: Harvard University Press; 2009.
- 987 76. Hepburn HR, Radloff SE. Honeybees of Asia. Berlin, Heidelberg: Springer; 2011.
- 988 77. Rueppell O, Hunggims E, Tingek S. Association between larger ovaries and pollen foraging  
989 in queenless *Apis cerana* workers supports the reproductive ground-plan hypothesis of  
990 social evolution. J Insect Behav. 2008;21(4):317-21. doi: 10.1007/s10905-008-9135-2.
- 991 78. Yang W, Kuang H, Wang S, Wang J, Liu W, Wu Z, et al. Comparative sucrose  
992 responsiveness in *Apis mellifera* and *A. cerana* foragers. PLoS One. 2013;8(10):e79026.  
993 doi: 10.1371/journal.pone.0079026.
- 994 79. Qin QH, He XJ, Tian LQ, Zhang SW, Zeng ZJ. Comparison of learning and memory of *Apis*  
995 *cerana* and *Apis mellifera*. J Comp Physiol A. 2012;198(10):777-86. doi:  
996 10.1007/s00359-012-0747-9.
- 997 80. Tan K, Yang MX, Radloff SE, Hepburn HR, Zhang ZY, Luo LJ, et al. Dancing to different  
998 tunes: heterospecific deciphering of the honeybee waggle dance. Naturwissenschaften.  
999 2008;95(12):1165-8. doi: 10.1007/s00114-008-0437-1.
- 1000 81. Ruttner F. Biogeography and taxonomy of honeybees: Berlin, Germany: Springer; 1988;  
1001 p.284.



- 1002 82.Wang Z, Tan K. Comparative analysis of olfactory learning of *Apis cerana* and *Apis*  
1003 *mellifera*. *Apidologie*. 2014;45(1):45-52. doi: 10.1007/s13592-013-0228-3.
- 1004 83.Pankiw T, Waddington KD, Page Jr RE. Modulation of sucrose response thresholds in  
1005 honey bees (*Apis mellifera* L.): influence of genotype, feeding, and foraging experience. *J*  
1006 *Comp Physiol A*. 2001;187(4):293-301. doi: 10.1007/s003590100201.
- 1007 84.Scheiner R, Plückhahn S, Öney B, Blenau W, Erber J. Behavioural pharmacology of  
1008 octopamine, tyramine and dopamine in honey bees. *Behav Brain Res*. 2002;136(2):545-53.  
1009 doi: 10.1016/S0166-4328(02)00205-X.
- 1010 85.Scheiner R, Barnert M, Erber J. Variation in water and sucrose responsiveness during the  
1011 foraging season affects proboscis extension learning in honey bees. *Apidologie*.  
1012 2003;34(1):67-72. doi: 10.1051/apido:2002050.
- 1013 86.Lin H, He L, Ma B. A combinatorial approach to the peptide feature matching problem for  
1014 label-free quantification. *Bioinformatics*. 2013;29(14):1768-75. doi:  
1015 10.1093/bioinformatics/btt274.

## 1016 **Supplementary Materials**

- 1017 Fig. S1. Efficiencies of dsRNA-mediated knockdown of *TRP* and *TRPR*.
- 1018 Table S1. The proboscis extension response of different behavioral phenotypes to different  
1019 sucrose solutions.
- 1020 Table S2. Statistical differences in sucrose responsiveness of different behavioral phenotypes.
- 1021 Table S3. Neuropeptides identified in the brain of *Apis mellifera ligustica* workers.
- 1022 Table S4. Neuropeptides identified in the brain of *Apis cerana cerana* workers.
- 1023 Table S5. Quantitative neuropeptide comparison of different behavioral phenotypes of *Apis*

1024 *mellifera ligustica* workers.

1025 Table S6. Quantitative neuropeptide comparison of different behavioral phenotypes of *Apis*  
1026 *cerana cerana* workers.

1027 Table S7. Quantitative neuropeptide comparison between *Apis cerana cerana* and *Apis mellifera*  
1028 *ligustica*.

1029 Table S8. The proboscis extension response of workers after injection of ddH<sub>2</sub>O and TRP2.

1030 Table S9. The proboscis extension response of workers after injection of ds*GFP*, ds*TRP*, and  
1031 ds*TRPR*.

1032 Table S10. Statistical differences in sucrose responsiveness after injection of ds*GFP*, ds*TRP*, and  
1033 ds*TRPR*.

1034 Table S11. Sequence information of primers used in this study.

**Fig S1**

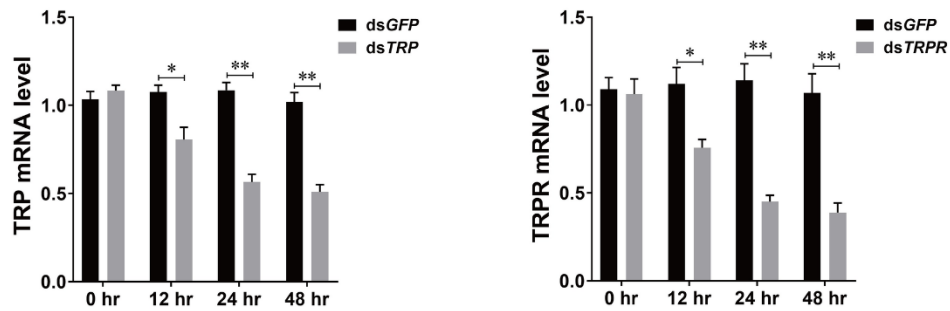

**Fig S1. Efficiencies of dsRNA-mediated knockdown of *TRP* and *TRPR*.** dsRNA (200 ng/bee for *TRP*, 2  $\mu$ g/bee for *TRPR*) was microinjected into the head of honeybees via the central ocellus using a microinjector. dsRNA of green fluorescent protein gene (*dsGFP*, 2  $\mu$ g/bee) was used as control. At 0, 12, 24, and 48 hours after injection, a group of 6 individual bees were collected from each injection group. Three independent replicate groups per condition were collected and qRT-PCR was performed to calculate the RNAi efficiency. Student's t-tests were used for pairwise comparisons (\* $p$ <0.05, \*\* $p$ <0.01, \*\*\* $p$ <0.001).

**Table S1. The proboscis extension response of different behavioral phenotypes to different sucrose solutions.** The proboscis extension response of *Apis mellifera ligustica* (AML) and *Apis cerana cerana* (ACC) worker bees to different sucrose solutions.

| AML pollen foragers |          |        |           | ACC pollen foragers |          |        |           |
|---------------------|----------|--------|-----------|---------------------|----------|--------|-----------|
| Concentration       | Show PER | No PER | PER ratio | Concentration       | Show PER | No PER | PER ratio |
| 0.1%                | 48       | 79     | 37.80%    | 0.1%                | 33       | 92     | 26.40%    |
| 0.3%                | 51       | 76     | 40.16%    | 0.3%                | 35       | 90     | 28.00%    |
| 1.0%                | 70       | 57     | 55.12%    | 1.0%                | 51       | 74     | 40.80%    |
| 3.0%                | 83       | 44     | 65.35%    | 3.0%                | 59       | 66     | 47.20%    |
| 10.0%               | 87       | 40     | 68.50%    | 10.0%               | 68       | 57     | 54.40%    |
| 30.0%               | 111      | 16     | 87.40%    | 30.0%               | 98       | 27     | 78.40%    |
| Pollen              | 32       | 50     | 39.02%    | Pollen              | 20       | 66     | 23.26%    |
| Larva               | 17       | 65     | 20.73%    | Larva               | 11       | 75     | 12.79%    |

  

| AML nectar foragers |          |        |           | ACC nectar foragers |          |        |           |
|---------------------|----------|--------|-----------|---------------------|----------|--------|-----------|
| Concentration       | Show PER | No PER | PER ratio | Concentration       | Show PER | No PER | PER ratio |
| 0.1%                | 23       | 107    | 17.69%    | 0.1%                | 17       | 111    | 13.28%    |
| 0.3%                | 33       | 97     | 25.38%    | 0.3%                | 19       | 109    | 14.84%    |
| 1.0%                | 38       | 92     | 29.23%    | 1.0%                | 23       | 105    | 17.97%    |
| 3.0%                | 44       | 86     | 33.85%    | 3.0%                | 29       | 99     | 22.66%    |
| 10.0%               | 59       | 71     | 45.38%    | 10.0%               | 44       | 84     | 34.38%    |
| 30.0%               | 68       | 62     | 52.31%    | 30.0%               | 55       | 73     | 42.97%    |
| Pollen              | 11       | 74     | 12.94%    | Pollen              | 8        | 77     | 9.41%     |
| Larva               | 15       | 70     | 17.65%    | Larva               | 9        | 76     | 10.59%    |

**AML nurse bees**

| <b>Concentration</b> | <b>Show PER</b> | <b>No PER</b> | <b>PER ratio</b> |
|----------------------|-----------------|---------------|------------------|
| <b>0.1%</b>          | <b>30</b>       | <b>106</b>    | <b>22.06%</b>    |
| <b>0.3%</b>          | <b>32</b>       | <b>104</b>    | <b>23.53%</b>    |
| <b>1.0%</b>          | <b>45</b>       | <b>91</b>     | <b>33.09%</b>    |
| <b>3.0%</b>          | <b>50</b>       | <b>86</b>     | <b>36.76%</b>    |
| <b>10.0%</b>         | <b>57</b>       | <b>79</b>     | <b>41.91%</b>    |
| <b>30.0%</b>         | <b>75</b>       | <b>61</b>     | <b>55.15%</b>    |
| <b>Pollen</b>        | <b>9</b>        | <b>82</b>     | <b>9.89%</b>     |
| <b>Larva</b>         | <b>36</b>       | <b>55</b>     | <b>39.56%</b>    |

**ACC nurse bees**

| <b>Concentration</b> | <b>Show PER</b> | <b>No PER</b> | <b>PER ratio</b> |
|----------------------|-----------------|---------------|------------------|
| <b>0.1%</b>          | <b>18</b>       | <b>113</b>    | <b>13.74%</b>    |
| <b>0.3%</b>          | <b>19</b>       | <b>112</b>    | <b>14.50%</b>    |
| <b>1.0%</b>          | <b>30</b>       | <b>101</b>    | <b>22.90%</b>    |
| <b>3.0%</b>          | <b>38</b>       | <b>93</b>     | <b>29.01%</b>    |
| <b>10.0%</b>         | <b>48</b>       | <b>83</b>     | <b>36.64%</b>    |
| <b>30.0%</b>         | <b>58</b>       | <b>73</b>     | <b>44.27%</b>    |
| <b>Pollen</b>        | <b>7</b>        | <b>81</b>     | <b>7.95%</b>     |
| <b>Larva</b>         | <b>22</b>       | <b>66</b>     | <b>25.00%</b>    |

**Table S2. Statistical differences in sucrose responsiveness of different behavioral phenotypes.**

| <b>Concentration</b> | <b>0.10%</b> | <b>0.30%</b> | <b>1.00%</b> | <b>3.00%</b> | <b>10.00%</b> | <b>30.00%</b> |
|----------------------|--------------|--------------|--------------|--------------|---------------|---------------|
| <b>AML</b>           |              |              |              |              |               |               |
| PF vs NF             | ***          | *            | ***          | ***          | ***           | ***           |
| PF vs NB             | **           | **           | ***          | ***          | ***           | ***           |
| NF vs NB             | ns           | ns           | ns           | ns           | ns            | ns            |
| <b>ACC</b>           |              |              |              |              |               |               |
| PF vs NF             | **           | **           | ***          | ***          | **            | ***           |
| PF vs NB             | *            | **           | **           | **           | **            | ***           |
| NF vs NB             | ns           | ns           | ns           | ns           | ns            | ns            |
| <b>AML vs ACC</b>    |              |              |              |              |               |               |
| PF                   | ns           | *            | *            | **           | *             | ns            |
| NF                   | ns           | *            | *            | *            | ns            | ns            |
| NB                   | ns           | ns           | ns           | ns           | ns            | ns            |

AML: *Apis mellifera ligustica*, ACC: *Apis cerana cerana*, PF: pollen forager, NF: nectar forager, NB: nurse bee. ns =  $P > 0.05$ , \* $P < 0.05$ , \*\* $P < 0.01$ , \*\*\* $P < 0.001$

**Table S3. Neuropeptides identified in the brain of *Apis mellifera ligustica* workers.** "NB" is nurse bee. "PF" is pollen forager. "NF" is nectar forager. "Protein Accession" is the unique number given to mark the entry of a protein in the database NCBIInr. "Peptide" is the amino acid sequence of the peptide as determined in PEAKS Search. "-10lgP" is the score indicates the scoring significance of a peptide-spectrum match. "Mass" is monoisotopic mass of the peptide. "ppm" is precursor mass error, calculated as  $10^6 \times (\text{precursor mass} - \text{peptide mass}) / \text{peptide mass}$ . "m/z" is precursor mass-to-charge ratio. "z" is peptide charge. "RT" is retention time (elution time) of the spectrum as recorded in the data. "#Spec" is the number of scanned spectrums of the peptide. "PTM" is post translational modification types present in the peptide.

| Sample | Protein Accession | Peptide                        | 10lgP | Mass     | ppm  | m/z      | z | RT    | #Spec | PTM                           |
|--------|-------------------|--------------------------------|-------|----------|------|----------|---|-------|-------|-------------------------------|
| NB     | Q868G6.1          | NSIINDVKNELFPEDIN              | 67.29 | 1972.974 | -0.3 | 987.494  | 2 | 98.51 | 10    |                               |
| NB     | Q868G6.1          | VLSMDGYQNILDKKDELLGEWE         | 61.58 | 2594.257 | -7   | 1298.127 | 2 | 96.42 | 10    |                               |
| NB     | A8CL69.1          | pQLHNIVDKPRQN                  | 51.73 | 1443.758 | 0.7  | 482.2603 | 3 | 13.7  | 6     | Pyro-glu from Q               |
| NB     | A8CL69.1          | pQLHNIVDKPRQNFNDPRF            | 51.12 | 2220.119 | 0.3  | 556.0372 | 4 | 41.34 | 6     | Pyro-glu from Q               |
| NB     | A8CL69.1          | TSQDITSGMWFGPRLa               | 47.39 | 1693.825 | 0.1  | 847.9196 | 2 | 80.85 | 11    | Amidation                     |
| NB     | A8CL69.1          | pQLHNIVDKP                     | 45.99 | 1045.556 | 0.8  | 523.7855 | 2 | 23.83 | 4     | Pyro-glu from Q               |
| NB     | A8CL69.1          | GMWFGPRLa                      | 33.41 | 961.4956 | 0    | 481.7551 | 2 | 68.13 | 9     | Amidation                     |
| NB     | A8CL69.1          | RVPWTSPRLa                     | 30.85 | 1206.699 | 0.3  | 604.3567 | 2 | 25.21 | 6     | Amidation                     |
| NB     | A8CL69.1          | pQITQFTPRL                     | 27.13 | 1085.587 | -0.1 | 543.8007 | 2 | 78.09 | 3     | Pyro-glu from Q               |
| NB     | A8CL69.1          | MWFGPRLa                       | 26.77 | 904.4741 | -0.5 | 453.2441 | 2 | 71.2  | 5     | Amidation                     |
| NB     | A8CL69.1          | QITQFTPRLa                     | 25.1  | 1101.63  | 0.5  | 551.8223 | 2 | 34.24 | 12    | Amidation                     |
| NB     | A8CL69.1          | pQITQFTPRLa                    | 37.99 | 1084.603 | 0    | 543.3087 | 2 | 69.95 | 21    | Pyro-glu from Q;<br>Amidation |
| NB     | ACI90290.1        | TWKSPDIVIRFa                   | 50.93 | 1359.766 | -0.3 | 454.2625 | 3 | 59.62 | 13    | Amidation                     |
| NB     | ACI90290.1        | GRNDLNFIRYa                    | 48.35 | 1265.663 | -0.1 | 633.8386 | 2 | 33.11 | 11    | Amidation                     |
| NB     | NP_001161192.1    | PEIFTSPEELRRYIDHVSDDYLLSGKARYa | 43.49 | 3515.784 | 0.4  | 586.9714 | 6 | 95.9  | 5     | Amidation                     |
| NB     | P85527.1          | QDVDHVFLRFa                    | 55.21 | 1273.657 | 0    | 637.8356 | 2 | 50.66 | 9     | Amidation                     |

|    |          |                                      |       |          |      |          |   |       |    |                               |
|----|----------|--------------------------------------|-------|----------|------|----------|---|-------|----|-------------------------------|
| NB | P85527.1 | pQDVDHVFLRFa                         | 53.95 | 1256.63  | -0.7 | 629.3219 | 2 | 74.39 | 15 | Pyro-glu from Q;<br>Amidation |
| NB | P85527.1 | pQDVDHVFLRF                          | 47.89 | 1257.614 | 0.8  | 629.8148 | 2 | 79.69 | 5  | Pyro-glu from Q               |
| NB | P85527.1 | pQDVDHVFLR                           | 47.86 | 1110.546 | -0.5 | 556.2799 | 2 | 43.23 | 7  | Pyro-glu from Q               |
| NB | P85527.1 | pQDVDHVFL                            | 28.42 | 954.4447 | 1.8  | 478.2305 | 2 | 69.45 | 5  | Pyro-glu from Q               |
| NB | P85798.1 | LRNQLDIGDLQ                          | 50.23 | 1283.683 | -0.5 | 642.8486 | 2 | 42.48 | 10 |                               |
| NB | P85798.1 | IPAADKERLLN                          | 47.66 | 1238.698 | 0.9  | 620.3569 | 2 | 15.09 | 6  |                               |
| NB | P85798.1 | LRNQLDIGDL                           | 38.2  | 1155.625 | 0    | 578.8196 | 2 | 51.53 | 5  |                               |
| NB | P85799.1 | SQAYDPYSNAAQFQLSSQSRGYPYQHRL<br>VY   | 71.75 | 3523.655 | -0.6 | 881.9204 | 4 | 60.92 | 51 |                               |
| NB | P85799.1 | SQAYDPYSNAAQFQLSSQSRGYPYQHRL<br>V    | 70.34 | 3360.591 | -0.4 | 841.1547 | 4 | 57.58 | 11 |                               |
| NB | P85799.1 | SQAYDPYSNAAQFQLSSQSRGYPYQHRL         | 64.21 | 3261.523 | -1.2 | 816.387  | 4 | 53.22 | 8  |                               |
| NB | P85799.1 | LPTNLAEDTKKTEQTMRPKS                 | 55.28 | 2287.184 | 0.1  | 572.8033 | 4 | 21.04 | 22 |                               |
| NB | P85799.1 | GYPYQHRLVY                           | 49.18 | 1294.646 | 0.4  | 648.3304 | 2 | 25.22 | 15 |                               |
| NB | P85799.1 | NVPIYQEPRF                           | 46    | 1261.646 | -0.3 | 631.8298 | 2 | 46.32 | 11 |                               |
| NB | P85799.1 | VPIYQEPRF                            | 43.34 | 1147.603 | -0.1 | 574.8085 | 2 | 42.88 | 6  |                               |
| NB | P85799.1 | PIYQEPRF                             | 28.55 | 1048.534 | 0.4  | 525.2746 | 2 | 46.03 | 7  |                               |
| NB | P85828.1 | ITGQGNRIF                            | 46.68 | 1004.54  | -0.7 | 503.2771 | 2 | 19.63 | 8  |                               |
| NB | P85828.1 | SLKAPFA                              | 41.78 | 732.417  | -0.6 | 367.2155 | 2 | 22.72 | 5  |                               |
| NB | P85828.1 | SLKAPF                               | 36.02 | 661.3799 | 0.3  | 331.6973 | 2 | 23.77 | 4  |                               |
| NB | P85829.1 | MVPVPVHHMADELLRNGPDTVI               | 62.4  | 2439.24  | 0    | 1220.627 | 2 | 76.66 | 17 |                               |
| NB | P85829.1 | VHHMADELLRNGPDTVI                    | 49.65 | 1915.957 | 0.1  | 639.6598 | 3 | 46.23 | 8  |                               |
| NB | P85829.1 | VPVPVHHMADELL                        | 43.49 | 1455.754 | 1.3  | 728.8854 | 2 | 47.73 | 7  |                               |
| NB | P85829.1 | LLRNGPDTVI                           | 35    | 1096.624 | 0.2  | 549.3194 | 2 | 28.64 | 5  |                               |
| NB | P85829.1 | LRNGPDTVI                            | 22.27 | 983.54   | 0.5  | 492.7775 | 2 | 16.98 | 6  |                               |
| NB | P85830.1 | GLDLGLSRGFSGSQAAKHLMLGAAANYA<br>GGPa | 70.62 | 2985.524 | -0.9 | 996.1811 | 3 | 84.68 | 9  | Amidation                     |



|    |          |                              |       |          |      |          |   |       |    |           |
|----|----------|------------------------------|-------|----------|------|----------|---|-------|----|-----------|
| NB | P85830.1 | GLDLGLSRGFSGSQAA             | 62.96 | 1534.774 | 1.2  | 768.3951 | 2 | 55.2  | 6  |           |
| NB | P85830.1 | GLDLGLSRGFSGSQAAKH           | 53.33 | 1799.928 | -0.5 | 600.9829 | 3 | 31.47 | 10 |           |
| NB | P85830.1 | GLDLGLSRGFSGSQAAKHLMa        | 46.31 | 2043.068 | 1    | 682.0308 | 3 | 57.54 | 8  | Amidation |
| NB | P85831.1 | IDLSRFYGHFNT                 | 60.52 | 1468.71  | -0.3 | 735.362  | 2 | 64.92 | 29 |           |
| NB | P85831.1 | IDLSRFYGHFN                  | 56.71 | 1367.662 | -0.1 | 684.8383 | 2 | 62.93 | 18 |           |
| NB | P85831.1 | IDLSRFYGHF                   | 52.75 | 1253.619 | -0.6 | 627.8165 | 2 | 70.59 | 19 |           |
| NB | P85831.1 | IDLSRFYGHFNTRK               | 48.89 | 1752.906 | 0    | 439.2337 | 4 | 43.28 | 23 |           |
| NB | P85831.1 | FYGHFNT                      | 44.93 | 884.3817 | -0.2 | 443.1981 | 2 | 21.44 | 7  |           |
| NB | P85831.1 | DLSRFYGHF                    | 25.85 | 1140.535 | 0.2  | 571.275  | 2 | 70.16 | 3  |           |
| NB | P85831.1 | DLSRFYGHFN                   | 20.23 | 1254.578 | 0.4  | 628.2966 | 2 | 62.68 | 22 |           |
| NB | P85832.1 | LTNYLATTGHGTNTGGPVLT         | 82.04 | 1987.001 | -1.4 | 994.5065 | 2 | 47.57 | 22 |           |
| NB | P85832.1 | LTNYLATTGHGTNTGGPVL          | 69.52 | 1885.953 | -0.6 | 943.9834 | 2 | 52.3  | 4  |           |
| NB | P85832.1 | NLDEIDRVGWSGFV               | 62.73 | 1605.779 | 0.3  | 803.8969 | 2 | 88.41 | 3  |           |
| NB | P85832.1 | LTNYLATTGHGTNTGGPVLTRRFa     | 49.49 | 2445.288 | -0.4 | 816.1028 | 3 | 39.57 | 13 | Amidation |
| NB | P85832.1 | NIDEIDRTAFDNFF               | 46.68 | 1715.779 | -1.2 | 858.8958 | 2 | 96.46 | 9  |           |
| NB | P85832.1 | LVDELSPVSERETLEFa            | 33.35 | 2017.048 | 0.3  | 673.3568 | 3 | 63.4  | 7  | Amidation |
| NB | P85832.1 | ELVDELSPVSERETLEFa           | 30.33 | 2146.091 | 0.6  | 716.3712 | 3 | 74.41 | 9  | Amidation |
| NB | Q06601.1 | GNNRPVYIPQRPHPRL             | 33.24 | 2107.155 | 0.3  | 422.4384 | 5 | 25.01 | 15 |           |
| NB | Q06601.1 | VYIPQRPHPRL                  | 23.32 | 1568.894 | -0.2 | 393.2307 | 4 | 29.92 | 20 |           |
| NB | Q06601.1 | AVHYSGGQPLGSKRPNDMLSQRYHFGLa | 65.31 | 3013.509 | -1.6 | 754.3834 | 4 | 38.67 | 9  | Amidation |
| NB | Q06601.1 | PNDMLSQRYHFGLa               | 66.71 | 1575.762 | 0.3  | 526.2613 | 3 | 56.93 | 13 | Amidation |
| NB | Q06601.1 | AYTYVSEYKRLPVYNFGIa          | 29.98 | 2181.126 | -0.2 | 728.0491 | 3 | 72.4  | 8  | Amidation |
| NB | Q06601.1 | ADYPLRLNLD                   | 48.67 | 1188.614 | 0    | 595.3142 | 2 | 56.85 | 11 |           |
| NB | Q06601.1 | YPLRLNLD                     | 43.48 | 1002.55  | 0.6  | 502.2825 | 2 | 49.18 | 8  |           |
| NB | Q06601.1 | RQYSFGLa                     | 31.09 | 868.4555 | 0    | 435.235  | 2 | 26.91 | 10 | Amidation |

|    |          |                            |       |          |      |          |   |       |    |                               |
|----|----------|----------------------------|-------|----------|------|----------|---|-------|----|-------------------------------|
| NB | Q06601.1 | GRQPYSFGLa                 | 35.27 | 1022.53  | -0.1 | 512.2721 | 2 | 32.39 | 6  | Amidation                     |
| NB | Q06601.1 | GRDYSFGLa                  | 31.03 | 912.4453 | 0    | 457.2299 | 2 | 30.51 | 3  | Amidation                     |
| NB | Q06601.1 | WIDTNDNKRGRDYSFGLa         | 29.02 | 2054.992 | 0    | 686.0047 | 3 | 38.47 | 7  | Amidation                     |
| NB | Q06601.1 | LDYLPVDNPAFH               | 51.58 | 1399.677 | 0.6  | 700.8463 | 8 | 65.51 | 4  |                               |
| NB | Q06602.1 | EAEPEAEPGNNRPVYIPQPRPPHPRL | 50.05 | 2959.505 | -0.5 | 592.908  | 5 | 33.75 | 26 |                               |
| NB | Q06602.1 | GNNRPVYIPQPRPPHPRL         | 33.24 | 2107.155 | 0.3  | 422.4384 | 5 | 25.01 | 15 |                               |
| NB | Q06602.1 | VYIPQPRPPHPRL              | 23.32 | 1568.894 | -0.2 | 393.2307 | 4 | 29.92 | 20 |                               |
| NB | Q5DW47.1 | STSLEELANR                 | 39.7  | 1118.557 | 0.9  | 560.2861 | 2 | 24.18 | 4  |                               |
| NB | Q5DW47.1 | STSLEELANRN                | 38.16 | 1232.6   | 0.7  | 617.3075 | 2 | 23.07 | 5  |                               |
| NB | Q5DW47.1 | pQTFTYSHGWTNa              | 18.99 | 1322.568 | -0.1 | 662.2912 | 2 | 51.14 | 10 | Pyro-glu from Q;<br>Amidation |
| NB | Q868G6.1 | ASFDDEYYKRAPMGFQGMRa       | 55.4  | 2267.025 | 0.5  | 567.7639 | 4 | 45.63 | 9  | Amidation                     |
| NB | Q868G6.1 | APMGFQGMRG                 | 50.96 | 1050.474 | 0    | 526.2442 | 2 | 22.9  | 6  |                               |
| NB | Q868G6.1 | GVMDFQIGLQ                 | 50.62 | 1106.543 | 1    | 554.2793 | 2 | 85.81 | 6  |                               |
| NB | Q868G6.1 | APMGFQGMRa                 | 49.03 | 992.4684 | -1.1 | 497.241  | 2 | 18.87 | 16 | Amidation                     |
| NB | Q868G6.1 | VLSMDGYQNILD               | 47.52 | 1366.644 | 0.6  | 684.3296 | 2 | 80.98 | 15 |                               |
| NB | Q868G6.1 | NPRWEFRGKFGVGRa            | 47.04 | 1745.959 | -0.2 | 437.4969 | 4 | 24.64 | 9  | Amidation                     |
| NB | Q868G6.1 | ARMGFHGMRa                 | 46.29 | 1060.517 | -0.4 | 354.5128 | 3 | 8.86  | 3  | Amidation                     |
| NB | Q868G6.1 | ALMGFQGVRG                 | 46.07 | 1034.533 | 0.1  | 518.2739 | 2 | 35.2  | 6  |                               |
| NB | Q868G6.1 | SPFRYLGA                   | 45.4  | 909.4708 | 0    | 455.7427 | 2 | 36.86 | 10 |                               |
| NB | Q868G6.1 | APMGFYGTRa                 | 45.2  | 997.4803 | -0.1 | 499.7474 | 2 | 16.94 | 3  | Amidation                     |
| NB | Q868G6.1 | APMGFYGTRG                 | 45.18 | 1055.486 | 0.4  | 528.7504 | 2 | 20.63 | 7  |                               |
| NB | Q868G6.1 | ALMGFQGVRa                 | 44.3  | 976.5276 | -0.5 | 489.2709 | 2 | 29.63 | 13 | Amidation                     |
| NB | Q868G6.1 | SPFRYLARG                  | 44.18 | 1122.593 | -0.4 | 375.2049 | 3 | 20.59 | 11 |                               |
| NB | Q868G6.1 | GVMDFQIGLQRKKD             | 44.03 | 1633.861 | -0.2 | 817.9376 | 2 | 35.7  | 14 |                               |
| NB | Q868G6.1 | SPFRYLGARa                 | 43.32 | 1064.588 | 0.2  | 355.87   | 3 | 16.59 | 8  | Amidation                     |

|    |                |                                          |       |          |      |          |   |        |    |                               |
|----|----------------|------------------------------------------|-------|----------|------|----------|---|--------|----|-------------------------------|
| NB | Q868G6.1       | NPRWEFRGKFVGV                            | 42.84 | 1590.842 | 0.1  | 531.288  | 3 | 43.57  | 15 |                               |
| NB | Q868G6.1       | SPFRYLG                                  | 37.59 | 838.4337 | 0    | 420.2241 | 2 | 31.97  | 7  |                               |
| NB | Q868G6.1       | SLEEILDEIK                               | 33.02 | 1187.629 | 0    | 594.8215 | 2 | 88.28  | 6  |                               |
| NB | Q868G6.1       | SLEEILDEI                                | 29.37 | 1059.534 | 0.1  | 530.7741 | 2 | 108.02 | 4  |                               |
| NB | Q868G6.1       | ASFDDEYY                                 | 28.99 | 1008.371 | 0    | 505.1929 | 2 | 43.35  | 4  |                               |
| NB | XP_006557714.1 | pQQFDDYGHLRFa                            | 47.97 | 1406.637 | -2.3 | 704.324  | 2 | 68.3   | 4  | Pyro-glu from Q;<br>Amidation |
| NB | XP_006559359.1 | NVASLARTYTLPQNAa                         | 64.35 | 1616.863 | -1.3 | 809.4379 | 2 | 43.18  | 6  | Amidation                     |
| NB | XP_006559359.1 | SVSSLAKNSAWPVSL                          | 62.69 | 1544.82  | -1.3 | 773.4162 | 2 | 68.52  | 8  |                               |
| NB | XP_006559359.1 | FLLLPATDNNYFHQKLPSSLRSKSL                | 56.55 | 2888.555 | 1    | 578.7188 | 5 | 71.13  | 15 |                               |
| NB | XP_006559359.1 | NVGSVAREHGLPYa                           | 55.04 | 1396.721 | -0.8 | 699.3672 | 2 | 21.03  | 15 | Amidation                     |
| NB | XP_006559359.1 | SVSSLARTGDLPVREQ                         | 53.68 | 1713.901 | 0.5  | 572.3079 | 3 | 25.97  | 12 |                               |
| NB | XP_006559359.1 | YVASLARTGDLPIRGQ                         | 51.94 | 1715.932 | 0.4  | 572.9847 | 3 | 35.62  | 12 |                               |
| NB | XP_006559359.1 | NIASLMRDYDQSRENVPFPa                     | 47.38 | 2406.186 | 0.1  | 803.0695 | 3 | 63.84  | 12 | Amidation                     |
| NB | XP_006559359.1 | HIGALARLGWLP SLRTA                       | 42.32 | 1831.058 | -0.2 | 611.3598 | 3 | 70.88  | 7  |                               |
| NB | XP_006559359.1 | HIGALARLGWLP SLRTARFS                    | 42    | 2221.26  | -0.4 | 556.322  | 4 | 71.36  | 9  |                               |
| NB | XP_006559359.1 | NVGTLARDFALPPa                           | 40.53 | 1368.751 | -0.1 | 685.3829 | 2 | 60.79  | 16 | Amidation                     |
| NB | XP_006559359.1 | YVASLARTGDLPIRa                          | 40.29 | 1529.868 | 0.6  | 510.9635 | 3 | 34.02  | 8  | Amidation                     |
| NB | XP_006559359.1 | GIFLPGSVILR                              | 37.83 | 1170.712 | -0.1 | 586.3634 | 2 | 77.93  | 5  |                               |
| NB | XP_006559359.1 | LPGSVILRALS                              | 36.35 | 1124.692 | 2.1  | 563.3543 | 2 | 72.8   | 8  |                               |
| NB | XP_006559359.1 | GIFLPGSVILRALS RQa                       | 36.3  | 1725.041 | -0.9 | 576.0205 | 3 | 95.14  | 10 | Amidation                     |
| NB | XP_006559359.1 | NVGTLARDFALPPGRRNIASLMRDYDQSR<br>ENRVFPa | 21.57 | 4127.135 | 0.2  | 688.8632 | 6 | 75.08  | 9  | Amidation                     |
| NB | XP_006559865.1 | AFGLLTYPRIa                              | 40.74 | 1148.671 | 0.5  | 575.3428 | 2 | 70.98  | 6  | Amidation                     |
| NB | XP_006559865.1 | SNAPISNLNFN                              | 35.48 | 1189.573 | 0.3  | 595.7938 | 2 | 48.7   | 4  |                               |
| NB | XP_006559865.1 | EKLKPNMRRAFGLLTYPRIa                     | 28.33 | 2301.325 | 0.6  | 576.339  | 4 | 50.2   | 8  | Amidation                     |

|    |                |                                                  |       |          |      |          |   |        |    |                               |
|----|----------------|--------------------------------------------------|-------|----------|------|----------|---|--------|----|-------------------------------|
| NB | XP_006560385.1 | AYRKPPFNCSIFa                                    | 42.26 | 1394.746 | -0.5 | 698.3799 | 2 | 36.92  | 12 | Amidation                     |
| NB | XP_006560385.1 | KPPFNCSIFa                                       | 39.41 | 1004.544 | 0.2  | 503.2795 | 2 | 43.74  | 6  | Amidation                     |
| NB | XP_006560385.1 | RKPPFNCSIFa                                      | 32.35 | 1160.645 | 0    | 581.33   | 2 | 28.38  | 7  | Amidation                     |
| NB | XP_006560385.1 | YRKPPFNCSIFa                                     | 25.22 | 1323.709 | 0.5  | 662.862  | 2 | 36.42  | 6  | Amidation                     |
| NB | XP_006562922.1 | GFKPEYISTAYGFa                                   | 40.22 | 1477.724 | 0.2  | 739.8695 | 2 | 64.18  | 4  | Amidation                     |
| NB | XP_006565207.1 | SDPHLSILSKPMSAIPSYKFDD                           | 81.44 | 2447.204 | 0.4  | 816.7423 | 3 | 71.96  | 17 |                               |
| NB | XP_006565207.1 | SPSLRLRFa                                        | 40.12 | 973.5821 | 0.2  | 487.7984 | 2 | 24.53  | 13 | Amidation                     |
| NB | XP_006565207.1 | SDPHLSILS                                        | 39.05 | 967.4974 | 0.4  | 484.7562 | 2 | 34.74  | 7  |                               |
| NB | XP_006565207.1 | SQRSPSLRLRFa                                     | 38.06 | 1344.774 | 0.4  | 449.2654 | 3 | 16.83  | 10 | Amidation                     |
| NB | XP_006565207.1 | SDPHLSILSKPMSAIP                                 | 32.57 | 1691.892 | -1.1 | 846.9521 | 2 | 64.26  | 4  |                               |
| NB | XP_006570344.1 | NSELINSLGLPKNMNNAa                               | 65.94 | 1940.015 | 0.5  | 971.0152 | 2 | 87.45  | 11 | Amidation                     |
| NB | XP_006570344.1 | LINSLGLPKNMNNAa                                  | 35.9  | 1609.897 | 1.1  | 805.9568 | 2 | 62.46  | 6  | Amidation                     |
| NB | XP_016769998.1 | LVDHRIPDLENEMFDSGNDPGSTVVRT                      | 78.07 | 3012.425 | 0.1  | 754.1135 | 4 | 63.86  | 16 |                               |
| NB | XP_016769998.1 | HPISYNTYDERELSRDHPPLLL                           | 30.5  | 2664.33  | -1.6 | 667.0886 | 4 | 54.55  | 3  |                               |
| NB | XP_016769998.1 | IGSLSIVNSMDVLRQRVLELARRKALQD<br>QAQIDANRRLLLETIa | 27.71 | 4913.782 | -0.3 | 819.9707 | 6 | 98.39  | 12 | Amidation                     |
| PF | Q868G6.1       | NSIINDVKNELFPEDIN                                | 48.21 | 1972.974 | -0.3 | 987.494  | 2 | 100.35 | 14 |                               |
| PF | A8CL69.1       | TSQDITSGMWFGRLa                                  | 42.05 | 1693.825 | 0.5  | 847.92   | 2 | 79     | 22 | Amidation                     |
| PF | A8CL69.1       | pQLHNIVDKPRQN                                    | 37.86 | 1443.758 | 0.3  | 482.2602 | 3 | 14.35  | 3  | Pyro-glu from Q               |
| PF | A8CL69.1       | pQLHNIVDKP                                       | 36.78 | 1045.556 | 0    | 523.7851 | 2 | 25.52  | 6  | Pyro-glu from Q               |
| PF | A8CL69.1       | pQITQFTPRLa                                      | 29.72 | 1084.603 | 0.4  | 543.309  | 2 | 68.45  | 3  | Pyro-glu from Q;<br>Amidation |
| PF | A8CL69.1       | RVPWTPSPRLa                                      | 25.44 | 1206.699 | 1.6  | 604.3575 | 2 | 28.86  | 5  | Amidation                     |
| PF | A8CL69.1       | pQLHNIVDKPRQNFNDPRF                              | 23.63 | 2220.119 | -0.9 | 556.0365 | 4 | 47.19  | 4  | Pyro-glu from Q               |
| PF | A8CL69.1       | QITQFTPRLa                                       | 22.79 | 1101.63  | -0.5 | 551.8218 | 2 | 37.4   | 7  | Amidation                     |
| PF | A8CL69.1       | MWFGPRLa                                         | 20.27 | 904.4741 | -0.2 | 453.2443 | 2 | 75.27  | 10 | Amidation                     |

|    |                |                                    |       |          |      |          |   |       |    |                               |
|----|----------------|------------------------------------|-------|----------|------|----------|---|-------|----|-------------------------------|
| PF | A8CL69.1       | GMWFGPRLa                          | 17.98 | 961.4956 | 0.7  | 481.7554 | 2 | 72.51 | 12 | Amidation                     |
| PF | ACI90290.1     | TWKSPDIVIRFa                       | 42    | 1359.766 | 0.1  | 454.2627 | 3 | 63.04 | 13 | Amidation                     |
| PF | ACI90290.1     | GRNDLNFIRYa                        | 36.79 | 1265.663 | 0.2  | 633.8388 | 2 | 37.18 | 24 | Amidation                     |
| PF | ACI90290.1     | AGFKNLNREQ                         | 35.46 | 1175.605 | 0    | 392.8755 | 3 | 10.1  | 6  |                               |
| PF | ACI90290.1     | SPDIVIRFa                          | 28.69 | 944.5443 | -1.1 | 473.2789 | 2 | 51.32 | 7  | Amidation                     |
| PF | NP_001161192.1 | PEIFTSPEELRRYIDHVSDYYLLSGKARYa     | 45.15 | 3515.784 | 0.4  | 586.9714 | 6 | 95.9  | 8  | Amidation                     |
| PF | P85527.1       | pQDVDHVFLRFa                       | 43.1  | 1256.63  | -0.6 | 629.322  | 2 | 76.1  | 19 | Pyro-glu from Q;<br>Amidation |
| PF | P85527.1       | pQDVDHVFLR                         | 40.39 | 1110.546 | 0.1  | 556.2802 | 2 | 44.76 | 7  | Pyro-glu from Q               |
| PF | P85527.1       | QDVDHVFLRFa                        | 40.1  | 1273.657 | 0.1  | 637.8357 | 2 | 54.09 | 9  | Amidation                     |
| PF | P85527.1       | pQDVDHVFLRF                        | 38.93 | 1257.614 | 0    | 629.8143 | 2 | 82.73 | 8  | Pyro-glu from Q               |
| PF | P85527.1       | pQDVDHVFL                          | 27.57 | 954.4447 | 0.2  | 478.2297 | 2 | 70.88 | 3  | Pyro-glu from Q               |
| PF | P85798.1       | LRNQLDIGDLQ                        | 38.97 | 1283.683 | -1   | 642.8483 | 2 | 44.49 | 12 |                               |
| PF | P85798.1       | IPAADKERLLN                        | 33.42 | 1238.698 | 1.2  | 413.9072 | 3 | 15.96 | 6  |                               |
| PF | P85798.1       | LRNQLDIGDL                         | 31.19 | 1155.625 | 0.3  | 578.8198 | 2 | 54.4  | 11 |                               |
| PF | P85799.1       | SQAYDPYSNAAQFQLSSQSRGYQYQHRL<br>VY | 51.05 | 3523.655 | -0.1 | 881.9208 | 4 | 64.95 | 41 |                               |
| PF | P85799.1       | SQAYDPYSNAAQFQLSSQSRGYQYQHRL<br>V  | 42.31 | 3360.591 | 0.4  | 841.1554 | 4 | 59.88 | 14 |                               |
| PF | P85799.1       | LPTNLAEDTKKTEQTMRPKS               | 37.87 | 2287.184 | 0.3  | 572.8035 | 4 | 24.72 | 28 |                               |
| PF | P85799.1       | SQAYDPYSNAAQFQLSSQSRGYQYQHRL       | 37.71 | 3261.523 | -3.4 | 816.3852 | 4 | 56.14 | 10 |                               |
| PF | P85799.1       | GYPYQHRLVY                         | 37.44 | 1294.646 | 0.3  | 648.3304 | 2 | 29.02 | 28 |                               |
| PF | P85799.1       | NVPIYQEPFRF                        | 37.08 | 1261.646 | -1.1 | 631.8293 | 2 | 48.46 | 16 |                               |
| PF | P85799.1       | VPIYQEPFRF                         | 35.84 | 1147.603 | -0.1 | 574.8085 | 2 | 45.61 | 13 |                               |
| PF | P85799.1       | PIYQEPFRF                          | 25.33 | 1048.534 | 0.1  | 525.2744 | 2 | 49.81 | 6  |                               |
| PF | P85828.1       | ITGQGNRIF                          | 37.41 | 1004.54  | -0.8 | 503.277  | 2 | 21.59 | 21 |                               |
| PF | P85828.1       | SLKAPFA                            | 34.04 | 732.417  | 0.1  | 367.2158 | 2 | 24.36 | 11 |                               |

|    |          |                                      |       |          |      |          |   |       |    |           |
|----|----------|--------------------------------------|-------|----------|------|----------|---|-------|----|-----------|
| PF | P85828.1 | SLKAPF                               | 29.98 | 661.3799 | 0.1  | 331.6973 | 2 | 26.29 | 15 |           |
| PF | P85829.1 | MVPVPVHHMADELLRNGPDTVI               | 36.48 | 2439.24  | 0.7  | 814.0879 | 3 | 81.53 | 22 |           |
| PF | P85829.1 | VHHMADELLRNGPDTVI                    | 33.81 | 1915.957 | 1.1  | 639.6605 | 3 | 51.24 | 10 |           |
| PF | P85829.1 | LLRNGPDTVI                           | 31.63 | 1096.624 | 0.4  | 549.3195 | 2 | 30.43 | 6  |           |
| PF | P85829.1 | LRNGPDTVI                            | 28.06 | 983.54   | 0.1  | 492.7773 | 2 | 17.56 | 6  |           |
| PF | P85829.1 | VPVPVHHMADELL                        | 20.81 | 1455.754 | 0.4  | 486.2589 | 3 | 51.21 | 6  |           |
| PF | P85830.1 | GLDLGLSRGFSGSQAAKHLMGLAAANYA<br>GGPa | 46.77 | 2985.524 | -0.3 | 747.3881 | 4 | 90.26 | 20 | Amidation |
| PF | P85830.1 | GLDLGLSRGFSGSQAA                     | 43.99 | 1534.774 | 0.5  | 768.3947 | 2 | 57.69 | 5  |           |
| PF | P85830.1 | HLMGLAAANYAGGPa                      | 32.71 | 1340.666 | -0.7 | 671.3398 | 2 | 41.33 | 7  | Amidation |
| PF | P85830.1 | GLDLGLSRGFSGSQAAKHLMa                | 31.39 | 2043.068 | 0.5  | 682.0304 | 3 | 61.51 | 6  | Amidation |
| PF | P85830.1 | GLDLGLSRGFSGSQAAKH                   | 28.75 | 1799.928 | 0.1  | 600.9833 | 3 | 34.79 | 8  |           |
| PF | P85831.1 | IDLSRFYGHFNT                         | 45.95 | 1468.71  | -0.5 | 735.3618 | 2 | 69.86 | 42 |           |
| PF | P85831.1 | IDLSRFYGHFN                          | 42.44 | 1367.662 | -1.9 | 684.8371 | 2 | 65.48 | 27 |           |
| PF | P85831.1 | IDLSRFYGHF                           | 41.39 | 1253.619 | -0.6 | 627.8165 | 2 | 74.6  | 23 |           |
| PF | P85831.1 | FYGHFNT                              | 36.1  | 884.3817 | 0.6  | 443.1984 | 2 | 23.94 | 9  |           |
| PF | P85831.1 | DLSRFYGHFN                           | 34.65 | 1254.578 | 0.1  | 628.2964 | 2 | 65.54 | 4  |           |
| PF | P85831.1 | IDLSRFYGHFNTR                        | 32.23 | 1752.906 | -0.1 | 439.2337 | 4 | 49.93 | 10 |           |
| PF | P85832.1 | LTNYLATTGHGTNTGGPVLT                 | 52.74 | 1987.001 | 0.2  | 994.5081 | 2 | 50.02 | 12 |           |
| PF | P85832.1 | NLDEIDRVGWSGFV                       | 47.92 | 1605.779 | 0    | 803.8966 | 2 | 93.23 | 14 |           |
| PF | P85832.1 | LTNYLATTGHGTNTGGPVL                  | 45.56 | 1885.953 | 0.3  | 943.9843 | 2 | 54.77 | 5  |           |
| PF | P85832.1 | NIDEIDRTAFDNFF                       | 43.44 | 1715.779 | 1.3  | 858.8979 | 2 | 98.86 | 7  |           |
| PF | P85832.1 | LTNYLATTGHGTNTGGPVLTRRFa             | 37.72 | 2445.288 | 0.5  | 612.3295 | 4 | 44.18 | 11 | Amidation |
| PF | P85832.1 | ELVDELSPVSERETLERFa                  | 32.49 | 2146.091 | 0.9  | 716.3715 | 3 | 77.64 | 9  | Amidation |
| PF | P85832.1 | LVDELSPVSERETLERFa                   | 31.14 | 2017.048 | -0.5 | 673.3563 | 3 | 66.54 | 10 | Amidation |
| PF | Q06601.1 | AVHYSGGQPLGSKRPNDMLSQRYHFGLa         | 60.6  | 3013.509 | 0.6  | 754.3851 | 4 | 40.53 | 8  | Amidation |

|    |          |                          |       |          |      |          |   |       |    |                               |
|----|----------|--------------------------|-------|----------|------|----------|---|-------|----|-------------------------------|
| PF | Q06601.1 | PNDMLSQRYHFGLa           | 65.73 | 1575.762 | 0.1  | 788.8882 | 2 | 47.77 | 9  | Amidation                     |
| PF | Q06601.1 | AYTYVSEYKRLPVYNFGIa      | 30.64 | 2181.126 | 0.3  | 728.0494 | 3 | 72.56 | 3  | Amidation                     |
| PF | Q06601.1 | ADYPLRLNLD               | 46.77 | 1188.614 | 0    | 595.3142 | 2 | 56.69 | 6  |                               |
| PF | Q06601.1 | YPLRLNLD                 | 42.12 | 1002.55  | 0.3  | 502.2823 | 2 | 49.35 | 12 |                               |
| PF | Q06601.1 | RQYSFGLa                 | 30.29 | 868.4555 | -0.2 | 435.235  | 2 | 26.45 | 19 | Amidation                     |
| PF | Q06601.1 | GRQPYSFGLa               | 34.37 | 1022.53  | 0.3  | 512.2723 | 2 | 31.51 | 5  | Amidation                     |
| PF | Q06601.1 | GRDYSFGLa                | 28.95 | 912.4453 | 0.2  | 457.23   | 2 | 30.84 | 8  | Amidation                     |
| PF | Q06601.1 | WIDTNDNKRGRDYSFGLa       | 24.14 | 2054.992 | 0.4  | 686.0049 | 3 | 38.84 | 3  | Amidation                     |
| PF | Q06601.1 | LDYLPVDNPAFH             | 40.17 | 1399.677 | -0.4 | 700.8456 | 2 | 67.71 | 7  |                               |
| PF | Q06601.1 | AVHYSGGQPLGS             | 39.1  | 1171.562 | 0.2  | 586.7885 | 2 | 14.58 | 6  |                               |
| PF | Q06602.1 | EAEPEAEPGNRPVYIPQPRPPHRL | 23.07 | 2959.505 | 0.1  | 592.9084 | 5 | 39.74 | 5  |                               |
| PF | Q5DW47.1 | STSLEELANR               | 28.15 | 1118.557 | 0.3  | 560.2858 | 2 | 25.81 | 5  |                               |
| PF | Q5DW47.1 | STSLEELANRN              | 26.91 | 1232.6   | -0.5 | 617.3068 | 2 | 24.93 | 3  |                               |
| PF | Q5DW47.1 | pQTFTYSHGWTNa            | 22.74 | 1322.568 | 0.6  | 662.2916 | 2 | 52.52 | 6  | Pyro-glu from Q;<br>Amidation |
| PF | Q868G6.1 | ASFDDEYYKRAPMGFQGMRa     | 42.06 | 2267.025 | 0.6  | 567.7639 | 4 | 49.19 | 22 | Amidation                     |
| PF | Q868G6.1 | VLSMDGYQNILDKKDELLGEWE   | 41.48 | 2594.257 | -0.4 | 865.7594 | 3 | 98.46 | 12 |                               |
| PF | Q868G6.1 | VLSMDGYQNILD             | 40.43 | 1366.644 | -0.3 | 684.329  | 2 | 82.61 | 11 |                               |
| PF | Q868G6.1 | GVMDFQIGLQ               | 40.09 | 1106.543 | -0.7 | 554.2784 | 2 | 87.57 | 16 |                               |
| PF | Q868G6.1 | APMGFQGMRG               | 38.9  | 1050.474 | -0.5 | 526.244  | 2 | 24.95 | 13 |                               |
| PF | Q868G6.1 | APMGFQGMRa               | 38.73 | 992.4684 | -0.7 | 497.2411 | 2 | 20.02 | 38 | Amidation                     |
| PF | Q868G6.1 | APMGFYGTRG               | 38.3  | 1055.486 | -0.9 | 528.7497 | 2 | 21.9  | 13 |                               |
| PF | Q868G6.1 | ARMGFHGMRa               | 37.1  | 1060.517 | 0    | 531.2658 | 2 | 9     | 18 | Amidation                     |
| PF | Q868G6.1 | APMGFYGTRa               | 37.08 | 997.4803 | -1.1 | 499.7469 | 2 | 18.43 | 23 | Amidation                     |
| PF | Q868G6.1 | ALMGFQGVRa               | 36.88 | 976.5276 | -0.7 | 489.2708 | 2 | 31.91 | 23 | Amidation                     |
| PF | Q868G6.1 | ALMGFQGVRG               | 36.33 | 1034.533 | 0.2  | 518.2739 | 2 | 38.06 | 10 |                               |

|    |                |                           |       |          |      |          |   |        |    |                               |
|----|----------------|---------------------------|-------|----------|------|----------|---|--------|----|-------------------------------|
| PF | Q868G6.1       | SPFRYLGA                  | 35.81 | 909.4708 | -0.3 | 455.7426 | 2 | 40.27  | 14 |                               |
| PF | Q868G6.1       | GVMDFQIGLQRKKD            | 34.42 | 1633.861 | 0.6  | 545.6279 | 3 | 39.49  | 8  |                               |
| PF | Q868G6.1       | SPFRYLGARG                | 34.3  | 1122.593 | -0.5 | 375.2049 | 3 | 23.99  | 7  |                               |
| PF | Q868G6.1       | SPFRYLGARa                | 33.85 | 1064.588 | 0    | 533.3012 | 2 | 19.83  | 7  | Amidation                     |
| PF | Q868G6.1       | SLEEILDEIK                | 33.49 | 1187.629 | 0.1  | 594.8216 | 2 | 93.96  | 13 |                               |
| PF | Q868G6.1       | SPFRYLG                   | 30.94 | 838.4337 | 0.3  | 420.2242 | 2 | 36.16  | 10 |                               |
| PF | Q868G6.1       | NPRWEFRGKFVGVa            | 30.44 | 1745.959 | 0.5  | 437.4972 | 4 | 32.34  | 10 | Amidation                     |
| PF | Q868G6.1       | NPRWEFRGKFVGV             | 30.3  | 1590.842 | 0.3  | 531.2881 | 3 | 49.83  | 3  |                               |
| PF | Q868G6.1       | ASFDDEYY                  | 28.5  | 1008.371 | 0.1  | 505.1929 | 2 | 44.7   | 5  |                               |
| PF | Q868G6.1       | SLEEILDEI                 | 25.89 | 1059.534 | 0.4  | 530.7743 | 2 | 108.72 | 6  |                               |
| PF | Q868G6.1       | IILDALEELD                | 25.61 | 1142.607 | -0.2 | 572.3107 | 2 | 100.26 | 3  |                               |
| PF | XP_006557714.1 | pQQFDDYGHLRFa             | 41.67 | 1406.637 | 0.5  | 704.326  | 2 | 69.79  | 13 | Pyro-glu from Q;<br>Amidation |
| PF | XP_006559359.1 | SVSSLAKNSAWPVSL           | 46.58 | 1544.82  | -0.3 | 773.417  | 2 | 71.29  | 11 |                               |
| PF | XP_006559359.1 | NVASLARTYTLQNAa           | 44.1  | 1616.863 | -0.5 | 809.4386 | 2 | 46.96  | 8  | Amidation                     |
| PF | XP_006559359.1 | FLLLPATDNNYFHQKLPSSLRSKSL | 42.63 | 2888.555 | 0.4  | 578.7184 | 5 | 77.31  | 22 |                               |
| PF | XP_006559359.1 | NVGSVAREHGLPYa            | 41.93 | 1396.721 | -0.5 | 699.3674 | 2 | 24.98  | 21 | Amidation                     |
| PF | XP_006559359.1 | YVASLARTGDLPIRGQ          | 40.96 | 1715.932 | 0    | 572.9846 | 3 | 37.62  | 10 |                               |
| PF | XP_006559359.1 | HIGALARLGLWPLSLRTA        | 40.77 | 1831.058 | -0.1 | 611.3599 | 3 | 78.84  | 14 |                               |
| PF | XP_006559359.1 | NIASLMRDYDQSRENRPVFPa     | 39.13 | 2406.186 | 0.9  | 803.0701 | 3 | 69.67  | 13 | Amidation                     |
| PF | XP_006559359.1 | SVSSLARTGDLPVREQ          | 38.63 | 1713.901 | -0.4 | 572.3073 | 3 | 27.58  | 8  |                               |
| PF | XP_006559359.1 | NVGTLDARDFALPPa           | 38.03 | 1368.751 | -0.6 | 685.3825 | 2 | 63.59  | 18 | Amidation                     |
| PF | XP_006559359.1 | GIFLPGSVILRALSRQa         | 37.1  | 1725.041 | 0    | 576.0211 | 3 | 98.8   | 12 | Amidation                     |
| PF | XP_006559359.1 | YVASLARTGDLPIRa           | 33.92 | 1529.868 | 0    | 510.9632 | 3 | 36.19  | 7  | Amidation                     |
| PF | XP_006559359.1 | LPGSVILRALSL              | 28.72 | 1124.692 | 0.4  | 563.3533 | 2 | 76.05  | 10 |                               |
| PF | XP_006559359.1 | GIFLPGSVILR               | 27.16 | 1170.712 | 1.5  | 586.3644 | 2 | 80.54  | 14 |                               |



|    |                |                             |       |          |      |          |   |       |    |                               |
|----|----------------|-----------------------------|-------|----------|------|----------|---|-------|----|-------------------------------|
| PF | XP_006559359.1 | HIGALARLGLWPLSLRTARFS       | 25.34 | 2221.26  | 0.4  | 556.3224 | 4 | 81.47 | 4  |                               |
| PF | XP_006559865.1 | AFGLLTYPRIa                 | 34.68 | 1148.671 | -0.1 | 575.3425 | 2 | 73.38 | 13 | Amidation                     |
| PF | XP_006560385.1 | AYRKPPFNCSIFa               | 37.99 | 1394.746 | -0.3 | 698.38   | 2 | 40.92 | 20 | Amidation                     |
| PF | XP_006560385.1 | YRKPPFNCSIFa                | 26.07 | 1323.709 | 0.1  | 662.8617 | 2 | 41.73 | 5  | Amidation                     |
| PF | XP_006560385.1 | RKPPFNCSIFa                 | 24.15 | 1160.645 | 0.4  | 581.3302 | 2 | 33.49 | 11 | Amidation                     |
| PF | XP_006562922.1 | GFKPEYISTAYGFa              | 40.49 | 1477.724 | 0    | 739.8693 | 2 | 66.76 | 9  | Amidation                     |
| PF | XP_006565207.1 | SDPHLSILSKPMSAIPSYKFDD      | 45.28 | 2447.204 | -0.6 | 816.7415 | 3 | 75.81 | 11 |                               |
| PF | XP_006565207.1 | SPSLRLRFa                   | 30.48 | 973.5821 | -0.3 | 487.7982 | 2 | 28.72 | 19 | Amidation                     |
| PF | XP_006565207.1 | SDPHLSILS                   | 27.48 | 967.4974 | 0    | 484.756  | 2 | 36.83 | 8  |                               |
| PF | XP_006565207.1 | SQRSPSLRLRFa                | 24.3  | 1344.774 | 0.2  | 337.2008 | 4 | 20.45 | 5  | Amidation                     |
| PF | XP_006570344.1 | NSELINSLGLPKNMNNAa          | 46.64 | 1940.015 | 0.2  | 971.015  | 2 | 91.06 | 12 | Amidation                     |
| PF | XP_006570344.1 | LINSLGLPKNMNNAa             | 39.96 | 1609.897 | -0.2 | 805.9557 | 2 | 65.66 | 10 | Amidation                     |
| PF | XP_016769998.1 | LVDHRIPDLENEMFDSGNDPGSTVVRT | 45.09 | 3012.425 | -0.7 | 754.1129 | 4 | 66.6  | 23 |                               |
| NF | Q868G6.1       | NSIINDVKNELFPEDIN           | 71.58 | 1972.974 | -0.7 | 987.4937 | 2 | 96.19 | 11 |                               |
| NF | Q868G6.1       | VLSMDGYQNILDKKDELLGEWE      | 58.61 | 2594.257 | 5.3  | 1298.143 | 2 | 95.2  | 4  |                               |
| NF | A8CL69.1       | TSQDITSGMWFGRLa             | 41.46 | 1693.825 | 1.1  | 847.9205 | 2 | 75.51 | 4  | Amidation                     |
| NF | A8CL69.1       | pQLHNIVDKPRQNFNDPRF         | 38.15 | 2220.119 | -1.1 | 556.0364 | 4 | 40.26 | 9  | Pyro-glu from Q               |
| NF | A8CL69.1       | pQITQFTPRLa                 | 18.4  | 1084.603 | 2    | 543.3098 | 2 | 65.6  | 8  | Pyro-glu from Q;<br>Amidation |
| NF | A8CL69.1       | GMWFGPRLa                   | 36.12 | 961.4956 | 1.3  | 481.7557 | 2 | 50.46 | 11 | Amidation                     |
| NF | A8CL69.1       | MWFGPRLa                    | 26.19 | 904.4741 | 0.9  | 453.2448 | 2 | 53.31 | 9  | Amidation                     |
| NF | A8CL69.1       | pQLHNIVDKPRQN               | 50.72 | 1443.758 | 0.9  | 482.2604 | 3 | 14.04 | 8  | Pyro-glu from Q               |
| NF | A8CL69.1       | pQLHNIVDKP                  | 45.19 | 1045.556 | 0.8  | 523.7855 | 2 | 23.94 | 9  | Pyro-glu from Q               |
| NF | A8CL69.1       | RVPWTPSPRLa                 | 41.57 | 1206.699 | -0.9 | 604.356  | 2 | 23.89 | 5  | Amidation                     |
| NF | ACI90290.1     | TWKSPDIVIRFa                | 51.85 | 1359.766 | -0.7 | 454.2624 | 3 | 56.58 | 5  | Amidation                     |
| NF | ACI90290.1     | GRNDLNFIRYa                 | 36.79 | 1265.663 | 0.2  | 633.8388 | 2 | 30.39 | 9  | Amidation                     |

|    |                |                                    |       |          |      |          |   |       |    |                               |
|----|----------------|------------------------------------|-------|----------|------|----------|---|-------|----|-------------------------------|
| NF | ACI90290.1     | QITQFTPRLa                         | 33.64 | 1101.63  | -0.4 | 551.8218 | 2 | 32.4  | 10 | Amidation                     |
| NF | ACI90290.1     | AGFKNLNREQ                         | 36.45 | 1175.605 | -0.1 | 588.8096 | 2 | 10.17 | 12 |                               |
| NF | ACI90290.1     | SPDIVIRFa                          | 33.7  | 944.5443 | -0.9 | 473.279  | 2 | 45.58 | 8  | Amidation                     |
| NF | NP_001161192.1 | PEIFTSPEELRRYIDHVS DY YLLSGKARYa   | 46.23 | 3515.784 | 0.6  | 586.9714 | 6 | 94.48 | 7  | Amidation                     |
| NF | P85527.1       | pQDVDHVFLRFa                       | 52.69 | 1256.63  | 0    | 629.3223 | 2 | 72.23 | 6  | Pyro-glu from Q;<br>Amidation |
| NF | P85527.1       | QDVDHVFLRFa                        | 48.09 | 1273.657 | 0.3  | 425.5596 | 3 | 48.21 | 5  | Amidation                     |
| NF | P85527.1       | pQDVDHVFLRF                        | 49.46 | 1257.614 | 0.2  | 629.8145 | 2 | 74.75 | 6  | Pyro-glu from Q               |
| NF | P85527.1       | pQDVDHVFLR                         | 43.61 | 1110.546 | 2.4  | 556.2815 | 2 | 30.9  | 8  | Pyro-glu from Q               |
| NF | P85527.1       | pQDVDHVFL                          | 24.41 | 954.4447 | 0.5  | 478.2299 | 2 | 70.18 | 6  | Pyro-glu from Q               |
| NF | P85798.1       | LRNQLDIGDLQ                        | 49.85 | 1283.683 | 0    | 642.8489 | 2 | 41.44 | 6  |                               |
| NF | P85798.1       | LRNQLDIGDL                         | 46.57 | 1155.625 | 0.7  | 578.8201 | 2 | 35.03 | 3  |                               |
| NF | P85798.1       | IPAADKERLLN                        | 48.73 | 1238.698 | 0.9  | 620.3569 | 2 | 15.09 | 7  |                               |
| NF | P85799.1       | SQAYDPYSNAAQFQLSSQSRGYPYQHRL<br>VY | 76.59 | 3523.655 | -0.9 | 881.9201 | 4 | 60.11 | 31 |                               |
| NF | P85799.1       | SQAYDPYSNAAQFQLSSQSRGYPYQHRL       | 66.47 | 3261.523 | -1.1 | 816.3871 | 4 | 51.7  | 6  |                               |
| NF | P85799.1       | SQAYDPYSNAAQFQLSSQSRGYPYQHRL<br>V  | 62.02 | 3360.591 | -2   | 841.1534 | 4 | 55.98 | 5  |                               |
| NF | P85799.1       | LPTNLAEDTKKTEQTMRPKS               | 60.38 | 2287.184 | -0.6 | 572.803  | 4 | 20.72 | 19 |                               |
| NF | P85799.1       | NVPIYQEPRF                         | 46.81 | 1261.646 | -0.8 | 631.8295 | 2 | 45.2  | 8  |                               |
| NF | P85799.1       | VPIYQEPRF                          | 45.86 | 1147.603 | -0.2 | 574.8084 | 2 | 42.06 | 7  |                               |
| NF | P85799.1       | GYPYQHRLVY                         | 39.06 | 1294.646 | -0.3 | 648.33   | 2 | 23.28 | 7  |                               |
| NF | P85799.1       | PIYQEPRF                           | 25.88 | 1048.534 | 0.2  | 525.2745 | 2 | 45.14 | 3  |                               |
| NF | P85828.1       | ITGQGNRIF                          | 48.34 | 1004.54  | 0.4  | 503.2776 | 2 | 19.51 | 3  |                               |
| NF | P85828.1       | SLKAPFA                            | 40.92 | 732.417  | 0.1  | 367.2158 | 2 | 29.4  | 5  |                               |
| NF | P85828.1       | SLKAPF                             | 35.22 | 661.3799 | -0.1 | 331.6972 | 2 | 23.98 | 5  |                               |
| NF | P85829.1       | MVPVPVHHMADELLRNGPDTVI             | 49.4  | 2439.24  | 0.1  | 814.0874 | 3 | 74.93 | 6  |                               |

|    |          |                                      |       |          |      |          |   |       |    |           |
|----|----------|--------------------------------------|-------|----------|------|----------|---|-------|----|-----------|
| NF | P85829.1 | VHHMADELLRNGPDTVI                    | 42.7  | 1915.957 | -0.5 | 639.6594 | 3 | 44.62 | 5  |           |
| NF | P85829.1 | VPVPVHHMADELL                        | 49.99 | 1455.754 | 0.2  | 728.8846 | 2 | 33.13 | 7  |           |
| NF | P85829.1 | LLRNGPDTVI                           | 35.24 | 1096.624 | -0.1 | 549.3192 | 2 | 28.76 | 11 |           |
| NF | P85829.1 | LRNGPDTVI                            | 28.81 | 983.54   | 0.5  | 492.7775 | 2 | 16.64 | 12 |           |
| NF | P85830.1 | GLDLGLSRGFSGSQAAKHLMGLAAANYA<br>GGPa | 75.12 | 2985.524 | 0.3  | 996.1823 | 3 | 83.37 | 8  | Amidation |
| NF | P85830.1 | GLDLGLSRGFSGSQAAKH                   | 47.59 | 1799.928 | -0.2 | 600.9831 | 3 | 30.26 | 7  |           |
| NF | P85830.1 | GLDLGLSRGFSGSQAAKHLMa                | 34.44 | 2043.068 | 1.2  | 682.0309 | 3 | 54.93 | 8  | Amidation |
| NF | P85830.1 | GLDLGLSRGFSGSQAA                     | 70.04 | 1534.774 | 0.5  | 768.3947 | 2 | 43.37 | 5  |           |
| NF | P85830.1 | HLMGLAAANYAGGPa                      | 47.07 | 1340.666 | -0.8 | 671.3397 | 2 | 35.45 | 8  | Amidation |
| NF | P85831.1 | IDLSRFYGHFNT                         | 66.33 | 1468.71  | -0.8 | 735.3616 | 2 | 62.1  | 15 |           |
| NF | P85831.1 | IDLSRFYGHFN                          | 59.58 | 1367.662 | 0    | 684.8384 | 2 | 59.48 | 12 |           |
| NF | P85831.1 | IDLSRFYGHF                           | 54.45 | 1253.619 | 0.1  | 627.817  | 2 | 66.68 | 7  |           |
| NF | P85831.1 | IDLSRFYGHFNTKR                       | 45.5  | 1752.906 | 0.5  | 585.3095 | 3 | 39.93 | 6  |           |
| NF | P85831.1 | DLSRFYGHFN                           | 33.5  | 1254.578 | -0.6 | 628.8198 | 2 | 65.09 | 14 |           |
| NF | P85831.1 | FYGHFNT                              | 44.01 | 884.3817 | -0.2 | 443.1981 | 2 | 20.92 | 13 |           |
| NF | P85832.1 | LTNYLATTGHGTNTGGPVLT                 | 85.24 | 1987.001 | -0.6 | 994.5072 | 2 | 47.09 | 8  |           |
| NF | P85832.1 | NLDEIDRVGWSGFV                       | 56.68 | 1605.779 | -0.9 | 803.8959 | 2 | 86.63 | 4  |           |
| NF | P85832.1 | NIDEIDRTAFDNFF                       | 54.74 | 1715.779 | -0.7 | 858.8962 | 2 | 94.63 | 7  |           |
| NF | P85832.1 | LTNYLATTGHGTNTGGPVLTRRFa             | 52.84 | 2445.288 | 0    | 612.3292 | 4 | 38.23 | 12 | Amidation |
| NF | P85832.1 | ELVDELSPVSERETLERFa                  | 29.85 | 2146.091 | -1.2 | 716.3699 | 3 | 72.71 | 4  | Amidation |
| NF | P85832.1 | LVDELSPVSERETLERFa                   | 26.21 | 2017.048 | -1.1 | 673.3558 | 3 | 61.74 | 3  | Amidation |
| NF | P85832.1 | LTNYLATTGHGTNTGGPVL                  | 83.65 | 1885.953 | 3.4  | 943.9872 | 2 | 37.57 | 3  |           |
| NF | Q06601.1 | PNDMLSQRYHFGLa                       | 69.72 | 1575.762 | -0.4 | 526.2609 | 3 | 47.76 | 6  | Amidation |
| NF | Q06601.1 | AVHYSGGQPLGSKRPNDMLSQRYHFGLa         | 66.38 | 3013.509 | 0.1  | 754.3846 | 3 | 41.05 | 10 | Amidation |
| NF | Q06601.1 | AYTYVSEYKRLPVYNFGIa                  | 69.78 | 2181.126 | -1.2 | 1091.569 | 2 | 73.7  | 8  | Amidation |

|    |          |                         |       |          |      |          |   |       |    |                               |
|----|----------|-------------------------|-------|----------|------|----------|---|-------|----|-------------------------------|
| NF | Q06601.1 | ADYPLRLNLD              | 50.74 | 1188.614 | 0.6  | 595.3146 | 2 | 57.13 | 15 |                               |
| NF | Q06601.1 | YPLRLNLD                | 44.94 | 1002.55  | 0.3  | 502.2823 | 2 | 49.7  | 21 |                               |
| NF | Q06601.1 | LDYLPVDNPAFH            | 54.33 | 1399.677 | 1.6  | 700.8469 | 2 | 61.58 | 5  |                               |
| NF | Q06601.1 | RQYSFGLa                | 34.76 | 868.4555 | 0.1  | 435.2351 | 2 | 23.68 | 7  | Amidation                     |
| NF | Q06601.1 | GRQPYSFGLa              | 38.89 | 1022.53  | 0.2  | 512.2722 | 2 | 29.28 | 7  | Amidation                     |
| NF | Q06601.1 | GRDYSFGLa               | 30.15 | 912.4453 | 0    | 457.2299 | 2 | 29.2  | 10 | Amidation                     |
| NF | Q06601.1 | WIDTNDNKRGRDYSFGLa      | 36.47 | 2054.992 | 1    | 686.0054 | 3 | 34.51 | 7  | Amidation                     |
| NF | Q06601.1 | AVHYSGGQPLGS            | 39.03 | 1171.562 | 0.3  | 586.7885 | 2 | 13.57 | 11 |                               |
| NF | Q06602.1 | EAEPEAEPGNRPVYIPQRPHPRL | 66.9  | 2959.505 | 3.2  | 592.9102 | 5 | 21.55 | 23 |                               |
| NF | Q5DW47.1 | STSLEELANR              | 36.25 | 1118.557 | 0.9  | 560.2861 | 2 | 24.18 | 7  |                               |
| NF | Q5DW47.1 | STSLEELANRN             | 39.72 | 1232.6   | 0.7  | 617.3075 | 2 | 23.07 | 9  |                               |
| NF | Q5DW47.1 | pQTFTYSHGWTNa           | 51.7  | 1322.568 | -0.6 | 662.2909 | 2 | 50.66 | 19 | Pyro-glu from Q;<br>Amidation |
| NF | Q868G6.1 | ASFDDEYYKRAPMGFQGMRa    | 58.13 | 2267.025 | -0.1 | 567.7635 | 4 | 43.53 | 9  | Amidation                     |
| NF | Q868G6.1 | ARMGFHGMRa              | 54.74 | 1060.517 | -0.5 | 531.2656 | 2 | 8.87  | 7  | Amidation                     |
| NF | Q868G6.1 | APMGFQGMRa              | 49.97 | 992.4684 | 0    | 497.2415 | 2 | 19.16 | 6  | Amidation                     |
| NF | Q868G6.1 | SLEEILDEIK              | 47.34 | 1187.629 | 0.3  | 594.8217 | 2 | 84.58 | 9  |                               |
| NF | Q868G6.1 | NPRWEFRGKFVGV           | 45.98 | 1590.842 | 0.3  | 531.2881 | 3 | 40.1  | 9  |                               |
| NF | Q868G6.1 | SPFRYLGARa              | 42.47 | 1064.588 | 0.1  | 533.3013 | 2 | 15.98 | 4  | Amidation                     |
| NF | Q868G6.1 | ALMGFQGVRa              | 42.22 | 976.5276 | -0.3 | 489.2709 | 2 | 29.18 | 6  | Amidation                     |
| NF | Q868G6.1 | NPRWEFRGKFVGVRa         | 40.99 | 1745.959 | -0.2 | 437.4969 | 4 | 21.41 | 7  | Amidation                     |
| NF | Q868G6.1 | SPFRYLGA                | 40.83 | 909.4708 | 0    | 455.7427 | 2 | 35.07 | 7  |                               |
| NF | Q868G6.1 | GVMDFQIGLQRKKD          | 40.37 | 1633.861 | 0.1  | 545.6276 | 3 | 34.17 | 7  |                               |
| NF | Q868G6.1 | SPFRYLGARG              | 39.19 | 1122.593 | -0.4 | 375.2049 | 3 | 19.38 | 4  |                               |
| NF | Q868G6.1 | ALMGFQGVRG              | 38.17 | 1034.533 | -0.1 | 518.2737 | 2 | 34.43 | 13 |                               |
| NF | Q868G6.1 | GVMDFQIGLQ              | 37.68 | 1106.543 | 0.3  | 554.2789 | 2 | 84.25 | 6  |                               |

|    |                |                                          |       |          |      |          |   |        |    |                               |
|----|----------------|------------------------------------------|-------|----------|------|----------|---|--------|----|-------------------------------|
| NF | Q868G6.1       | VLSMDGYQNILD                             | 36.56 | 1366.644 | 0.1  | 684.3292 | 2 | 79.28  | 3  |                               |
| NF | Q868G6.1       | APMGFYGTRa                               | 36.12 | 997.4803 | 1.1  | 499.748  | 2 | 16.97  | 3  | Amidation                     |
| NF | Q868G6.1       | ASFDDEYY                                 | 30.67 | 1008.371 | 0.1  | 505.1929 | 2 | 40.98  | 4  |                               |
| NF | Q868G6.1       | SLEEILDEI                                | 23.62 | 1059.534 | -1.5 | 530.7733 | 2 | 104.74 | 3  |                               |
| NF | Q868G6.1       | IILDALEELD                               | 28    | 1142.607 | 0.6  | 572.3112 | 2 | 102.74 | 5  |                               |
| NF | Q868G6.1       | APMGFQGMRG                               | 50.06 | 1050.474 | -0.3 | 526.2441 | 2 | 23.14  | 5  |                               |
| NF | Q868G6.1       | APMGFYGTRG                               | 43.78 | 1055.486 | -0.3 | 528.7501 | 2 | 20.72  | 3  |                               |
| NF | XP_006557714.1 | pQQFDDYGHLRFa                            | 59.46 | 1406.637 | 0.4  | 704.3259 | 2 | 41.18  | 4  | Pyro-glu from Q;<br>Amidation |
| NF | XP_006559359.1 | SVSSLAKNSAWPVSL                          | 70.04 | 1544.82  | 0    | 773.4172 | 2 | 66.98  | 6  |                               |
| NF | XP_006559359.1 | NVASLARTYTLPQNAa                         | 66.96 | 1616.863 | -0.3 | 809.4387 | 2 | 42.45  | 6  | Amidation                     |
| NF | XP_006559359.1 | NVGSVAREHGLPYa                           | 62.66 | 1396.721 | -0.5 | 699.3675 | 2 | 20.47  | 11 | Amidation                     |
| NF | XP_006559359.1 | YVASLARTGDLPIRGQ                         | 57.46 | 1715.932 | 0.2  | 572.9846 | 3 | 35.02  | 9  |                               |
| NF | XP_006559359.1 | FLLLPATDNNYFHQKLPSSLRSKSL                | 51.46 | 2888.555 | 1.1  | 578.7189 | 5 | 69.14  | 13 |                               |
| NF | XP_006559359.1 | SVSSLARTGDLPVREQ                         | 47.87 | 1713.901 | 0    | 572.3076 | 3 | 24.99  | 6  |                               |
| NF | XP_006559359.1 | NIASLMRDYDQSRENRVFPa                     | 45.43 | 2406.186 | -0.5 | 803.069  | 3 | 60.51  | 5  | Amidation                     |
| NF | XP_006559359.1 | YVASLARTGDLPIRa                          | 35.3  | 1529.868 | 0.8  | 510.9636 | 3 | 31.89  | 4  | Amidation                     |
| NF | XP_006559359.1 | LPGSVILRALS                              | 34.9  | 1124.692 | 0.5  | 563.3534 | 2 | 70.13  | 8  |                               |
| NF | XP_006559359.1 | NVGTLARDFALPPa                           | 33.49 | 1368.751 | 0.1  | 685.383  | 2 | 59.01  | 11 | Amidation                     |
| NF | XP_006559359.1 | GIFLPGSVILR                              | 32.7  | 1170.712 | 0.2  | 586.3636 | 2 | 76.91  | 5  |                               |
| NF | XP_006559359.1 | GIFLPGSVILRALSQRa                        | 31.65 | 1725.041 | -1   | 576.0204 | 3 | 94.65  | 8  | Amidation                     |
| NF | XP_006559359.1 | HIGALARLGLWPSLRARFS                      | 29.69 | 2221.26  | -0.6 | 556.3218 | 4 | 68.04  | 3  |                               |
| NF | XP_006559359.1 | HIGALARLGLWPSLRTA                        | 24.36 | 1831.058 | 0.4  | 611.3602 | 3 | 67.47  | 5  |                               |
| NF | XP_006559359.1 | NVGTLARDFALPPGRRNIASLMRDYDQSR<br>ENRVFPa | 19.42 | 4127.135 | 0.3  | 688.8633 | 6 | 72.55  | 6  | Amidation                     |
| NF | XP_006559865.1 | AFGLLTYPRIa                              | 34    | 1148.671 | -0.2 | 575.3424 | 2 | 68.55  | 5  | Amidation                     |

|    |                |                                                             |       |          |      |          |   |       |    |           |
|----|----------------|-------------------------------------------------------------|-------|----------|------|----------|---|-------|----|-----------|
| NF | XP_006559865.1 | EKLKPNMRRAFGLLTYPR <sub>Ia</sub>                            | 21.02 | 2301.325 | 0.5  | 576.3389 | 4 | 45.4  | 4  | Amidation |
| NF | XP_006560385.1 | AYRKPPFNGSIF <sub>a</sub>                                   | 41.64 | 1394.746 | -0.1 | 698.3801 | 2 | 35.3  | 6  | Amidation |
| NF | XP_006560385.1 | KPPFNGSIF <sub>a</sub>                                      | 36.34 | 1004.544 | 0    | 503.2794 | 2 | 42.18 | 7  | Amidation |
| NF | XP_006560385.1 | YRKPPFNGSIF <sub>a</sub>                                    | 47.47 | 1323.709 | 0.3  | 662.8619 | 2 | 32.59 | 7  | Amidation |
| NF | XP_006560385.1 | RKPPFNGSIF <sub>a</sub>                                     | 40.45 | 1160.645 | -0.2 | 581.3298 | 2 | 24.42 | 9  | Amidation |
| NF | XP_006562922.1 | GFKPEYISTAYGF <sub>a</sub>                                  | 52.25 | 1477.724 | 0.6  | 739.8698 | 2 | 70.58 | 29 | Amidation |
| NF | XP_006565207.1 | SDPHLSILSKPMSAIPSYKFDD                                      | 72.01 | 2447.204 | -0.3 | 816.7418 | 3 | 70.27 | 6  |           |
| NF | XP_006565207.1 | SQRSPSLRLRF <sub>a</sub>                                    | 32.44 | 1344.774 | -0.2 | 449.2651 | 3 | 15.82 | 6  | Amidation |
| NF | XP_006565207.1 | SPSLRLRF <sub>a</sub>                                       | 28.98 | 973.5821 | 0.5  | 487.7986 | 2 | 22.89 | 5  | Amidation |
| NF | XP_006565207.1 | SDPHLSILS                                                   | 38.23 | 967.4974 | 0    | 484.756  | 2 | 33.67 | 7  |           |
| NF | XP_006570344.1 | NSELINSLGLPKNMNNA <sub>a</sub>                              | 64.9  | 1940.015 | 3.8  | 971.0184 | 2 | 85.93 | 7  | Amidation |
| NF | XP_006570344.1 | LINSLGLPKNMNNA <sub>a</sub>                                 | 54.36 | 1609.897 | -0.3 | 805.9557 | 2 | 61.69 | 6  | Amidation |
| NF | XP_016769998.1 | LVDHRIPDLENEMFDSGNDPGSTVVRT                                 | 65.72 | 3012.425 | -0.4 | 1005.148 | 3 | 63.14 | 13 |           |
| NF | XP_016769998.1 | IGSLSIVNSMDVLRQRVLELARRKALQD<br>QAQIDANRRLLET <sub>Ia</sub> | 34.17 | 4913.782 | -0.5 | 819.9706 | 6 | 96.85 | 12 | Amidation |
| NF | XP_016769998.1 | HPISYNTYDERELSRDHPPLLL                                      | 33.16 | 2664.33  | 0.3  | 667.0898 | 4 | 52.44 | 6  |           |

**Table S4. Neuropeptides identified in the brain of *Apis cerana cerana* workers.** "NB" is nurse bee. "PF" is pollen forager. "NF" is nectar forager. "Protein Accession" is the unique number given to mark the entry of a protein in the database NCBIInr. "Peptide" is the amino acid sequence of the peptide as determined in PEAKS Search. "-10lgP" is the score indicates the scoring significance of a peptide-spectrum match. "Mass" is monoisotopic mass of the peptide. "ppm" is precursor mass error, calculated as  $10^6 \times (\text{precursor mass} - \text{peptide mass}) / \text{peptide mass}$ . "m/z" is precursor mass-to-charge ratio. "z" is peptide charge. "RT" is retention time (elution time) of the spectrums as recorded in the data. "#Spec" is the number of scanned spectrums of the peptide. "PTM" is post translational modification types present in the peptide.

| Sample | Protein Accession | Peptide                                         | -10lgP | Mass     | ppm  | m/z      | z | RT    | #Spec | PTM                           |
|--------|-------------------|-------------------------------------------------|--------|----------|------|----------|---|-------|-------|-------------------------------|
| NB     | PBC25365.1        | pQQFDDYGHLRFa                                   | 26.97  | 1406.637 | -2   | 704.3242 | 2 | 56.29 | 6     | Pyro-glu from Q;<br>Amidation |
| NB     | PBC27532.1        | LVDHRIPDLENEMF                                  | 48.92  | 1726.835 | 1.8  | 864.4263 | 2 | 49.73 | 8     |                               |
| NB     | PBC27532.1        | ISYDTYDERELSRDHPPLLL                            | 47.44  | 2431.202 | 2    | 811.4095 | 3 | 51.01 | 9     |                               |
| NB     | PBC27532.1        | HPISYDTYDERELSRDHPPLLL                          | 45.5   | 2665.314 | 0.7  | 889.4457 | 3 | 41.65 | 14    |                               |
| NB     | PBC27532.1        | SLPLYGGNMSKGTGDSRLKSE                           | 45.37  | 2139.063 | 1    | 535.7736 | 4 | 19.63 | 8     |                               |
| NB     | PBC27532.1        | SLPLYGGNMSKGTGDSRLKSEFE                         | 43.99  | 2415.174 | 1.1  | 806.0662 | 3 | 30.88 | 7     |                               |
| NB     | PBC27532.1        | IGSLSIVNSMDVLRQRVLELARRKALQD<br>QAQIDANRRLLETIa | 41.71  | 4913.782 | 0.6  | 983.7643 | 5 | 87.07 | 14    | Amidation                     |
| NB     | PBC27532.1        | ARRKALQDQAQIDANRRLLETIa                         | 37.21  | 2577.458 | 0.4  | 516.499  | 5 | 22.74 | 4     | Amidation                     |
| NB     | PBC27532.1        | LVDHRIPDLENEMFDSGNDPGSTVVRT                     | 58.45  | 3012.425 | 0.6  | 1005.149 | 3 | 50.38 | 18    |                               |
| NB     | PBC27982.1        | ITGQGNRIF                                       | 39.25  | 1004.54  | 0.5  | 503.2777 | 2 | 18.96 | 8     |                               |
| NB     | PBC27982.1        | SLKAPFA                                         | 34.7   | 732.417  | -0.5 | 367.2156 | 2 | 20.05 | 5     |                               |
| NB     | PBC27985.1        | YLLSGKARYa                                      | 31.25  | 1068.608 | 0.7  | 535.3116 | 2 | 11.7  | 5     | Amidation                     |
| NB     | PBC28057.1        | GNNRPVYIPQRP PHP                                | 45.28  | 1837.97  | 0.8  | 613.6644 | 3 | 17.05 | 10    |                               |
| NB     | PBC28057.1        | GNNRPVYIPQRP PHPRL                              | 38.71  | 2107.155 | 1.9  | 703.3936 | 3 | 19.33 | 10    |                               |
| NB     | PBC28057.1        | PVYIPQRP PHP                                    | 36.58  | 1396.762 | 0    | 466.5944 | 3 | 22.15 | 3     |                               |
| NB     | PBC28214.1        | GLDLGLSRGFSGSQA AKHLMGLAAANYA<br>GGPa           | 55.91  | 2985.524 | 2.3  | 996.1843 | 3 | 69.28 | 15    | Amidation                     |

|    |            |                           |       |          |      |          |   |       |    |                               |
|----|------------|---------------------------|-------|----------|------|----------|---|-------|----|-------------------------------|
| NB | PBC28214.1 | GLDLGLSRGFSGSQAAKH        | 43.4  | 1799.928 | 0.6  | 900.9717 | 2 | 23.14 | 9  |                               |
| NB | PBC28214.1 | GLDLGLSRGFSGSQAA          | 51.79 | 1534.774 | 1.7  | 768.3955 | 2 | 42.16 | 6  |                               |
| NB | PBC28214.1 | GLDLGLSRGFSGSQAAKHLMa     | 37.61 | 2043.068 | 0.8  | 682.0306 | 3 | 41.21 | 3  | Amidation                     |
| NB | PBC30406.1 | SDPHLSIGILSKPISAI PSSKFDD | 54.85 | 2523.322 | 1.1  | 842.1155 | 3 | 58.84 | 15 |                               |
| NB | PBC30406.1 | SPSLRLRFa                 | 33.83 | 973.5821 | 0.1  | 487.7984 | 2 | 18.81 | 4  | Amidation                     |
| NB | PBC30406.1 | SDPHLSIGILSKPISAI P       | 32.67 | 1844.041 | 1.8  | 615.6886 | 3 | 64.64 | 5  |                               |
| NB | PBC30406.1 | SQRSPSLRLRFa              | 30.49 | 1344.774 | -0.2 | 449.2651 | 3 | 14.25 | 3  | Amidation                     |
| NB | PBC30406.1 | SDPHLSIGILSKP             | 47.29 | 1362.751 | 1.1  | 682.3834 | 2 | 31.95 | 8  |                               |
| NB | PBC31004.1 | pQMFTYSHGWTNa             | 36.09 | 1352.561 | 1.4  | 677.2886 | 2 | 54.66 | 3  | Pyro-glu from Q;<br>Amidation |
| NB | PBC31004.1 | STSLEELVNR                | 32.15 | 1146.588 | 0.5  | 574.3016 | 2 | 27.94 | 3  |                               |
| NB | PBC31251.1 | YRKPPFNGSIFa              | 37.89 | 1323.709 | 0.8  | 662.8622 | 2 | 24.67 | 4  | Amidation                     |
| NB | PBC31251.1 | AYRKPPFNGSIFa             | 36.33 | 1394.746 | 1.3  | 698.3811 | 2 | 25.09 | 13 | Amidation                     |
| NB | PBC31251.1 | KPPFNGSIFa                | 27.98 | 1004.544 | 0.7  | 503.2798 | 2 | 30.98 | 5  | Amidation                     |
| NB | PBC31251.1 | RKPPFNGSIFa               | 20.29 | 1160.645 | 1    | 581.3306 | 2 | 21.64 | 12 | Amidation                     |
| NB | PBC31431.1 | APVGYQEMQGKNSASL NSENGIF  | 54.25 | 2715.296 | 2.7  | 906.1084 | 3 | 48.51 | 8  |                               |
| NB | PBC31431.1 | NSIINDVKNELFPEDIN         | 51.1  | 1972.974 | 0.9  | 987.4952 | 2 | 83.93 | 25 |                               |
| NB | PBC31431.1 | STDFQDVESGSESKRARMGFHGMRa | 45.17 | 2860.313 | 0.4  | 573.0701 | 5 | 25.77 | 7  | Amidation                     |
| NB | PBC31431.1 | ARMGFHGMRa                | 43.34 | 1060.517 | 1    | 531.2664 | 2 | 7.55  | 19 | Amidation                     |
| NB | PBC31431.1 | APMGFQGMRG                | 41.6  | 1050.474 | 1    | 526.2448 | 2 | 19.99 | 4  |                               |
| NB | PBC31431.1 | SPFRYLG V                 | 41.02 | 937.5021 | 0.2  | 469.7584 | 2 | 36.47 | 9  |                               |
| NB | PBC31431.1 | APMGFYGTRG                | 40.33 | 1055.486 | 0.8  | 528.7506 | 2 | 18.81 | 3  |                               |
| NB | PBC31431.1 | APMGFQGMRa                | 40.14 | 992.4684 | 0.5  | 497.2418 | 2 | 17.14 | 9  | Amidation                     |
| NB | PBC31431.1 | ALMGFQGV RG               | 38.56 | 1034.533 | 1.2  | 518.2744 | 2 | 26.54 | 4  |                               |
| NB | PBC31431.1 | ALMGFQGV Ra               | 38.13 | 976.5276 | 0.8  | 489.2715 | 2 | 23.4  | 5  | Amidation                     |
| NB | PBC31431.1 | APMGFYGTRa                | 37.78 | 997.4803 | 0.3  | 499.7476 | 2 | 15.26 | 6  | Amidation                     |



|    |            |                      |       |          |      |          |   |       |    |                               |
|----|------------|----------------------|-------|----------|------|----------|---|-------|----|-------------------------------|
| NB | PBC31431.1 | ARMGFHGMRG           | 36.45 | 1118.523 | -0.5 | 373.848  | 3 | 9.58  | 3  |                               |
| NB | PBC31431.1 | SPFRYLGVRa           | 35.49 | 1092.619 | 0.3  | 547.3171 | 2 | 17.93 | 10 | Amidation                     |
| NB | PBC31431.1 | ASFDDEYY             | 22.86 | 1008.371 | 0.6  | 505.1932 | 2 | 33.37 | 7  |                               |
| NB | PBC31431.1 | ASFDDEYYKRAPMGFQGMRa | 50.81 | 2267.025 | 1.1  | 567.7642 | 4 | 31.82 | 6  | Amidation                     |
| NB | PBC31431.1 | STDFQDVESGSESF       | 45.52 | 1533.611 | 0.9  | 767.8133 | 2 | 45.31 | 8  |                               |
| NB | PBC32274.1 | pQLHNIIDKPRQN        | 42.12 | 1457.774 | 1.2  | 729.8951 | 2 | 16.05 | 6  | Pyro-glu from Q               |
| NB | PBC32274.1 | RVPWTPSPRLa          | 36.39 | 1206.699 | 1.2  | 604.3572 | 2 | 19.93 | 5  | Amidation                     |
| NB | PBC32274.1 | pQLHNIIDKPRQNFNDPRF  | 36.19 | 2234.135 | 0.3  | 559.5411 | 4 | 32.1  | 7  | Pyro-glu from Q               |
| NB | PBC32274.1 | pQITQFTPRLa          | 33.03 | 1084.603 | 0.4  | 543.309  | 2 | 53.9  | 4  | Pyro-glu from Q;<br>Amidation |
| NB | PBC32274.1 | VPWTPSPRLa           | 32.1  | 1050.597 | 0.2  | 526.3061 | 2 | 25.14 | 3  | Amidation                     |
| NB | PBC32274.1 | pQLHNIIDKPRQNFNDP    | 28.81 | 1930.965 | 1.6  | 966.4913 | 2 | 26.9  | 4  | Pyro-glu from Q               |
| NB | PBC32274.1 | SGMWFGPRLa           | 27.1  | 1048.528 | 1.5  | 525.2719 | 2 | 49.17 | 3  | Amidation                     |
| NB | PBC32274.1 | TSQDITSGMWFGPRLa     | 42.69 | 1693.825 | 1.1  | 847.9205 | 2 | 63.45 | 10 | Amidation                     |
| NB | PBC32274.1 | DITSGMWFGPRLa        | 33.24 | 1377.686 | 1.6  | 689.8515 | 2 | 77.83 | 3  | Amidation                     |
| NB | PBC32274.1 | pQLHNIIDKP           | 32.19 | 1059.571 | -0.1 | 530.7928 | 2 | 24.84 | 5  | Pyro-glu from Q               |
| NB | PBC32274.1 | SQDITSGMWFGPRLa      | 31.19 | 1592.777 | 2.4  | 797.3976 | 2 | 67.49 | 3  | Amidation                     |
| NB | PBC32274.1 | GMWFGPRLa            | 31.02 | 961.4956 | 0.7  | 481.7554 | 2 | 50.43 | 5  | Amidation                     |
| NB | PBC32496.1 | IPAADKERLLN          | 41.66 | 1238.698 | 0.7  | 620.3568 | 2 | 14.79 | 5  |                               |
| NB | PBC32496.1 | LRNQLDIGDLQ          | 40.78 | 1283.683 | 2.1  | 642.8503 | 2 | 31.12 | 6  |                               |
| NB | PBC32496.1 | SYWKQCAFNAVSCFa      | 39.16 | 1651.728 | 1.1  | 826.8719 | 2 | 69.48 | 5  | Amidation                     |
| NB | PBC32545.1 | NSELINSLGLPKNMNNAa   | 46.62 | 1940.015 | 1.7  | 971.0164 | 2 | 72.76 | 8  | Amidation                     |
| NB | PBC32608.1 | IDLSRFYGHFNTKR       | 47.18 | 1752.906 | 1.2  | 585.3099 | 3 | 28.6  | 11 |                               |
| NB | PBC32608.1 | IDLSRFYGHFNT         | 45.98 | 1468.71  | 1.8  | 735.3635 | 2 | 49.16 | 9  |                               |
| NB | PBC32608.1 | IDLSRFYGHF           | 43.61 | 1253.619 | 0.9  | 627.8174 | 2 | 53.8  | 6  |                               |
| NB | PBC32608.1 | DLSRFYGHF            | 26.84 | 1140.535 | 0.4  | 571.2751 | 2 | 36.46 | 7  |                               |

|    |            |                                    |       |          |      |          |   |       |    |                               |
|----|------------|------------------------------------|-------|----------|------|----------|---|-------|----|-------------------------------|
| NB | PBC32608.1 | IDLSRFYGHFNTK                      | 29.22 | 1596.805 | -0.1 | 533.2755 | 3 | 35.94 | 3  |                               |
| NB | PBC32678.1 | pQDVDHVFLRFa                       | 40.98 | 1256.63  | 0.8  | 629.3228 | 2 | 61.33 | 6  | Pyro-glu from Q;<br>Amidation |
| NB | PBC32678.1 | QDVDHVFLRFa                        | 40.61 | 1273.657 | 0.9  | 637.8362 | 2 | 36.74 | 8  | Amidation                     |
| NB | PBC32678.1 | pQDVDHVFLR                         | 39.04 | 1110.546 | 1.2  | 556.2808 | 2 | 33.73 | 4  | Pyro-glu from Q               |
| NB | PBC32727.1 | LPTNLGEDTKKTEQTMRPKS               | 49.08 | 2273.169 | 0.9  | 569.2999 | 4 | 15.3  | 14 |                               |
| NB | PBC32727.1 | SQAYDPYSNAAQFQLSSQSRGYPYQHRL       | 48.8  | 3261.523 | 0.5  | 816.3884 | 4 | 39.12 | 7  |                               |
| NB | PBC32727.1 | NVPIYQEPFR                         | 35.7  | 1261.646 | 0.1  | 631.8301 | 2 | 32.71 | 5  |                               |
| NB | PBC32727.1 | YPYQHRLIY                          | 34.97 | 1251.64  | 1.2  | 626.8281 | 2 | 21.18 | 4  |                               |
| NB | PBC32727.1 | SQAYDPYSNAAQFQLSSQSRGYPYQHRLI<br>Y | 55.22 | 3537.67  | 1.8  | 885.4265 | 4 | 51.39 | 26 |                               |
| NB | PBC32727.1 | SQAYDPYSNAAQFQLSSQSRGYPYQHRLI      | 51.38 | 3374.607 | 1.7  | 844.6604 | 4 | 46.46 | 5  |                               |
| NB | PBC32727.1 | VPIYQEPFR                          | 36.9  | 1147.603 | 0.8  | 574.809  | 2 | 30.77 | 3  |                               |
| NB | PBC32727.1 | GYPYQHRLIY                         | 27.89 | 1308.662 | 1.5  | 655.339  | 2 | 22.03 | 5  |                               |
| NB | PBC32914.1 | SIATLAKNDDLPISLHDRMAENEDDEE        | 54.94 | 3040.393 | 0.8  | 1014.472 | 3 | 42.04 | 10 |                               |
| NB | PBC32914.1 | FLLLPATDNNYFHQKLPSSLRSKSL          | 47.88 | 2888.555 | 1.7  | 578.7192 | 5 | 54.83 | 13 |                               |
| NB | PBC32914.1 | YVASLARTGDLPIRGQ                   | 44.56 | 1715.932 | 1    | 858.974  | 2 | 24.87 | 10 |                               |
| NB | PBC32914.1 | NVGSVAREHGLPYa                     | 43.9  | 1396.721 | 1    | 699.3685 | 2 | 17.05 | 11 | Amidation                     |
| NB | PBC32914.1 | NIASLIRDYDQSRENRVSFPa              | 40.86 | 2378.209 | 0.9  | 793.7443 | 3 | 48.95 | 11 | Amidation                     |
| NB | PBC32914.1 | NVGTLARDFALPPa                     | 39.83 | 1368.751 | 1.4  | 685.3839 | 2 | 44    | 19 | Amidation                     |
| NB | PBC32914.1 | SISSLARTGDLPVREQ                   | 39.66 | 1727.917 | 1.5  | 576.9803 | 3 | 23.16 | 8  |                               |
| NB | PBC32914.1 | YVASLARTGDLPIRa                    | 36.12 | 1529.868 | 0.5  | 510.9635 | 3 | 22.56 | 6  | Amidation                     |
| NB | PBC32914.1 | NVASLARTYTLPQNAa                   | 34.95 | 1616.863 | 1.2  | 809.4399 | 2 | 30.41 | 7  | Amidation                     |
| NB | PBC32914.1 | GIFVPGSVILRALSRQa                  | 42.55 | 1711.026 | 1.8  | 856.5216 | 2 | 70.58 | 13 | Amidation                     |
| NB | PBC32914.1 | SVSSLAKNSAWPVSL                    | 38.37 | 1544.82  | 1.6  | 773.4184 | 2 | 53.19 | 5  |                               |
| NB | PBC34787.1 | AYTYVSEYKRLPVYNFGIa                | 51.99 | 2181.126 | 0.6  | 1091.571 | 2 | 58.6  | 7  | Amidation                     |

|    |                |                              |       |          |      |          |   |       |    |                               |
|----|----------------|------------------------------|-------|----------|------|----------|---|-------|----|-------------------------------|
| NB | PBC34787.1     | PNDMLSQRYHFGLa               | 48.95 | 1575.762 | 0.4  | 788.8884 | 2 | 32.82 | 5  | Amidation                     |
| NB | PBC34787.1     | AVHYSGGQPLGSKRPNDMLSQRYHFGLa | 47.29 | 3013.509 | 1.4  | 754.3856 | 4 | 26.02 | 14 | Amidation                     |
| NB | PBC34787.1     | AVHYSGGQPLGS                 | 37.66 | 1171.562 | 0.7  | 586.7888 | 2 | 13.39 | 6  |                               |
| NB | PBC34787.1     | RQYSFGLa                     | 31.08 | 868.4555 | 0.6  | 435.2353 | 2 | 21.52 | 3  | Amidation                     |
| NB | PBC34787.1     | WIDTNDNKRGRDYSFGLa           | 28.42 | 2054.992 | 1.5  | 686.0057 | 3 | 26.77 | 3  | Amidation                     |
| NB | PBC34787.1     | LDYLPVDNPAFH                 | 42.16 | 1399.677 | 1.7  | 700.847  | 2 | 52.91 | 3  |                               |
| NB | PBC34787.1     | YPLRLNLD                     | 32.63 | 1002.55  | 0.2  | 502.2823 | 2 | 35.29 | 3  |                               |
| NB | PBC34787.1     | GRDYSFGLa                    | 30.69 | 912.4453 | 0.4  | 457.2301 | 2 | 24.05 | 3  | Amidation                     |
| NB | PBC34787.1     | GRQPYSFGLa                   | 30.68 | 1022.53  | 0.4  | 512.2723 | 2 | 23.69 | 5  | Amidation                     |
| NB | XP_016905690.1 | LNSDSRNSQVNGYTPRLa           | 44.7  | 1918.961 | 1.8  | 640.662  | 3 | 15.42 | 3  | Amidation                     |
| NB | XP_016905690.1 | SNAPVSNLNFN                  | 42.02 | 1175.557 | 1.4  | 588.7867 | 2 | 30.68 | 3  |                               |
| NB | XP_016905690.1 | NSDSRNSQVNGYTPRLa            | 40.74 | 1805.877 | 1.5  | 602.9671 | 3 | 14.5  | 3  | Amidation                     |
| NB | XP_016905690.1 | RASGLLSYPRIa                 | 25.05 | 1230.72  | 0.3  | 411.2473 | 3 | 22.05 | 3  | Amidation                     |
| NB | XP_016908608.1 | LTNYLATGHRTNGGPVI            | 51.9  | 1782.938 | 1    | 892.477  | 2 | 24.82 | 11 |                               |
| NB | XP_016908608.1 | NLDEIDRVGWSGFV               | 49.71 | 1605.779 | 2.2  | 803.8984 | 2 | 74.07 | 6  |                               |
| NB | XP_016908608.1 | LTNYLATGHRTNGGPVIRRFa        | 35.11 | 2241.224 | 0.8  | 748.0826 | 3 | 18.66 | 14 | Amidation                     |
| NB | XP_016908608.1 | NIDEIDRTAFDNFF               | 48.19 | 1715.779 | 1    | 858.8976 | 2 | 83.39 | 6  |                               |
| NB | XP_016908970.1 | MVPVPVHHMADELLRSGPDTVI       | 54.41 | 2412.229 | 0.5  | 1207.123 | 2 | 60.48 | 21 |                               |
| NB | XP_016908970.1 | VHHMADELLRSGPDTVI            | 51.6  | 1888.947 | 0.8  | 945.4813 | 2 | 32.22 | 9  |                               |
| NB | XP_016908970.1 | MVPVPVHHMADEL                | 33.03 | 1473.711 | 1.3  | 737.8636 | 2 | 27.55 | 4  |                               |
| NB | XP_016908970.1 | LRSGPDTVI                    | 25.3  | 956.5291 | 0.3  | 479.2719 | 2 | 16.69 | 3  |                               |
| NB | XP_016908970.1 | VPVPVHHMADELL                | 47.4  | 1455.754 | 0.2  | 728.8846 | 2 | 32.18 | 6  |                               |
| NB | XP_016920932.1 | TWKSPDIVIRFa                 | 44.03 | 1359.766 | 0.2  | 454.2628 | 3 | 42.36 | 11 | Amidation                     |
| NB | XP_016920932.1 | GRNDLNFIRYa                  | 42.19 | 1265.663 | 1.3  | 633.8395 | 2 | 23.39 | 5  | Amidation                     |
| PF | PBC25365.1     | pQQFDDYGHLRFa                | 36.55 | 1406.637 | -1.5 | 704.3246 | 2 | 56.2  | 15 | Pyro-glu from Q;<br>Amidation |

|    |            |                                                 |       |          |      |          |   |       |    |           |
|----|------------|-------------------------------------------------|-------|----------|------|----------|---|-------|----|-----------|
| PF | PBC27532.1 | LVDHRIPDLENEMF                                  | 57.77 | 1726.835 | 2    | 864.4264 | 2 | 49.65 | 10 |           |
| PF | PBC27532.1 | ISYDTYDERELSRDHPPLLL                            | 53.81 | 2431.202 | 1.3  | 811.4089 | 3 | 50.84 | 16 |           |
| PF | PBC27532.1 | SLPLYGGNMSKTGDSRLKSEFE                          | 52.9  | 2415.174 | 1.1  | 806.0662 | 3 | 30.78 | 16 |           |
| PF | PBC27532.1 | SLPLYGGNMSKTGDSRLKSE                            | 52.19 | 2139.063 | 1.2  | 1070.54  | 2 | 15.87 | 8  |           |
| PF | PBC27532.1 | HPISYDTYDERELSRDHPPLLL                          | 51.83 | 2665.314 | 1.1  | 889.4461 | 3 | 40.68 | 31 |           |
| PF | PBC27532.1 | IGSLSIVNSMDVLRQRVLELARRKALQD<br>QAQIDANRRLLETIa | 40.04 | 4913.782 | 2.3  | 983.766  | 5 | 87.46 | 19 | Amidation |
| PF | PBC27532.1 | ARRKALQDQAQIDANRRLLETIa                         | 26.54 | 2577.458 | 0.2  | 516.4989 | 5 | 21.29 | 6  | Amidation |
| PF | PBC27532.1 | LVDHRIPDLENEMFDSGNDPGSTVVRT                     | 72.85 | 3012.425 | 0.5  | 1005.149 | 3 | 50.35 | 25 |           |
| PF | PBC27982.1 | ITGQGNRIF                                       | 44.58 | 1004.54  | 0.3  | 503.2776 | 2 | 15.7  | 12 |           |
| PF | PBC27982.1 | SLKAPFA                                         | 33.45 | 732.417  | -0.4 | 367.2156 | 2 | 18.98 | 3  |           |
| PF | PBC27985.1 | YLLSGKARYa                                      | 30.64 | 1068.608 | 0.9  | 535.3118 | 2 | 10.92 | 4  | Amidation |
| PF | PBC28057.1 | GNNRPVYIPQRPPLHP                                | 52.22 | 1837.97  | 0.5  | 919.9927 | 2 | 17.43 | 18 |           |
| PF | PBC28057.1 | GNNRPVYIPQRPPLHPRL                              | 49.35 | 2107.155 | 0.4  | 703.3926 | 3 | 17.9  | 21 |           |
| PF | PBC28057.1 | PVYIPQRPPLHP                                    | 42.58 | 1396.762 | 0.4  | 466.5946 | 3 | 21.67 | 7  |           |
| PF | PBC28214.1 | GLDLGLSRGFSGSQAAKHLMGLAAANYA<br>GGPa            | 63.47 | 2985.524 | 2.3  | 747.39   | 4 | 69.13 | 14 | Amidation |
| PF | PBC28214.1 | GLDLGLSRGFSGSQAAKH                              | 45.58 | 1799.928 | 1.1  | 900.9721 | 2 | 22.16 | 8  |           |
| PF | PBC28214.1 | GLDLGLSRGFSGSQAA                                | 58.47 | 1534.774 | 2.1  | 768.3959 | 2 | 42.52 | 5  |           |
| PF | PBC28214.1 | GLDLGLSRGFSGSQAAKHLMa                           | 25.64 | 2043.068 | 0.4  | 682.0303 | 3 | 41.15 | 4  | Amidation |
| PF | PBC28214.1 | HLMGLAAANYAGGPa                                 | 41.31 | 1340.666 | 1.6  | 671.3413 | 2 | 26.72 | 8  | Amidation |
| PF | PBC30406.1 | SDPHLSIGILSKPISAIPSSKFDD                        | 66.06 | 2523.322 | 1.2  | 842.1157 | 3 | 58.92 | 17 |           |
| PF | PBC30406.1 | SQRSPSLRLRFa                                    | 38.3  | 1344.774 | -0.2 | 449.2651 | 3 | 14.04 | 4  | Amidation |
| PF | PBC30406.1 | SPSLRLRFa                                       | 37.71 | 973.5821 | 0.2  | 487.7984 | 2 | 16.5  | 4  | Amidation |
| PF | PBC30406.1 | SDPHLSIGILSKPISAIP                              | 27.97 | 1844.041 | 1.2  | 923.0287 | 2 | 63.92 | 8  |           |
| PF | PBC30406.1 | SDPHLSIGILSKP                                   | 37.51 | 1362.751 | -0.6 | 455.2573 | 3 | 31.93 | 9  |           |

|    |            |                           |       |          |      |          |   |       |    |                               |
|----|------------|---------------------------|-------|----------|------|----------|---|-------|----|-------------------------------|
| PF | PBC31004.1 | pQMFTYSHGWTNa             | 42.17 | 1352.561 | 1.5  | 677.2887 | 2 | 53.87 | 6  | Pyro-glu from Q;<br>Amidation |
| PF | PBC31004.1 | SFSENMINDHRQPASTNNNY      | 56.41 | 2338.003 | -0.2 | 1170.009 | 2 | 20.18 | 7  |                               |
| PF | PBC31251.1 | AYRKPPFNNGSIFa            | 39.22 | 1394.746 | 1.1  | 698.381  | 2 | 23.96 | 9  | Amidation                     |
| PF | PBC31251.1 | RKPPFNNGSIFa              | 27.47 | 1160.645 | 1.8  | 581.331  | 2 | 20.02 | 3  | Amidation                     |
| PF | PBC31251.1 | KPPFNNGSIFa               | 25.66 | 1004.544 | 0.6  | 503.2798 | 2 | 29.89 | 3  | Amidation                     |
| PF | PBC31431.1 | APVGYQEMQGGKNSASLNSENFGIF | 77.23 | 2715.296 | 0.2  | 1358.656 | 2 | 48.2  | 11 |                               |
| PF | PBC31431.1 | NSIINDVKNELFPEDIN         | 57.78 | 1972.974 | 1.6  | 987.4959 | 2 | 84.36 | 25 |                               |
| PF | PBC31431.1 | ARMGFHGMRa                | 51.41 | 1060.517 | 0.9  | 531.2663 | 2 | 6.72  | 21 | Amidation                     |
| PF | PBC31431.1 | APMGFQGMRG                | 46.15 | 1050.474 | 0.4  | 526.2444 | 2 | 19.43 | 3  |                               |
| PF | PBC31431.1 | STDFQDVESGSESKRARMGFHGMRa | 45.36 | 2860.313 | 1.5  | 716.0867 | 4 | 24.71 | 5  | Amidation                     |
| PF | PBC31431.1 | SPFRYLGV                  | 45.28 | 937.5021 | 0.6  | 469.7586 | 2 | 35.51 | 7  |                               |
| PF | PBC31431.1 | APMGFQGMRa                | 44.07 | 992.4684 | -0.1 | 497.2415 | 2 | 15.49 | 6  | Amidation                     |
| PF | PBC31431.1 | APMGFYGTRG                | 41.45 | 1055.486 | 0.8  | 528.7506 | 2 | 18.36 | 3  |                               |
| PF | PBC31431.1 | ARMGFHGMRG                | 40.87 | 1118.523 | -0.6 | 373.8479 | 3 | 9.39  | 3  |                               |
| PF | PBC31431.1 | ALMGFQGVRG                | 39.1  | 1034.533 | 0.9  | 518.2743 | 2 | 25.78 | 3  |                               |
| PF | PBC31431.1 | APMGFYGTRa                | 39.01 | 997.4803 | 0.6  | 499.7478 | 2 | 15.72 | 4  | Amidation                     |
| PF | PBC31431.1 | ALMGFQGVRa                | 37.61 | 976.5276 | 0.6  | 489.2714 | 2 | 22.47 | 4  | Amidation                     |
| PF | PBC31431.1 | SPFRYLGVRa                | 34.87 | 1092.619 | 0.9  | 547.3174 | 2 | 16.65 | 10 | Amidation                     |
| PF | PBC31431.1 | ASFDDEYY                  | 26.92 | 1008.371 | 0.4  | 505.1931 | 2 | 32.7  | 4  |                               |
| PF | PBC31431.1 | ASFDDEYYKRAPMGFQGMRa      | 54.61 | 2267.025 | 0.7  | 567.764  | 4 | 30.79 | 8  | Amidation                     |
| PF | PBC31431.1 | STDFQDVESGSESF            | 46.63 | 1533.611 | 1.5  | 767.8138 | 2 | 44.9  | 12 |                               |
| PF | PBC32274.1 | pQLHNIIDKPRQN             | 47.32 | 1457.774 | 1.2  | 729.8951 | 2 | 16.62 | 6  | Pyro-glu from Q               |
| PF | PBC32274.1 | pQLHNIIDKPRQNFNDP         | 40.55 | 1930.965 | 1.2  | 966.4909 | 2 | 26.43 | 6  | Pyro-glu from Q               |
| PF | PBC32274.1 | pQITQFTPRLa               | 39.64 | 1084.603 | 1    | 543.3093 | 2 | 54    | 4  | Pyro-glu from Q;<br>Amidation |

|    |            |                              |       |          |      |          |   |       |    |                               |
|----|------------|------------------------------|-------|----------|------|----------|---|-------|----|-------------------------------|
| PF | PBC32274.1 | SGMWFGPRLa                   | 39.39 | 1048.528 | 1.1  | 525.2717 | 2 | 47.79 | 4  | Amidation                     |
| PF | PBC32274.1 | RVPWTPSPRLa                  | 39.12 | 1206.699 | 0.6  | 604.3569 | 2 | 19.13 | 7  | Amidation                     |
| PF | PBC32274.1 | VPWTPSPRLa                   | 37.19 | 1050.597 | 0.4  | 526.3062 | 2 | 24.2  | 4  | Amidation                     |
| PF | PBC32274.1 | pQLHNIIDKPRQNFNDPRF          | 30.58 | 2234.135 | 1.6  | 559.5418 | 4 | 32.43 | 4  | Pyro-glu from Q               |
| PF | PBC32274.1 | TSQDITSGMWFGPRLa             | 46.98 | 1693.825 | 1.5  | 847.9208 | 2 | 62.81 | 10 | Amidation                     |
| PF | PBC32274.1 | SQDITSGMWFGPRLa              | 39.1  | 1592.777 | 1.5  | 797.397  | 2 | 66.63 | 4  | Amidation                     |
| PF | PBC32274.1 | pQLHNIIDKP                   | 37.74 | 1059.571 | 0.2  | 530.793  | 2 | 24.59 | 3  | Pyro-glu from Q               |
| PF | PBC32274.1 | DITSGMWFGPRLa                | 36.73 | 1377.686 | 1.7  | 689.8516 | 2 | 76.96 | 4  | Amidation                     |
| PF | PBC32274.1 | GMWFGPRLa                    | 25.78 | 961.4956 | 0.9  | 481.7555 | 2 | 49.4  | 6  | Amidation                     |
| PF | PBC32496.1 | IPAADKERLLN                  | 44.95 | 1238.698 | -0.1 | 620.3563 | 2 | 15.01 | 4  |                               |
| PF | PBC32496.1 | LRNQLDIGDLQ                  | 43.76 | 1283.683 | 2.6  | 642.8506 | 2 | 30.89 | 5  |                               |
| PF | PBC32496.1 | SYWKQCAFNAVSCFa              | 41.11 | 1651.728 | 1.9  | 826.8726 | 2 | 69.18 | 7  | Amidation                     |
| PF | PBC32545.1 | NSELINSLGLPKNMNNAa           | 50.59 | 1940.015 | 1.2  | 971.0159 | 2 | 72.01 | 11 | Amidation                     |
| PF | PBC32608.1 | IDLSRFYGHFNT                 | 52.52 | 1468.71  | 1.3  | 735.3632 | 2 | 47.67 | 11 |                               |
| PF | PBC32608.1 | IDLSRFYGHF                   | 45.01 | 1253.619 | 0.3  | 627.8171 | 2 | 52.78 | 9  |                               |
| PF | PBC32608.1 | IDLSRFYGHFNTKR               | 38.28 | 1752.906 | 0.4  | 439.2339 | 4 | 27.86 | 5  |                               |
| PF | PBC32608.1 | DLSRFYGHF                    | 26.3  | 1140.535 | 0.7  | 571.2753 | 2 | 35.46 | 8  |                               |
| PF | PBC32608.1 | IDLSRFYGHFNTK                | 34.1  | 1596.805 | -0.9 | 533.2751 | 3 | 35.46 | 10 |                               |
| PF | PBC32678.1 | pQDVDHVFLRFa                 | 43.61 | 1256.63  | 1.4  | 629.3232 | 2 | 60.92 | 9  | Pyro-glu from Q;<br>Amidation |
| PF | PBC32678.1 | pQDVDHVFLR                   | 36.49 | 1110.546 | -0.8 | 556.2797 | 2 | 32.82 | 3  | Pyro-glu from Q               |
| PF | PBC32678.1 | QDVDHVFLRFa                  | 30.34 | 1273.657 | 2.2  | 637.837  | 2 | 35.62 | 10 | Amidation                     |
| PF | PBC32727.1 | SQAYDPYSNAAQFQLSSQSRGYPYQHRL | 62.05 | 3261.523 | 1.3  | 816.389  | 4 | 38.35 | 9  |                               |
| PF | PBC32727.1 | LPTNLGEDTKKTEQTMRPKS         | 55.51 | 2273.169 | 1.6  | 569.3003 | 4 | 15.34 | 14 |                               |
| PF | PBC32727.1 | YPYQHRLIY                    | 44.17 | 1251.64  | 0.7  | 626.8277 | 2 | 19.76 | 5  |                               |
| PF | PBC32727.1 | NVPIYQEPFR                   | 40.73 | 1261.646 | 0.6  | 631.8304 | 2 | 32.28 | 3  |                               |

|    |            |                                    |       |          |      |          |   |       |    |           |
|----|------------|------------------------------------|-------|----------|------|----------|---|-------|----|-----------|
| PF | PBC32727.1 | SQAYDPYSNAAQFQLSSQSRGYQYQHRLI<br>Y | 67.17 | 3537.67  | 1.4  | 885.4261 | 4 | 48.14 | 22 |           |
| PF | PBC32727.1 | SQAYDPYSNAAQFQLSSQSRGYQYQHRLI      | 42.19 | 3374.607 | 1.3  | 844.66   | 4 | 46.04 | 3  |           |
| PF | PBC32727.1 | VPIYQEPFR                          | 39.88 | 1147.603 | 0.8  | 574.809  | 2 | 30.27 | 4  |           |
| PF | PBC32727.1 | GYPYQHRLIY                         | 35.91 | 1308.662 | 1.2  | 655.3388 | 2 | 20.49 | 7  |           |
| PF | PBC32914.1 | SIATLAKNDDLPISLHDRMAENEDDEE        | 66.67 | 3040.393 | 0.9  | 1014.473 | 3 | 41.42 | 13 |           |
| PF | PBC32914.1 | FLLLPATDNNYFHQKLPSSLRKSL           | 51.8  | 2888.555 | 0.9  | 963.8597 | 3 | 53.93 | 7  |           |
| PF | PBC32914.1 | YVASLARTGDLPIRGQ                   | 48.79 | 1715.932 | 0.7  | 858.9738 | 2 | 24.81 | 12 |           |
| PF | PBC32914.1 | NVGSVAREHGLPYa                     | 47.94 | 1396.721 | 1    | 699.3685 | 2 | 15.44 | 7  | Amidation |
| PF | PBC32914.1 | NVASLARTYTLQNAa                    | 47.62 | 1616.863 | 1.3  | 809.44   | 2 | 30.12 | 4  | Amidation |
| PF | PBC32914.1 | NIASLIRDYDQSRENRVSPa               | 46.82 | 2378.209 | 0.5  | 793.744  | 3 | 48.39 | 10 | Amidation |
| PF | PBC32914.1 | SISSLARTGDLPVREQ                   | 45.9  | 1727.917 | 1.2  | 576.9802 | 3 | 23.96 | 9  |           |
| PF | PBC32914.1 | NVGTLLARDFALPPa                    | 45.12 | 1368.751 | 1.3  | 685.3839 | 2 | 44.83 | 20 | Amidation |
| PF | PBC32914.1 | YVASLARTGDLPIRa                    | 37.25 | 1529.868 | 0.5  | 510.9634 | 3 | 22.77 | 6  | Amidation |
| PF | PBC32914.1 | SVSSLAKNSAWPVSL                    | 47.07 | 1544.82  | 2.4  | 773.419  | 2 | 52.64 | 6  |           |
| PF | PBC32914.1 | GIFVPGSVILRALSRQa                  | 38.99 | 1711.026 | 0.9  | 571.3497 | 3 | 69.51 | 19 | Amidation |
| PF | PBC34787.1 | AYTYVSEYKRLPVYNFGLa                | 59.77 | 2181.126 | 0.7  | 1091.571 | 2 | 58.48 | 9  | Amidation |
| PF | PBC34787.1 | PNDMLSQRYPHFGLa                    | 59.21 | 1575.762 | 1    | 788.8889 | 2 | 32.45 | 8  | Amidation |
| PF | PBC34787.1 | AVHYSGGQPLGSKRPNDMLSQRYPHFGLa      | 50.41 | 3013.509 | 0.8  | 1005.511 | 3 | 26.04 | 12 | Amidation |
| PF | PBC34787.1 | AVHYSGGQPLGS                       | 38.4  | 1171.562 | 1    | 586.7889 | 2 | 13.02 | 5  |           |
| PF | PBC34787.1 | RQYSFGLa                           | 33.4  | 868.4555 | -0.2 | 435.235  | 2 | 19.76 | 3  | Amidation |
| PF | PBC34787.1 | WIDTNDNKRGRDYSFGLa                 | 30.34 | 2054.992 | 1.4  | 686.0056 | 3 | 26.1  | 4  | Amidation |
| PF | PBC34787.1 | LDYLPVDNPAFH                       | 48.74 | 1399.677 | 1    | 700.8466 | 2 | 53.02 | 6  |           |
| PF | PBC34787.1 | GRQPYSFGLa                         | 33.85 | 1022.53  | 1.3  | 512.2728 | 2 | 23.75 | 5  | Amidation |
| PF | PBC34787.1 | GRDYSFGLa                          | 29.14 | 912.4453 | 0    | 457.2299 | 2 | 23.11 | 7  | Amidation |
| PF | PBC34787.1 | YPLRLNLD                           | 28.83 | 1002.55  | 0.5  | 502.2824 | 2 | 34.88 | 3  |           |

|    |                |                                                 |       |          |      |          |   |       |    |                               |
|----|----------------|-------------------------------------------------|-------|----------|------|----------|---|-------|----|-------------------------------|
| PF | XP_016905690.1 | LNSDSRNSQVNGYTPRLa                              | 51.57 | 1918.961 | 1.2  | 640.6617 | 3 | 15.11 | 5  | Amidation                     |
| PF | XP_016905690.1 | NSDSRNSQVNGYTPRLa                               | 49.71 | 1805.877 | 1.4  | 602.967  | 3 | 14.65 | 4  | Amidation                     |
| PF | XP_016905690.1 | RASGLLSYPRIa                                    | 37.06 | 1230.72  | 1.3  | 616.3679 | 2 | 20.79 | 4  | Amidation                     |
| PF | XP_016908608.1 | LTNYLATGHRTNGGPVI                               | 61.58 | 1782.938 | -0.6 | 892.4755 | 2 | 24.48 | 7  |                               |
| PF | XP_016908608.1 | NLDEIDRVGWSGFV                                  | 55.78 | 1605.779 | 1.8  | 803.8981 | 2 | 73.08 | 9  |                               |
| PF | XP_016908608.1 | LTNYLATGHRTNGGPVIRRFa                           | 38.36 | 2241.224 | 0.2  | 449.2522 | 5 | 15.5  | 13 | Amidation                     |
| PF | XP_016908608.1 | NIDEIDRTAFDNFF                                  | 54.7  | 1715.779 | 0.8  | 858.8975 | 2 | 83.7  | 6  |                               |
| PF | XP_016908970.1 | MVPVPVHHMADELLRSGPDTVI                          | 63.82 | 2412.229 | 1    | 1207.123 | 2 | 59.89 | 23 |                               |
| PF | XP_016908970.1 | VHHMADELLRSGPDTVI                               | 59.42 | 1888.947 | 1    | 945.4814 | 2 | 31.3  | 12 |                               |
| PF | XP_016908970.1 | MVPVPVHHMADEL                                   | 38.66 | 1473.711 | 0.6  | 737.8632 | 2 | 26.32 | 4  |                               |
| PF | XP_016908970.1 | LRS GPDTVI                                      | 33.3  | 956.5291 | 0.5  | 479.2721 | 2 | 16.34 | 3  |                               |
| PF | XP_016908970.1 | VPVPVHHMADELL                                   | 33.21 | 1455.754 | 1.1  | 728.8853 | 2 | 31.73 | 13 |                               |
| PF | XP_016920932.1 | TWKSPDIVIRFa                                    | 42.29 | 1359.766 | 0.3  | 454.2628 | 3 | 41.77 | 11 | Amidation                     |
| PF | XP_016920932.1 | GRNDLNFIRYa                                     | 46.06 | 1265.663 | 0.5  | 633.839  | 2 | 23.5  | 8  | Amidation                     |
| NF | PBC25365.1     | pQQFDDYGHLRFa                                   | 57.86 | 1406.637 | 1.1  | 704.3264 | 2 | 57.22 | 3  | Pyro-glu from Q;<br>Amidation |
| NF | PBC27532.1     | SLPLYGGNMSKTGDSRLKSEFE                          | 72.83 | 2415.174 | -1.7 | 1208.592 | 2 | 29.14 | 9  |                               |
| NF | PBC27532.1     | SLPLYGGNMSKTGDSRLKSE                            | 70.09 | 2139.063 | -1.1 | 1070.538 | 2 | 19.53 | 9  |                               |
| NF | PBC27532.1     | HPISYD TYDERELSRDHPPLLL                         | 51.4  | 2665.314 | 1.7  | 889.4467 | 3 | 40.88 | 12 |                               |
| NF | PBC27532.1     | ARRKALQDQAQIDANRRLLETIa                         | 50.38 | 2577.458 | 0.9  | 645.3723 | 4 | 21.77 | 9  | Amidation                     |
| NF | PBC27532.1     | LVDHRIPDLENEMF                                  | 49.87 | 1726.835 | 1.2  | 576.6196 | 3 | 48.67 | 5  |                               |
| NF | PBC27532.1     | ISYD TYDERELSRDHPPLLL                           | 47.14 | 2431.202 | -1.4 | 811.4067 | 3 | 49.77 | 5  |                               |
| NF | PBC27532.1     | IGSLSIVNSMDVLRQRVLELARRKALQD<br>QAQIDANRRLLETIa | 32.59 | 4913.782 | 2.9  | 819.9734 | 6 | 88.02 | 6  | Amidation                     |
| NF | PBC27532.1     | LVDHRIPDLENEMFDSGNDPGSTVVRT                     | 69.38 | 3012.425 | 2.7  | 1005.152 | 3 | 56.97 | 3  |                               |
| NF | PBC27982.1     | ITGQGNRIF                                       | 47.84 | 1004.54  | 1    | 503.2779 | 2 | 17.63 | 4  |                               |



|    |            |                                      |       |          |      |          |   |       |    |                               |
|----|------------|--------------------------------------|-------|----------|------|----------|---|-------|----|-------------------------------|
| NF | PBC27982.1 | SLKAPFA                              | 35.82 | 732.417  | -1.3 | 367.2153 | 2 | 19.3  | 3  |                               |
| NF | PBC27985.1 | YLLSGKARYa                           | 28.55 | 1068.608 | 0.4  | 535.3115 | 2 | 11.92 | 6  | Amidation                     |
| NF | PBC28057.1 | GNNRPVYIPQRPPHP                      | 61.04 | 1837.97  | 0.9  | 613.6645 | 3 | 13.46 | 17 |                               |
| NF | PBC28057.1 | GNNRPVYIPQRPPHPRL                    | 57.25 | 2107.155 | 1.7  | 703.3935 | 3 | 15.04 | 61 |                               |
| NF | PBC28057.1 | PVYIPQRPPHP                          | 42.53 | 1396.762 | 0    | 466.5945 | 3 | 18.93 | 7  |                               |
| NF | PBC28214.1 | GLDLGLSRGFSGSQAAKHLMGLAAANYA<br>GGPa | 48.64 | 2985.524 | 2.3  | 996.1843 | 3 | 69.28 | 8  | Amidation                     |
| NF | PBC28214.1 | GLDLGLSRGFSGSQAA                     | 38.12 | 1534.774 | 1.7  | 768.3955 | 2 | 42.16 | 5  |                               |
| NF | PBC28214.1 | GLDLGLSRGFSGSQAACH                   | 35.47 | 1799.928 | 0.4  | 450.9894 | 4 | 18.94 | 4  |                               |
| NF | PBC28214.1 | HLMGLAAANYAGGPa                      | 52.17 | 1340.666 | 0.2  | 671.3403 | 2 | 24.83 | 3  | Amidation                     |
| NF | PBC28214.1 | GLDLGLSRGFSGSQAAKHLMa                | 53.99 | 2985.524 | -1.5 | 1493.767 | 2 | 69.37 | 19 | Amidation                     |
| NF | PBC30406.1 | SDPHLSIGILSKPISAI PSSKFDD            | 66.11 | 2523.322 | -2.7 | 1262.665 | 2 | 57.71 | 9  |                               |
| NF | PBC30406.1 | SQRSPSLRLRFa                         | 41.59 | 1344.774 | 0.2  | 449.2653 | 3 | 13.35 | 8  | Amidation                     |
| NF | PBC30406.1 | SPSLRLRFa                            | 33.76 | 973.5821 | 0.3  | 487.7985 | 2 | 17.83 | 3  | Amidation                     |
| NF | PBC30406.1 | SDPHLSIGILSKPISAI P                  | 33.69 | 1844.041 | 3.3  | 923.0306 | 2 | 63.22 | 6  |                               |
| NF | PBC30406.1 | SDPHLSIGILSKP                        | 56.41 | 1362.751 | 0.6  | 682.3831 | 2 | 30.59 | 3  |                               |
| NF | PBC31004.1 | pQMFTYSHGWTNa                        | 35.37 | 1352.561 | 2.1  | 677.2891 | 2 | 54.56 | 16 | Pyro-glu from Q;<br>Amidation |
| NF | PBC31251.1 | AYRKPPFN SIFa                        | 56.07 | 1394.746 | 1.2  | 698.381  | 2 | 20.1  | 23 | Amidation                     |
| NF | PBC31251.1 | KPPFN SIFa                           | 39.77 | 1004.544 | 0.3  | 503.2796 | 2 | 26.3  | 8  | Amidation                     |
| NF | PBC31251.1 | RKPPFN SIFa                          | 28.99 | 1160.645 | 0.6  | 581.3303 | 2 | 20.94 | 6  | Amidation                     |
| NF | PBC31431.1 | APVGYQEMQGKKNSASLNSENF GIF           | 76.23 | 2715.296 | 0.9  | 1358.657 | 2 | 47.19 | 9  |                               |
| NF | PBC31431.1 | NSIINDVKNELFPEDIN                    | 61.58 | 1972.974 | 1.8  | 987.4961 | 2 | 85.69 | 17 |                               |
| NF | PBC31431.1 | ARMGFHGMRa                           | 56.1  | 1060.517 | 0.4  | 531.2661 | 2 | 8.49  | 4  | Amidation                     |
| NF | PBC31431.1 | STDFQDVESGSE SFKRARMGFHGMRa          | 52.07 | 2860.313 | -0.9 | 477.7257 | 6 | 24.04 | 8  | Amidation                     |
| NF | PBC31431.1 | SPFRYLG V                            | 49.43 | 937.5021 | 0.4  | 469.7585 | 2 | 34.68 | 6  |                               |

|    |            |                      |       |          |      |          |   |       |    |                               |
|----|------------|----------------------|-------|----------|------|----------|---|-------|----|-------------------------------|
| NF | PBC31431.1 | APMGFQGMRG           | 46.35 | 1050.474 | 1    | 526.2448 | 2 | 19.72 | 4  |                               |
| NF | PBC31431.1 | ARMGFHGMRG           | 45.29 | 1118.523 | -0.7 | 373.8479 | 3 | 9.3   | 3  |                               |
| NF | PBC31431.1 | APMGFYGTRa           | 45.15 | 997.4803 | 0.5  | 499.7477 | 2 | 15.19 | 4  | Amidation                     |
| NF | PBC31431.1 | APMGFYGTRG           | 44.23 | 1055.486 | 0.1  | 528.7502 | 2 | 17.78 | 3  |                               |
| NF | PBC31431.1 | APMGFQGMRa           | 43.83 | 992.4684 | -0.1 | 497.2414 | 2 | 16.14 | 3  | Amidation                     |
| NF | PBC31431.1 | ALMGFQGVRG           | 42.24 | 1034.533 | 0    | 518.2738 | 2 | 25.21 | 3  |                               |
| NF | PBC31431.1 | ALMGFQGVRa           | 39.26 | 976.5276 | 1.2  | 489.2717 | 2 | 22.01 | 3  | Amidation                     |
| NF | PBC31431.1 | SPFRYLGVRa           | 36.21 | 1092.619 | -0.1 | 365.2137 | 3 | 17.16 | 3  | Amidation                     |
| NF | PBC31431.1 | ASFDDEYY             | 24.23 | 1008.371 | 0.2  | 505.193  | 2 | 32.63 | 3  |                               |
| NF | PBC31431.1 | ASFDDEYYKRAPMGFQGMRa | 64.73 | 2267.025 | 1.2  | 567.7642 | 4 | 26.98 | 10 | Amidation                     |
| NF | PBC31431.1 | STDFQDVESGSESF       | 43.46 | 1533.611 | 1.2  | 767.8135 | 2 | 45.7  | 8  |                               |
| NF | PBC32274.1 | RVPWTPSPRLa          | 42.45 | 1206.699 | 1.2  | 604.3572 | 2 | 18.98 | 4  | Amidation                     |
| NF | PBC32274.1 | pQLHNIIDKPRQN        | 41.7  | 1457.774 | 3.2  | 729.8966 | 2 | 15.91 | 4  | Pyro-glu from Q               |
| NF | PBC32274.1 | pQLHNIIDKPRQNFNDPRF  | 33.79 | 2234.135 | 1.6  | 745.72   | 3 | 31.38 | 4  | Pyro-glu from Q               |
| NF | PBC32274.1 | pQITQFTPRLa          | 30.83 | 1084.603 | 1    | 543.3093 | 2 | 53.25 | 9  | Pyro-glu from Q;<br>Amidation |
| NF | PBC32274.1 | pQLHNIIDKPRQNFNDP    | 28.77 | 1930.965 | -2.1 | 966.4877 | 2 | 25.76 | 5  | Pyro-glu from Q               |
| NF | PBC32274.1 | SGMWFGPRLa           | 28    | 1048.528 | -0.7 | 525.2707 | 2 | 47.79 | 12 | Amidation                     |
| NF | PBC32274.1 | VPWTPSPRLa           | 27.27 | 1050.597 | 1.5  | 526.3068 | 2 | 23.67 | 3  | Amidation                     |
| NF | PBC32274.1 | DITSGMWFGPRLa        | 43.5  | 1377.686 | 1.1  | 689.8512 | 2 | 91.87 | 4  | Amidation                     |
| NF | PBC32274.1 | GMWFGPRLa            | 26.94 | 961.4956 | 0.8  | 481.7555 | 2 | 47.5  | 7  | Amidation                     |
| NF | PBC32274.1 | pQLHNIIDKP           | 33.03 | 1059.571 | 0.7  | 530.7933 | 2 | 20.67 | 12 | Pyro-glu from Q               |
| NF | PBC32274.1 | SQDITSGMWFGPRLa      | 48.18 | 1592.777 | 1    | 797.3965 | 2 | 75.27 | 4  | Amidation                     |
| NF | PBC32274.1 | TSQDITSGMWFGPRLa     | 54.49 | 1693.825 | 1.1  | 847.9205 | 2 | 72.22 | 5  | Amidation                     |
| NF | PBC32496.1 | LRNQLDIGDLQ          | 48.94 | 1283.683 | 1.5  | 642.8499 | 2 | 30.84 | 5  |                               |
| NF | PBC32496.1 | IPAADKERLLN          | 46.28 | 1238.698 | 0.4  | 620.3566 | 2 | 13.93 | 5  |                               |

|    |            |                                    |       |          |      |          |   |       |    |                               |
|----|------------|------------------------------------|-------|----------|------|----------|---|-------|----|-------------------------------|
| NF | PBC32496.1 | SYWKQCAFNAVSCFa                    | 38.98 | 1651.728 | 1.1  | 826.8719 | 2 | 70.16 | 9  | Amidation                     |
| NF | PBC32545.1 | NSELINSLGLPKNMNNAa                 | 37.17 | 1940.015 | 2.1  | 971.0167 | 2 | 71.55 | 3  | Amidation                     |
| NF | PBC32608.1 | IDLSRFYGFHF                        | 50.48 | 1253.619 | 1.4  | 627.8178 | 2 | 51.77 | 4  |                               |
| NF | PBC32608.1 | IDLSRFYGFHFNT                      | 44.72 | 1468.71  | 1    | 735.3629 | 2 | 47.98 | 3  |                               |
| NF | PBC32608.1 | IDLSRFYGFHFNTKR                    | 37.96 | 1752.906 | -0.2 | 585.3091 | 3 | 26.76 | 4  |                               |
| NF | PBC32608.1 | DLSRFYGFHF                         | 24.76 | 1140.535 | 1.2  | 571.2755 | 2 | 34.83 | 3  |                               |
| NF | PBC32608.1 | IDLSRFYGFHFNTK                     | 28.71 | 1596.805 | 1.3  | 799.4107 | 2 | 36.19 | 9  |                               |
| NF | PBC32678.1 | pQDVDHVFLR                         | 49.86 | 1110.546 | 0.4  | 556.2804 | 2 | 30.38 | 5  | Pyro-glu from Q               |
| NF | PBC32678.1 | pQDVDHVFLRFa                       | 54.14 | 1256.63  | 1    | 629.3229 | 2 | 67.87 | 16 | Pyro-glu from Q;<br>Amidation |
| NF | PBC32678.1 | QDVDHVFLRFa                        | 54.26 | 1273.657 | 0.8  | 637.8362 | 2 | 32.44 | 3  | Amidation                     |
| NF | PBC32727.1 | LPTNLGEDTKKTEQTMRPKS               | 61.45 | 2273.169 | -0.7 | 1137.591 | 2 | 14.32 | 14 |                               |
| NF | PBC32727.1 | SQAYDPYSNAAQFQLSSQSRGYQYQHRL       | 55.41 | 3261.523 | 0.5  | 1088.182 | 3 | 37.25 | 3  |                               |
| NF | PBC32727.1 | NVPIYQEPF                          | 46.81 | 1261.646 | 0.4  | 631.8303 | 2 | 31.89 | 4  |                               |
| NF | PBC32727.1 | YPYQHRLIY                          | 20.47 | 1251.64  | 1.1  | 418.2211 | 3 | 20.5  | 3  |                               |
| NF | PBC32727.1 | GYPYQHRLIY                         | 20.84 | 1308.662 | 0.3  | 437.2279 | 3 | 15.38 | 11 |                               |
| NF | PBC32727.1 | SQAYDPYSNAAQFQLSSQSRGYQYQHRLI      | 35.98 | 3374.607 | -0.2 | 1125.876 | 3 | 48.52 | 20 |                               |
| NF | PBC32727.1 | SQAYDPYSNAAQFQLSSQSRGYQYQHRLI<br>Y | 74.39 | 3537.67  | 1    | 885.4257 | 4 | 55.74 | 10 |                               |
| NF | PBC32727.1 | VPIYQEPF                           | 46.09 | 1147.603 | 1.1  | 574.8092 | 2 | 27.03 | 10 |                               |
| NF | PBC32914.1 | SIATLAKNDDLPISLHDRMAENEDDEE        | 79.73 | 3040.393 | -0.6 | 1014.471 | 3 | 41.3  | 7  |                               |
| NF | PBC32914.1 | NVASLARTYTLPQNAa                   | 58.15 | 1616.863 | 1.6  | 809.4402 | 2 | 28.93 | 3  | Amidation                     |
| NF | PBC32914.1 | NVGSVAREHGLPYa                     | 56.28 | 1396.721 | 0.6  | 699.3682 | 2 | 16.87 | 6  | Amidation                     |
| NF | PBC32914.1 | YVASLARTGDLPIRGQ                   | 53.24 | 1715.932 | 1.1  | 572.9852 | 3 | 25.03 | 9  |                               |
| NF | PBC32914.1 | FLLLPATDNNYFHQKLPSSLRSKSL          | 51.67 | 2888.555 | 2.3  | 723.1476 | 4 | 52.88 | 4  |                               |
| NF | PBC32914.1 | SISSLARTGDLPVREQ                   | 49.75 | 1727.917 | 2.1  | 576.9807 | 3 | 22.94 | 6  |                               |

|    |                |                              |       |          |      |          |   |       |    |           |
|----|----------------|------------------------------|-------|----------|------|----------|---|-------|----|-----------|
| NF | PBC32914.1     | NIASLIRDYDQSRENRVSPa         | 47.5  | 2378.209 | 0.8  | 793.7443 | 3 | 47.24 | 6  | Amidation |
| NF | PBC32914.1     | YVASLARTGDLPIRa              | 26.48 | 1529.868 | 1.1  | 765.942  | 2 | 22.24 | 3  | Amidation |
| NF | PBC32914.1     | NVGTLARDFALPPa               | 19.92 | 1368.751 | 0.2  | 685.3831 | 2 | 43.82 | 4  | Amidation |
| NF | PBC32914.1     | GIFVPGSVILRALSRQa            | 48.99 | 1711.026 | 0.9  | 571.3497 | 3 | 83.9  | 14 | Amidation |
| NF | PBC32914.1     | SVSSLAKNSAWPVSL              | 48.47 | 1544.82  | 1.4  | 773.4183 | 2 | 57.72 | 4  |           |
| NF | PBC34787.1     | PNDMLSQRYHFGLa               | 66.58 | 1575.762 | 0.1  | 788.8882 | 2 | 31.07 | 4  | Amidation |
| NF | PBC34787.1     | AVHYSGGQPLGSKRPNDMLSQRYHFGLa | 53.14 | 3013.509 | 1.1  | 754.3854 | 4 | 24.91 | 11 | Amidation |
| NF | PBC34787.1     | AYTYVSEYKRLPVYNFGla          | 49.81 | 2181.126 | -0.5 | 1091.57  | 2 | 57.15 | 4  | Amidation |
| NF | PBC34787.1     | AVHYSGGQPLGS                 | 38.77 | 1171.562 | 0.6  | 586.7887 | 2 | 13.17 | 3  |           |
| NF | PBC34787.1     | WIDTNDNKRGRDYSFGLa           | 37    | 2054.992 | 0.6  | 686.0051 | 3 | 24.87 | 6  | Amidation |
| NF | PBC34787.1     | RQYSFGLa                     | 32.4  | 868.4555 | -0.3 | 435.2349 | 2 | 19.73 | 3  | Amidation |
| NF | PBC34787.1     | GRQPYSFGLa                   | 32.58 | 1022.53  | 0.5  | 512.2724 | 2 | 18.09 | 3  | Amidation |
| NF | PBC34787.1     | YPLRLNLD                     | 34.51 | 1002.55  | 0.3  | 502.2823 | 2 | 32.93 | 8  |           |
| NF | PBC34787.1     | LDYLPVDNPAFH                 | 40.13 | 1399.677 | 2.2  | 700.8474 | 2 | 53.16 | 14 |           |
| NF | PBC34787.1     | GRDYSFGLa                    | 20.29 | 912.4453 | 0    | 457.2299 | 2 | 22.83 | 13 | Amidation |
| NF | XP_016905690.1 | RASGLLSYPRla                 | 36.91 | 1230.72  | 1.6  | 616.368  | 2 | 17.49 | 5  | Amidation |
| NF | XP_016905690.1 | LNSDSRNSQVNGYTPRLa           | 43.12 | 1918.961 | 0.8  | 640.6614 | 3 | 15.95 | 22 | Amidation |
| NF | XP_016905690.1 | NSDSRNSQVNGYTPRLa            | 30.46 | 1805.877 | 2.7  | 602.9678 | 3 | 14.09 | 18 | Amidation |
| NF | XP_016908608.1 | LTNYLATGHRTNGGPVI            | 68.44 | 1782.938 | 1.1  | 892.4771 | 2 | 23.49 | 5  |           |
| NF | XP_016908608.1 | NLDEIDRVGWSGFV               | 65.24 | 1605.779 | 1.8  | 803.8981 | 2 | 73.95 | 5  |           |
| NF | XP_016908608.1 | LTNYLATGHRTNGGPVIRRFa        | 38.87 | 2241.224 | 0.5  | 449.2524 | 5 | 17.43 | 9  | Amidation |
| NF | XP_016908608.1 | NIDEIDRTAFDNFF               | 41.27 | 1715.779 | 2.6  | 858.899  | 2 | 96.53 | 8  |           |
| NF | XP_016908970.1 | MVPVPVHHMADELLRSGPDTVI       | 64.98 | 2412.229 | -0.6 | 1207.121 | 2 | 60.24 | 11 |           |
| NF | XP_016908970.1 | VHHMADELLRSGPDTVI            | 57.42 | 1888.947 | -0.9 | 945.4797 | 2 | 30.16 | 4  |           |
| NF | XP_016908970.1 | MVPVPVHHMADEL                | 38.96 | 1473.711 | 1.1  | 737.8635 | 2 | 26.34 | 6  |           |

|    |                |               |       |          |      |          |   |       |   |           |
|----|----------------|---------------|-------|----------|------|----------|---|-------|---|-----------|
| NF | XP_016908970.1 | LRS GPDTVI    | 33.48 | 956.5291 | 0.2  | 479.2719 | 2 | 15.76 | 3 |           |
| NF | XP_016908970.1 | VPVPVHHMADELL | 31.46 | 1455.754 | 0.5  | 486.259  | 3 | 33.15 | 4 |           |
| NF | XP_016920932.1 | TWKSPDIVIRFa  | 49.3  | 1359.766 | 0.3  | 454.2628 | 3 | 40.95 | 9 | Amidation |
| NF | XP_016920932.1 | GRNDLNFIRYa   | 47.92 | 1265.663 | -0.1 | 422.8949 | 3 | 17.89 | 3 | Amidation |

**Table S5. Quantitative neuropeptide comparison of different behavioral phenotypes of *Apis mellifera ligustica* workers.** "Protein Accession" is the unique number given to mark the entry of a protein in the database NCBIInr. "Peptide" is the amino acid sequence of the peptide. "Significance (-10lgP)" is the peptide confidence score. "NB" is nurse bee. "PF" is pollen forager. "NF" is nectar forager. "Group Profile (Ratio)" is the relative abundance ratio to the base group. "PTM" is post translational modification types present in the peptide.

| Protein                               | Protein Accession | Peptide                   | Significance | NB 1     | NB 2     | NB 3     | PF 1     | PF 2     | PF 3     | NB       | PF       | Group Profile (Ratio) | PTM                           |
|---------------------------------------|-------------------|---------------------------|--------------|----------|----------|----------|----------|----------|----------|----------|----------|-----------------------|-------------------------------|
| <b>PBAN-type neuropeptides (PBAN)</b> | <b>A8CL69.1</b>   | QITQFTPRLa                | 60           | 6.51E+06 | 6.29E+06 | 6.44E+06 | 4.23E+07 | 4.34E+07 | 4.42E+07 | 6.41E+06 | 4.33E+07 | 1.00 : 6.76           | Amidation                     |
|                                       |                   | TSQDITSGMWF<br>GPRLa      | 60           | 6.88E+08 | 6.55E+08 | 6.65E+08 | 1.88E+09 | 1.85E+09 | 1.95E+09 | 6.69E+08 | 1.89E+09 | 1.00 : 2.83           | Amidation                     |
|                                       |                   | MWFGPRLa                  | 27.89        | 2.04E+06 | 2.04E+06 | 2.15E+06 | 4.40E+05 | 4.64E+05 | 4.47E+05 | 2.08E+06 | 4.50E+05 | 1.00 : 0.22           | Amidation                     |
| <b>FMRamide</b>                       | <b>ACI90290.1</b> | TWKSPDIVIRFa              | 60           | 1.81E+07 | 1.85E+07 | 1.69E+07 | 4.27E+07 | 4.30E+07 | 4.18E+07 | 1.78E+07 | 4.25E+07 | 1.00 : 2.38           | Amidation                     |
|                                       |                   | GRNDLNFIRYa               | 42.6         | 2.94E+06 | 3.09E+06 | 3.11E+06 | 4.77E+06 | 4.84E+06 | 4.44E+06 | 3.05E+06 | 4.68E+06 | 1.00 : 1.54           | Amidation                     |
| <b>Myosuppressin</b>                  | <b>P85527.1</b>   | pQDVDHVFLRFa              | 30.88        | 1.33E+08 | 1.21E+08 | 1.28E+08 | 3.48E+08 | 3.65E+08 | 3.39E+08 | 1.27E+08 | 3.51E+08 | 1.00 : 2.75           | Pyro-glu from Q;<br>Amidation |
|                                       |                   | pQDVDHVFLR                | 60           | 1.23E+07 | 1.33E+07 | 1.39E+07 | 6.40E+06 | 6.49E+06 | 6.72E+06 | 1.32E+07 | 6.54E+06 | 1.00 : 0.5            | Pyro-glu from Q               |
| <b>Prohormone-3</b>                   | <b>P85828.1</b>   | SLKAPFA                   | 60           | 9.06E+06 | 9.13E+06 | 8.90E+06 | 1.88E+07 | 2.00E+07 | 2.06E+07 | 9.03E+06 | 1.98E+07 | 1.00 : 2.19           |                               |
| <b>Brian peptide</b>                  | <b>P85829.1</b>   | MVPVPVHHMA<br>DEL         | 60           | 6.94E+05 | 7.00E+05 | 6.87E+05 | 2.39E+06 | 2.46E+06 | 2.57E+06 | 6.94E+05 | 2.47E+06 | 1.00 : 3.57           |                               |
| <b>Diuretic hormone (DH)</b>          | <b>P85830.1</b>   | GLDLGLSRGFSG<br>SQAAKHLMa | 24.42        | 4.01E+08 | 4.26E+08 | 4.21E+08 | 8.49E+07 | 8.43E+07 | 8.29E+07 | 4.16E+08 | 8.40E+07 | 1.00 : 0.2            | Amidation                     |
| <b>Allatostatin (AST)</b>             | <b>Q06601.1</b>   | GRDYSFGLa                 | 53.26        | 8.32E+07 | 8.35E+07 | 8.56E+07 | 2.19E+08 | 2.46E+08 | 2.26E+08 | 8.41E+07 | 2.30E+08 | 1.00 : 2.74           | Amidation                     |
| <b>Apidaecins</b>                     | <b>Q06602.1</b>   | GNNRPVYIPQPR<br>PPHPRL    | 35.66        | 6.18E+09 | 6.04E+09 | 5.92E+09 | 3.37E+09 | 3.60E+09 | 3.47E+09 | 6.05E+09 | 3.48E+09 | 1.00 : 0.58           |                               |
| <b>Corazonin (CRZ)</b>                | <b>Q5DW47.1</b>   | pQTFTYSHGWT<br>Na         | 33.25        | 2.52E+06 | 2.65E+06 | 2.75E+06 | 7.79E+06 | 7.96E+06 | 8.01E+06 | 2.64E+06 | 7.92E+06 | 1.00 : 3              | Pyro-glu from Q;<br>Amidation |
| <b>Tachykinins (TK)</b>               | <b>Q868G6.1</b>   | ALMGFQGVRa                | 60           | 3.37E+08 | 3.66E+08 | 3.58E+08 | 1.47E+09 | 1.34E+09 | 1.32E+09 | 3.54E+08 | 1.38E+09 | 1.00 : 3.89           | Amidation                     |
|                                       |                   | APMGFQGMRa                | 60           | 3.60E+08 | 3.69E+08 | 3.80E+08 | 1.32E+09 | 1.24E+09 | 1.43E+09 | 3.70E+08 | 1.33E+09 | 1.00 : 3.6            | Amidation                     |
|                                       |                   | SPFRYLGARa                | 60           | 3.50E+07 | 3.75E+07 | 3.67E+07 | 1.21E+08 | 1.24E+08 | 1.15E+08 | 3.64E+07 | 1.20E+08 | 1.00 : 3.3            | Amidation                     |

|                                         |                          | ARMGFHGMRG             | 60                  | 5.23E+06    | 5.02E+06    | 5.11E+06    | 1.19E+07    | 1.23E+07    | 1.11E+07    | 5.12E+06  | 1.18E+07  | 1.00 : 2.3                   |                            |
|-----------------------------------------|--------------------------|------------------------|---------------------|-------------|-------------|-------------|-------------|-------------|-------------|-----------|-----------|------------------------------|----------------------------|
|                                         |                          | GVMDFQIGLQ             | 60                  | 5.17E+07    | 5.23E+07    | 5.19E+07    | 1.11E+08    | 1.28E+08    | 1.12E+08    | 5.20E+07  | 1.17E+08  | 1.00 : 2.25                  |                            |
|                                         |                          | ALMGFQGVVRG            | 26.66               | 8.62E+05    | 8.72E+05    | 8.56E+05    | 1.87E+06    | 1.75E+06    | 1.69E+06    | 8.63E+05  | 1.77E+06  | 1.00 : 2.05                  |                            |
|                                         |                          | IILDALEELD             | 60                  | 7.62E+06    | 7.96E+06    | 7.36E+06    | 4.66E+06    | 4.48E+06    | 4.39E+06    | 7.65E+06  | 4.51E+06  | 1.00 : 0.59                  |                            |
|                                         |                          | SPFRYLGA               | 60                  | 3.01E+07    | 3.26E+07    | 3.10E+07    | 8.63E+06    | 8.72E+06    | 8.88E+06    | 3.12E+07  | 8.74E+06  | 1.00 : 0.28                  |                            |
| <b>Neuropeptide like-1 (NPL1)</b>       | <b>XP_006559359.1</b>    | YVASLARTGDL PIRa       | 30.62               | 2.05E+07    | 2.18E+07    | 2.15E+07    | 3.39E+07    | 3.47E+07    | 3.55E+07    | 2.13E+07  | 3.47E+07  | 1.00 : 1.63                  | Amidation                  |
|                                         |                          | NVASLARTYTLP QNAa      | 60                  | 4.25E+07    | 4.23E+07    | 4.26E+07    | 2.11E+08    | 2.09E+08    | 2.12E+08    | 4.25E+07  | 2.11E+08  | 1.00 : 4.96                  | Amidation                  |
| <b>Pigment-dispersing hormone (PDH)</b> | <b>XP_006570344.1</b>    | LINSLLGLPKNM NNAa      | 60                  | 1.35E+07    | 1.49E+07    | 1.58E+07    | 2.85E+07    | 2.66E+07    | 2.98E+07    | 1.47E+07  | 2.83E+07  | 1.00 : 1.92                  | Amidation                  |
|                                         |                          |                        |                     |             |             |             |             |             |             |           |           |                              |                            |
|                                         |                          |                        |                     |             |             |             |             |             |             |           |           |                              |                            |
| <b>Protein</b>                          | <b>Protein Accession</b> | <b>Peptide</b>         | <b>Significance</b> | <b>NB 1</b> | <b>NB 2</b> | <b>NB 3</b> | <b>NF 1</b> | <b>NF 2</b> | <b>NF 3</b> | <b>NB</b> | <b>NF</b> | <b>Group Profile (Ratio)</b> | <b>PTM</b>                 |
| <b>Apidaecins</b>                       | <b>Q06602.1</b>          | GNNRPVYIPQPR PPHPRL    | 32.1                | 6.18E+09    | 6.04E+09    | 5.92E+09    | 3.15E+09    | 3.36E+09    | 3.31E+09    | 6.05E+09  | 3.27E+09  | 1.00 : 0.54                  |                            |
|                                         |                          | VYIPQRPHPRL            | 60                  | 1.33E+09    | 1.30E+09    | 1.23E+09    | 2.84E+08    | 2.70E+08    | 2.74E+08    | 1.29E+09  | 2.76E+08  | 1.00 : 0.21                  |                            |
| <b>Corazonin (CRZ)</b>                  | <b>Q5DW47.1</b>          | pQTFYSHGWT Na          | 53.03               | 2.52E+06    | 2.65E+06    | 2.75E+06    | 6.36E+06    | 6.55E+06    | 6.30E+06    | 2.64E+06  | 6.40E+06  | 1.00 : 2.43                  | Pyro-glu from Q; Amidation |
| <b>Diuretic hormone (DH)</b>            | <b>P85830.1</b>          | GLDLGLSRGFSG SQAAKHLMa | 60                  | 4.01E+08    | 4.26E+08    | 4.21E+08    | 1.41E+08    | 1.25E+08    | 1.39E+08    | 4.16E+08  | 1.35E+08  | 1.00 : 0.33                  | Amidation                  |
| <b>FMRFamide</b>                        | <b>AC190290.1</b>        | GRNDLNFIRYa            | 43.64               | 2.94E+06    | 3.09E+06    | 3.11E+06    | 4.86E+06    | 4.79E+06    | 4.65E+06    | 3.05E+06  | 4.68E+06  | 1.00 : 1.56                  | Amidation                  |
|                                         |                          | TWKSPDIVIRFa           | 60                  | 1.81E+07    | 1.85E+07    | 1.69E+07    | 7.71E+06    | 7.80E+06    | 7.68E+06    | 1.78E+07  | 7.73E+06  | 1.00 : 0.43                  | Amidation                  |
| <b>Myosuppressin</b>                    | <b>P85527.1</b>          | pQDVDHVFLRFa           | 36.72               | 1.33E+08    | 1.21E+08    | 1.28E+08    | 4.23E+08    | 4.37E+08    | 4.36E+08    | 1.27E+08  | 4.32E+08  | 1.00 : 3.39                  | Pyro-glu from Q; Amidation |
|                                         |                          | pQDVDHVFLR             | 60                  | 1.23E+07    | 1.33E+07    | 1.39E+07    | 4.15E+07    | 4.38E+07    | 4.21E+07    | 1.32E+07  | 4.25E+07  | 1.00 : 3.23                  | Pyro-glu from Q            |
| <b>Neuropeptide like-1 (NPL1)</b>       | <b>XP_006559359.1</b>    | YVASLARTGDL PIRa       | 60                  | 2.05E+07    | 2.18E+07    | 2.15E+07    | 4.49E+07    | 4.57E+07    | 4.39E+07    | 2.13E+07  | 4.48E+07  | 1.00 : 2.11                  | Amidation                  |
|                                         |                          | NVASLARTYTLP QNAa      | 60                  | 4.25E+07    | 4.23E+07    | 4.26E+07    | 8.16E+07    | 8.31E+07    | 8.37E+07    | 4.25E+07  | 8.28E+07  | 1.00 : 1.95                  | Amidation                  |
| <b>PBAN-type neuropeptides</b>          | <b>A8CL69.1</b>          | TSQDITSGMWF GPRLa      | 30.19               | 6.88E+08    | 6.55E+08    | 6.65E+08    | 1.04E+09    | 1.02E+09    | 9.98E+08    | 6.69E+08  | 1.02E+09  | 1.00 : 1.52                  | Amidation                  |

|                                         |                          |                                      |                     |             |             |             |             |             |             |           |           |                              |            |
|-----------------------------------------|--------------------------|--------------------------------------|---------------------|-------------|-------------|-------------|-------------|-------------|-------------|-----------|-----------|------------------------------|------------|
| <b>(PBAN)</b>                           |                          |                                      |                     |             |             |             |             |             |             |           |           |                              |            |
|                                         |                          | MWFGPRLa                             | 60                  | 2.04E+06    | 2.04E+06    | 2.15E+06    | 7.56E+05    | 7.59E+05    | 7.49E+05    | 2.08E+06  | 7.55E+05  | 1.00 : 0.36                  | Amidation  |
| <b>Pigment-dispersing hormone (PDH)</b> | <b>XP_006570344.1</b>    | LINSLGLPKNMNNAa                      | 60                  | 1.35E+07    | 1.49E+07    | 1.58E+07    | 2.78E+07    | 2.85E+07    | 2.66E+07    | 1.47E+07  | 2.76E+07  | 1.00 : 1.88                  | Amidation  |
| <b>Prohormone-3</b>                     | <b>P85828.1</b>          | ITGQGNRIF                            | 60                  | 8.78E+06    | 8.66E+06    | 8.67E+06    | 4.36E+07    | 4.27E+07    | 4.25E+07    | 8.70E+06  | 4.29E+07  | 1.00 : 4.93                  |            |
|                                         |                          | SLKAPFA                              | 38.97               | 9.06E+06    | 9.13E+06    | 8.90E+06    | 1.71E+07    | 1.68E+07    | 1.75E+07    | 9.03E+06  | 1.71E+07  | 1.00 : 1.9                   |            |
| <b>Tachykinins (TK)</b>                 | <b>Q868G6.1</b>          | ALMGFQGVRG                           | 60                  | 8.62E+05    | 8.72E+05    | 8.56E+05    | 4.27E+06    | 4.33E+06    | 4.47E+06    | 8.63E+05  | 4.36E+06  | 1.00 : 5.05                  |            |
|                                         |                          | ALMGFQGVRa                           | 30.19               | 3.37E+08    | 3.66E+08    | 3.58E+08    | 3.57E+09    | 3.63E+09    | 3.39E+09    | 3.54E+08  | 3.53E+09  | 1.00 : 9.98                  | Amidation  |
|                                         |                          | APMGFQGMRa                           | 60                  | 3.60E+08    | 3.69E+08    | 3.80E+08    | 3.38E+09    | 3.27E+09    | 3.59E+09    | 3.70E+08  | 3.41E+09  | 1.00 : 9.23                  | Amidation  |
|                                         |                          | ARMGFHGMRG                           | 60                  | 5.23E+06    | 5.02E+06    | 5.11E+06    | 1.26E+07    | 1.33E+07    | 1.21E+07    | 5.12E+06  | 1.28E+07  | 1.00 : 2.49                  |            |
|                                         |                          | IILDALEELD                           | 41.85               | 7.62E+06    | 7.96E+06    | 7.36E+06    | 2.13E+06    | 2.22E+06    | 2.30E+06    | 7.65E+06  | 2.22E+06  | 1.00 : 0.29                  |            |
|                                         |                          | SPFRYLGA                             | 31.06               | 3.01E+07    | 3.26E+07    | 3.10E+07    | 7.52E+06    | 7.72E+06    | 7.69E+06    | 3.12E+07  | 7.64E+06  | 1.00 : 0.24                  |            |
|                                         |                          |                                      |                     |             |             |             |             |             |             |           |           |                              |            |
|                                         |                          |                                      |                     |             |             |             |             |             |             |           |           |                              |            |
| <b>Protein</b>                          | <b>Protein Accession</b> | <b>Peptide</b>                       | <b>Significance</b> | <b>PF 1</b> | <b>PF 2</b> | <b>PF 3</b> | <b>NF 1</b> | <b>NF 2</b> | <b>NF 3</b> | <b>PF</b> | <b>NF</b> | <b>Group Profile (Ratio)</b> | <b>PTM</b> |
| <b>Allatostatin (AST)</b>               | <b>Q06601.1</b>          | AVHYSGGQPLG<br>SKRPNDMLSQR<br>YHFGLa | 30.34               | 4.90E+08    | 4.69E+08    | 4.98E+08    | 3.18E+08    | 3.25E+08    | 3.17E+08    | 4.86E+08  | 3.20E+08  | 1.00 : 0.66                  | Amidation  |
|                                         |                          | WIDTNDNKRGR<br>DYSFGLa               | 60                  | 4.38E+07    | 4.15E+07    | 4.29E+07    | 2.24E+07    | 2.52E+07    | 2.38E+07    | 4.27E+07  | 2.38E+07  | 1.00 : 0.56                  | Amidation  |
| <b>Brian peptide</b>                    | <b>P85829.1</b>          | MVPVPVHHMA<br>DELLRNGPDTVI           | 60                  | 9.95E+08    | 9.90E+08    | 1.04E+09    | 1.89E+09    | 1.98E+09    | 1.77E+09    | 1.01E+09  | 1.88E+09  | 1.00 : 1.86                  |            |
| <b>CAPA peptides-like</b>               | <b>XP_006559865.1</b>    | AFGLLTYPRla                          | 60                  | 2.88E+07    | 2.78E+07    | 2.63E+07    | 4.99E+07    | 4.66E+07    | 4.94E+07    | 2.76E+07  | 4.86E+07  | 1.00 : 1.76                  | Amidation  |
| <b>Diuretic hormone (DH)</b>            | <b>P85830.1</b>          | GLDLGLSRGFSG<br>SQAAKHLMa            | 60                  | 8.49E+07    | 8.43E+07    | 8.29E+07    | 1.41E+08    | 1.25E+08    | 1.39E+08    | 8.41E+07  | 1.35E+08  | 1.00 : 1.61                  | Amidation  |
| <b>FMRamide</b>                         | <b>AC190290.1</b>        | TWKSPDIVIRFa                         | 60                  | 4.27E+07    | 4.30E+07    | 4.18E+07    | 7.71E+06    | 7.80E+06    | 7.68E+06    | 4.25E+07  | 7.73E+06  | 1.00 : 0.18                  | Amidation  |
| <b>Neuropeptide like-1 (NPL1)</b>       | <b>XP_006559359.1</b>    | SVSSLARTGDLP<br>VREQ                 | 35.02               | 4.01E+07    | 4.21E+07    | 4.11E+07    | 2.52E+07    | 2.33E+07    | 2.38E+07    | 4.11E+07  | 2.41E+07  | 1.00 : 0.59                  |            |
|                                         |                          | NIASLMRDYDQ<br>SRENRVFPa             | 60                  | 3.00E+08    | 2.86E+08    | 2.98E+08    | 1.42E+08    | 1.47E+08    | 1.64E+08    | 2.95E+08  | 1.51E+08  | 1.00 : 0.51                  | Amidation  |
|                                         |                          | YVASLARTGDL                          | 27                  | 2.75E+08    | 2.92E+08    | 2.87E+08    | 6.32E+07    | 6.44E+07    | 6.27E+07    | 2.85E+08  | 6.34E+07  | 1.00 : 0.22                  |            |



|                                       |                       |              |       |          |          |          |          |          |          |          |          |             |                            |
|---------------------------------------|-----------------------|--------------|-------|----------|----------|----------|----------|----------|----------|----------|----------|-------------|----------------------------|
|                                       |                       | PIRGQ        |       |          |          |          |          |          |          |          |          |             |                            |
| <b>PBAN-type neuropeptides (PBAN)</b> | <b>A8CL69.1</b>       | QITQFTPRLa   | 60    | 4.23E+07 | 4.34E+07 | 4.42E+07 | 2.05E+07 | 2.24E+07 | 2.19E+07 | 4.33E+07 | 2.16E+07 | 1.00 : 0.5  | Amidation                  |
|                                       |                       | pQITQFTPRLa  | 33.65 | 3.50E+08 | 3.36E+08 | 3.38E+08 | 8.50E+07 | 8.36E+07 | 8.38E+07 | 3.41E+08 | 8.41E+07 | 1.00 : 0.25 | Pyro-glu from Q; Amidation |
| <b>Prohormone-1</b>                   | <b>P85798.1</b>       | LRNQLDIGDLQ  | 42.97 | 9.56E+08 | 9.48E+08 | 9.34E+08 | 4.52E+09 | 4.41E+09 | 4.45E+09 | 9.46E+08 | 4.46E+09 | 1.00 : 4.71 |                            |
| <b>Prohormone-4</b>                   | <b>P85831.1</b>       | IDLSRFYGFHNT | 60    | 6.46E+08 | 6.50E+08 | 6.36E+08 | 3.46E+09 | 3.50E+09 | 3.36E+09 | 6.44E+08 | 3.44E+09 | 1.00 : 5.34 |                            |
|                                       |                       | IDLSRFYGFHN  | 34.77 | 1.76E+08 | 1.64E+08 | 1.54E+08 | 3.77E+08 | 3.96E+08 | 3.66E+08 | 1.65E+08 | 3.80E+08 | 1.00 : 2.31 |                            |
| <b>Short neuropeptide F (sNPF)</b>    | <b>XP_006565207.1</b> | SDPHLSILS    | 33.58 | 1.93E+06 | 1.84E+06 | 1.93E+06 | 9.67E+05 | 9.50E+05 | 9.57E+05 | 1.90E+06 | 9.58E+05 | 1.00 : 0.5  |                            |
|                                       |                       | SPSLRLRFa    | 42.51 | 6.44E+06 | 6.16E+06 | 6.37E+06 | 1.11E+06 | 1.12E+06 | 1.33E+06 | 6.32E+06 | 1.19E+06 | 1.00 : 0.19 | Amidation                  |
| <b>Tachykinins (TK)</b>               | <b>Q868G6.1</b>       | APMGFQGMRG   | 60    | 5.44E+07 | 5.60E+07 | 5.56E+07 | 2.38E+08 | 2.47E+08 | 2.43E+08 | 5.53E+07 | 2.43E+08 | 1.00 : 4.39 |                            |
|                                       |                       | APMGFQGMRa   | 59.71 | 1.32E+09 | 1.24E+09 | 1.43E+09 | 3.38E+09 | 3.27E+09 | 3.59E+09 | 1.33E+09 | 3.41E+09 | 1.00 : 2.57 | Amidation                  |
|                                       |                       | ALMGFQGVRa   | 60    | 1.47E+09 | 1.34E+09 | 1.32E+09 | 3.57E+09 | 3.63E+09 | 3.39E+09 | 1.38E+09 | 3.53E+09 | 1.00 : 2.56 | Amidation                  |

**Table S6. Quantitative neuropeptide comparison of different behavioral phenotypes of *Apis cerana cerana* workers.** "Protein Accession" is the unique number given to mark the entry of a protein in the database NCBIInr. "Peptide" is the amino acid sequence of the peptide. "Significance (-10lgP)" is the peptide confidence score. "NB" is nurse bee. "PF" is pollen forager. "NF" is nectar forager. "Group Profile (Ratio)" is the relative abundance ratio to the base group. "PTM" is post translational modification types present in the peptide.

| Protein                     | Protein Accession | Peptide                           | Significance | NB 1     | NB 2     | NB 3     | PF 1     | PF 2     | PF 3     | NB       | PF          | Group Profile (Ratio) | PTM                           |
|-----------------------------|-------------------|-----------------------------------|--------------|----------|----------|----------|----------|----------|----------|----------|-------------|-----------------------|-------------------------------|
| Prohormone-3                | PBC27982.1        | SLKAPFA                           | 60           | 5.93E+07 | 5.68E+07 | 5.76E+07 | 1.40E+08 | 1.46E+08 | 1.44E+08 | 5.79E+07 | 1.43E+08    | 1.00 : 2.48           |                               |
|                             |                   | ITGQGNRIF                         | 60           | 2.20E+07 | 2.39E+07 | 2.38E+07 | 6.70E+07 | 6.54E+07 | 6.88E+07 | 2.32E+07 | 6.71E+07    | 1.00 : 2.89           |                               |
| Apidaecins                  | PBC28057.1        | GNNRPVYIPQPR<br>PPHPRL            | 60           | 4.98E+09 | 4.86E+09 | 5.07E+09 | 2.50E+09 | 2.59E+09 | 2.58E+09 | 4.97E+09 | 2.56E+09    | 1.00 : 0.51           |                               |
| Diuretic hormone (DH)       | PBC28214.1        | GLDLGLSRGFSG<br>SQAAKHLMa         | 39.87        | 4.60E+08 | 4.57E+08 | 4.22E+08 | 1.79E+09 | 1.91E+09 | 1.90E+09 | 4.46E+08 | 1.87E+09    | 1.00 : 4.18           | Amidation                     |
| Short neuropeptide F (sNPF) | PBC30406.1        | SDPHLSIGILSKPI<br>SAIPSSKFDD      | 60           | 3.73E+08 | 3.94E+08 | 3.79E+08 | 1.46E+08 | 1.60E+08 | 1.57E+08 | 3.82E+08 | 1.54E+08    | 1.00 : 0.4            |                               |
| Corazonin (CRZ)             | PBC31004.1        | pQMFTYSHGWT<br>Na                 | 28.91        | 9.94E+07 | 9.45E+07 | 9.63E+07 | 3.79E+08 | 3.73E+08 | 3.71E+08 | 9.67E+07 | 3.74E+08    | 1.00 : 3.87           | Pyro-glu from Q;<br>Amidation |
| SIFamide                    | PBC31251.1        | KPPFNGSIFa                        | 60           | 1.97E+08 | 1.84E+08 | 1.81E+08 | 8.11E+07 | 9.40E+07 | 9.48E+07 | 1.87E+08 | 9.00E+07    | 1.00 : 0.48           | Amidation                     |
|                             |                   | AYRKPPFNGSIFa                     | 60           | 1.68E+09 | 1.55E+09 | 1.64E+09 | 4.56E+08 | 4.76E+08 | 4.75E+08 | 1.62E+09 | 4.69E+08    | 1.00 : 0.29           | Amidation                     |
| Tachykinins (TK)            | PBC31431.1        | ASFDDEYY                          | 56.6         | 6.50E+06 | 6.08E+06 | 6.11E+06 | 3.49E+07 | 3.10E+07 | 3.38E+07 | 6.23E+06 | 3.32E+07    | 1.00 : 5.33           |                               |
|                             |                   | APMGFQGMRa                        | 60           | 9.27E+08 | 9.24E+08 | 9.17E+08 | 4.58E+09 | 4.73E+09 | 4.55E+09 | 9.23E+08 | 4.62E+09    | 1.00 : 5.01           | Amidation                     |
|                             |                   | APMGFYGTRG                        | 60           | 7.36E+06 | 7.35E+06 | 7.19E+06 | 3.19E+07 | 3.83E+07 | 3.85E+07 | 7.30E+06 | 3.62E+07    | 1.00 : 4.96           |                               |
|                             |                   | APMGFQGMRG                        | 40.07        | 9.10E+06 | 9.29E+06 | 9.11E+06 | 4.22E+07 | 4.19E+07 | 4.36E+07 | 9.17E+06 | 4.26E+07    | 1.00 : 4.64           |                               |
|                             |                   | ALMGFQGVRa                        | 60           | 8.14E+08 | 8.19E+08 | 8.28E+08 | 3.87E+09 | 3.66E+09 | 3.89E+09 | 8.20E+08 | 3.81E+09    | 1.00 : 4.64           | Amidation                     |
|                             |                   | APVGYQEMQGK<br>KNSASLNSENFG<br>IF | 55.82        | 4.61E+07 | 4.43E+07 | 4.48E+07 | 1.85E+08 | 1.83E+08 | 1.82E+08 | 4.51E+07 | 1.83E+08    | 1.00 : 4.07           |                               |
|                             | ARMGFHGMRG        | 41.94                             | 1.29E+07     | 1.40E+07 | 1.42E+07 | 4.16E+07 | 4.24E+07 | 4.17E+07 | 1.37E+07 | 4.19E+07 | 1.00 : 3.06 |                       |                               |
|                             | SPFRYLGV          | 60                                | 5.53E+07     | 5.86E+07 | 5.75E+07 | 1.45E+08 | 1.64E+08 | 1.61E+08 | 5.71E+07 | 1.57E+08 | 1.00 : 2.74 |                       |                               |
|                             | ALMGFQGVRG        | 37.82                             | 1.98E+06     | 2.09E+06 | 1.92E+06 | 3.64E+06 | 3.64E+06 | 3.91E+06 | 2.00E+06 | 3.73E+06 | 1.00 : 1.87 |                       |                               |

|                                         |                          |                           |                     |             |             |             |             |             |             |           |           |                              |                               |
|-----------------------------------------|--------------------------|---------------------------|---------------------|-------------|-------------|-------------|-------------|-------------|-------------|-----------|-----------|------------------------------|-------------------------------|
| <b>Prohormone-2</b>                     | PBC32727.1               | NVPIYQEPRF                | 46.37               | 9.22E+08    | 9.28E+08    | 9.43E+08    | 3.25E+08    | 3.72E+08    | 3.88E+08    | 9.31E+08  | 3.62E+08  | 1.00 : 0.39                  |                               |
|                                         |                          | LPTNLGEDTKKT<br>EQTMRPKS  | 60                  | 5.12E+08    | 5.16E+08    | 5.02E+08    | 1.44E+08    | 1.56E+08    | 1.47E+08    | 5.10E+08  | 1.49E+08  | 1.00 : 0.29                  |                               |
|                                         |                          | VPIYQEPRF                 | 33.21               | 9.74E+07    | 9.61E+07    | 9.48E+07    | 2.38E+07    | 2.16E+07    | 2.06E+07    | 9.61E+07  | 2.20E+07  | 1.00 : 0.23                  |                               |
| <b>Neuropeptide like-1 (NPL1)</b>       | PBC32914.1               | SISSLARTGDLF<br>VREQ      | 30.75               | 3.69E+08    | 3.39E+08    | 3.46E+08    | 1.38E+09    | 1.33E+09    | 1.46E+09    | 3.51E+08  | 1.39E+09  | 1.00 : 3.96                  |                               |
|                                         |                          | NVGSVAREHGL<br>PYa        | 60                  | 6.26E+08    | 6.78E+08    | 6.89E+08    | 2.21E+09    | 2.73E+09    | 2.22E+09    | 6.64E+08  | 2.39E+09  | 1.00 : 3.59                  | Amidation                     |
|                                         |                          | NVGTLARDFAL<br>PPa        | 36.07               | 5.22E+07    | 5.05E+07    | 5.14E+07    | 1.31E+08    | 1.52E+08    | 1.21E+08    | 5.14E+07  | 1.35E+08  | 1.00 : 2.62                  | Amidation                     |
| <b>Pigment-dispersing hormone (PDH)</b> | PBC32545.1               | NSELINSLGLP<br>KNMNNa     | 23.88               | 7.62E+07    | 7.93E+07    | 7.72E+07    | 2.76E+08    | 2.75E+08    | 2.46E+08    | 7.76E+07  | 2.66E+08  | 1.00 : 3.43                  | Amidation                     |
| <b>PBAN-type neuropeptides (PBAN)</b>   | PBC32274.1               | pQITQFTPRLa               | 33.45               | 2.79E+07    | 2.85E+07    | 2.58E+07    | 1.59E+08    | 1.71E+08    | 1.55E+08    | 2.74E+07  | 1.62E+08  | 1.00 : 5.9                   | Pyro-glu from Q;<br>Amidation |
| <b>Orcokinin (ORC)</b>                  | XP_01690860<br>8.1       | NLDEIDRVGWS<br>GFV        | 42.33               | 2.22E+08    | 2.48E+08    | 2.52E+08    | 6.87E+08    | 6.87E+08    | 6.53E+08    | 2.41E+08  | 6.76E+08  | 1.00 : 2.81                  |                               |
| <b>Prohormone-4</b>                     | PBC32608.1               | IDLRFYGHFNT               | 30.72               | 9.52E+08    | 9.58E+08    | 9.13E+08    | 3.06E+09    | 3.12E+09    | 3.03E+09    | 9.41E+08  | 3.07E+09  | 1.00 : 3.26                  |                               |
|                                         |                          |                           |                     |             |             |             |             |             |             |           |           |                              |                               |
|                                         |                          |                           |                     |             |             |             |             |             |             |           |           |                              |                               |
| <b>Protein</b>                          | <b>Protein Accession</b> | <b>Peptide</b>            | <b>Significance</b> | <b>NB 1</b> | <b>NB 2</b> | <b>NB 3</b> | <b>NF 1</b> | <b>NF 2</b> | <b>NF 3</b> | <b>NB</b> | <b>NF</b> | <b>Group Profile (Ratio)</b> | <b>PTM</b>                    |
| <b>Prohormone-3</b>                     | PBC27982.1               | SLKAPFA                   | 60                  | 5.93E+07    | 5.68E+07    | 5.76E+07    | 1.75E+08    | 1.62E+08    | 1.77E+08    | 5.79E+07  | 1.71E+08  | 1.00 : 2.96                  |                               |
| <b>Apidaecins</b>                       | PBC28057.1               | GNNRPVYIPQPR<br>PPHPRL    | 35.67               | 4.98E+09    | 4.86E+09    | 5.07E+09    | 1.89E+09    | 1.92E+09    | 1.98E+09    | 4.97E+09  | 1.93E+09  | 1.00 : 0.39                  |                               |
| <b>Diuretic hormone (DH)</b>            | PBC28214.1               | GLDLGLSRGFSG<br>SQAAKHLMa | 60                  | 4.60E+08    | 4.57E+08    | 4.22E+08    | 2.39E+09    | 2.40E+09    | 2.51E+09    | 4.46E+08  | 2.43E+09  | 1.00 : 5.45                  | Amidation                     |
| <b>Short neuropeptide F (sNPF)</b>      | PBC30406.1               | SPSLRLRFa                 | 60                  | 3.86E+07    | 3.68E+07    | 3.63E+07    | 5.84E+06    | 5.43E+06    | 5.37E+06    | 3.72E+07  | 5.55E+06  | 1.00 : 0.15                  | Amidation                     |
| <b>Corazonin (CRZ)</b>                  | PBC31004.1               | pQMFTYSHGWT<br>Na         | 48.07               | 9.94E+07    | 9.45E+07    | 9.63E+07    | 4.49E+08    | 4.58E+08    | 4.78E+08    | 9.67E+07  | 4.62E+08  | 1.00 : 4.77                  | Amidation                     |
| <b>SIFamide</b>                         | PBC31251.1               | KPPFNGSIFa                | 60                  | 1.97E+08    | 1.84E+08    | 1.81E+08    | 6.87E+07    | 6.79E+07    | 6.70E+07    | 1.87E+08  | 6.79E+07  | 1.00 : 0.36                  | Amidation                     |
|                                         |                          | AYRKPPFNGSIFa             | 60                  | 1.68E+09    | 1.55E+09    | 1.64E+09    | 3.26E+08    | 3.14E+08    | 3.06E+08    | 1.62E+09  | 3.15E+08  | 1.00 : 0.19                  | Amidation                     |
| <b>Tachykinins (TK)</b>                 | PBC31431.1               | ALMGFQGVRa                | 60                  | 8.14E+08    | 8.19E+08    | 8.28E+08    | 9.80E+09    | 9.58E+09    | 9.57E+09    | 8.20E+08  | 9.65E+09  | 1.00 : 11.76                 | Amidation                     |
|                                         |                          | APMGFQGMRa                | 60                  | 9.27E+08    | 9.24E+08    | 9.17E+08    | 9.93E+09    | 1.02E+10    | 9.93E+09    | 9.23E+08  | 1.00E+10  | 1.00 : 10.86                 | Amidation                     |

|                                         |                          |                                   |                     |             |             |             |             |             |             |           |           |                              |            |
|-----------------------------------------|--------------------------|-----------------------------------|---------------------|-------------|-------------|-------------|-------------|-------------|-------------|-----------|-----------|------------------------------|------------|
|                                         |                          | APMGFQGMRG                        | 56.21               | 9.10E+06    | 9.29E+06    | 9.11E+06    | 8.10E+07    | 7.91E+07    | 7.86E+07    | 9.17E+06  | 7.96E+07  | 1.00 : 8.68                  |            |
|                                         |                          | ASFDDEYY                          | 39.72               | 6.50E+06    | 6.08E+06    | 6.11E+06    | 4.46E+07    | 4.32E+07    | 4.21E+07    | 6.23E+06  | 4.33E+07  | 1.00 : 6.95                  |            |
|                                         |                          | APMGFYGTRG                        | 60                  | 7.36E+06    | 7.35E+06    | 7.19E+06    | 4.62E+07    | 4.58E+07    | 4.99E+07    | 7.30E+06  | 4.73E+07  | 1.00 : 6.48                  |            |
|                                         |                          | ALMGFQGVVRG                       | 60                  | 1.98E+06    | 2.09E+06    | 1.92E+06    | 1.07E+07    | 1.21E+07    | 1.23E+07    | 2.00E+06  | 1.17E+07  | 1.00 : 5.86                  |            |
|                                         |                          | APVGYQEMQGK<br>KNSASLNSENFG<br>IF | 35.68               | 4.61E+07    | 4.43E+07    | 4.48E+07    | 1.86E+08    | 1.82E+08    | 1.92E+08    | 4.51E+07  | 1.87E+08  | 1.00 : 4.14                  |            |
|                                         |                          | ARMGFHGMRG                        | 28.15               | 1.29E+07    | 1.40E+07    | 1.42E+07    | 5.47E+07    | 5.44E+07    | 5.44E+07    | 1.37E+07  | 5.45E+07  | 1.00 : 3.98                  |            |
| <b>Prohormone-2</b>                     | PBC32727.1               | VPIYQEPRF                         | 25.35               | 9.74E+07    | 9.51E+07    | 9.48E+07    | 3.12E+07    | 3.29E+07    | 3.30E+07    | 9.58E+07  | 3.24E+07  | 1.00 : 0.34                  |            |
|                                         |                          | NVPIYQEPRF                        | 60                  | 9.22E+08    | 9.28E+08    | 9.43E+08    | 2.88E+08    | 3.15E+08    | 3.00E+08    | 9.31E+08  | 3.01E+08  | 1.00 : 0.32                  |            |
| <b>Neuropeptide like-1 (NPL1)</b>       | PBC32914.1               | YVASLARTGDL<br>PIRa               | 60                  | 6.26E+08    | 6.78E+08    | 6.89E+08    | 3.17E+09    | 3.41E+09    | 3.20E+09    | 6.64E+08  | 3.26E+09  | 1.00 : 4.91                  | Amidation  |
|                                         |                          | NVGSVAREHGL<br>PYa                | 36.43               | 3.69E+08    | 3.39E+08    | 3.46E+08    | 1.45E+09    | 1.40E+09    | 1.50E+09    | 3.51E+08  | 1.45E+09  | 1.00 : 4.13                  | Amidation  |
|                                         |                          | SISSLARTGDLP<br>VREQ              | 60                  | 5.22E+07    | 5.05E+07    | 5.14E+07    | 1.53E+08    | 1.55E+08    | 1.42E+08    | 5.14E+07  | 1.50E+08  | 1.00 : 2.92                  |            |
| <b>Pigment-dispersing hormone (PDH)</b> | PBC32545.1               | NSELINLLGLP<br>KNMNNa             | 60                  | 7.62E+07    | 7.93E+07    | 7.72E+07    | 3.02E+08    | 3.19E+08    | 3.18E+08    | 7.76E+07  | 3.13E+08  | 1.00 : 4.04                  | Amidation  |
| <b>PBAN-type neuropeptides (PBAN)</b>   | PBC32274.1               | TSQDITSGMWF<br>GPRLa              | 36.94               | 8.63E+07    | 8.83E+07    | 8.45E+07    | 2.38E+08    | 2.50E+08    | 2.47E+08    | 8.64E+07  | 2.45E+08  | 1.00 : 2.84                  | Amidation  |
| <b>Orcokinin (ORC)</b>                  | XP_01690860<br>8.1       | LTNYLATGHRT<br>NGGPVI             | 43.31               | 4.29E+08    | 4.11E+08    | 4.24E+08    | 2.17E+09    | 2.13E+09    | 2.19E+09    | 4.21E+08  | 2.16E+09  | 1.00 : 5.13                  |            |
|                                         |                          | NLDEIDRVGWS<br>GFV                | 60                  | 2.22E+08    | 2.48E+08    | 2.52E+08    | 9.30E+08    | 9.49E+08    | 9.42E+08    | 2.41E+08  | 9.40E+08  | 1.00 : 3.91                  |            |
| <b>Prohormone-4</b>                     | PBC32608.1               | IDLSRFYGHFNT                      | 25.79               | 9.52E+08    | 9.58E+08    | 9.13E+08    | 6.23E+09    | 6.19E+09    | 6.34E+09    | 9.41E+08  | 6.25E+09  | 1.00 : 6.65                  |            |
|                                         |                          |                                   |                     |             |             |             |             |             |             |           |           |                              |            |
|                                         |                          |                                   |                     |             |             |             |             |             |             |           |           |                              |            |
|                                         |                          |                                   |                     |             |             |             |             |             |             |           |           |                              |            |
| <b>Protein</b>                          | <b>Protein Accession</b> | <b>Peptide</b>                    | <b>Significance</b> | <b>PF 1</b> | <b>PF 2</b> | <b>PF 3</b> | <b>NF 1</b> | <b>NF 2</b> | <b>NF 3</b> | <b>PF</b> | <b>NF</b> | <b>Group Profile (Ratio)</b> | <b>PTM</b> |
| <b>Short neuropeptide F (sNPF)</b>      | PBC30406.1               | SPSLRLRFa                         | 60                  | 1.37E+07    | 1.59E+07    | 1.46E+07    | 5.84E+06    | 5.43E+06    | 5.37E+06    | 1.47E+07  | 5.55E+06  | 1.00 : 0.38                  | Amidation  |
|                                         |                          | SQRSPSLRLRFa                      | 43.9                | 4.30E+07    | 4.03E+07    | 4.33E+07    | 1.12E+07    | 1.11E+07    | 1.20E+07    | 4.22E+07  | 1.14E+07  | 1.00 : 0.27                  | Amidation  |

|                                       |                    |                                      |       |          |          |          |          |          |          |          |          |             |                               |
|---------------------------------------|--------------------|--------------------------------------|-------|----------|----------|----------|----------|----------|----------|----------|----------|-------------|-------------------------------|
| <b>Tachykinins (TK)</b>               | PBC31431.1         | ALMGFQGVVRG                          | 51.11 | 3.64E+06 | 3.64E+06 | 3.91E+06 | 1.07E+07 | 1.21E+07 | 1.23E+07 | 3.73E+06 | 1.17E+07 | 1.00 : 3.14 |                               |
|                                       |                    | ALMGFQGVVRa                          | 60    | 3.87E+09 | 3.66E+09 | 3.89E+09 | 9.80E+09 | 9.58E+09 | 9.57E+09 | 3.81E+09 | 9.65E+09 | 1.00 : 2.54 | Amidation                     |
|                                       |                    | APMGFQGMRa                           | 60    | 4.58E+09 | 4.63E+09 | 4.55E+09 | 9.93E+09 | 1.02E+10 | 9.93E+09 | 4.59E+09 | 1.00E+10 | 1.00 : 2.18 | Amidation                     |
|                                       |                    | APMGFQGMRG                           | 47.56 | 4.22E+07 | 4.19E+07 | 4.36E+07 | 8.10E+07 | 7.91E+07 | 7.86E+07 | 4.26E+07 | 7.96E+07 | 1.00 : 1.87 |                               |
| <b>PBAN-type neuropeptides (PBAN)</b> | PBC32274.1         | pQLHNIIDKPRQ<br>NFNDPRF              | 60    | 6.45E+07 | 6.61E+07 | 6.72E+07 | 1.56E+07 | 1.61E+07 | 1.74E+07 | 6.59E+07 | 1.64E+07 | 1.00 : 0.25 | Pyro-glu from Q               |
|                                       |                    | pQITQFTPRLa                          | 26.86 | 1.59E+08 | 1.71E+08 | 1.55E+08 | 4.20E+07 | 4.55E+07 | 4.41E+07 | 1.62E+08 | 4.39E+07 | 1.00 : 0.27 | Pyro-glu from Q;<br>Amidation |
|                                       |                    | pQLHNIIDKPRQ<br>NFNDP                | 34.07 | 6.24E+06 | 6.13E+06 | 6.39E+06 | 2.29E+06 | 2.13E+06 | 2.01E+06 | 6.25E+06 | 2.14E+06 | 1.00 : 0.34 | Pyro-glu from Q               |
| <b>Prohormone-4</b>                   | PBC32608.1         | IDLSRFYGHFN                          | 49.52 | 2.50E+09 | 2.51E+09 | 2.49E+09 | 5.28E+09 | 5.29E+09 | 5.21E+09 | 2.50E+09 | 5.26E+09 | 1.00 : 2.1  |                               |
|                                       |                    | IDLSRFYGHFNT                         | 60    | 3.06E+09 | 3.12E+09 | 3.03E+09 | 6.23E+09 | 6.19E+09 | 6.34E+09 | 3.07E+09 | 6.25E+09 | 1.00 : 2.04 |                               |
| <b>Neuropeptide like-1 (NPL1)</b>     | PBC32914.1         | SISSLARTGDLP<br>VREQ                 | 56.01 | 1.38E+09 | 1.33E+09 | 1.46E+09 | 1.53E+08 | 1.55E+08 | 1.42E+08 | 1.39E+09 | 1.50E+08 | 1.00 : 0.11 |                               |
|                                       |                    | NIASLIRDYDQS<br>RENRVSFpa            | 39.6  | 1.40E+08 | 1.59E+08 | 1.34E+08 | 2.99E+08 | 2.86E+08 | 3.03E+08 | 1.44E+08 | 2.96E+08 | 1.00 : 2.05 | Amidation                     |
|                                       |                    | YVASLARTGDL<br>PIRGQ                 | 30.32 | 3.13E+08 | 3.00E+08 | 3.05E+08 | 1.50E+08 | 1.56E+08 | 1.58E+08 | 3.06E+08 | 1.55E+08 | 1.00 : 0.5  |                               |
| <b>Allatostatin (AST)</b>             | PBC34787.1         | AVHYSGGQPLG<br>SKRPNDMLSQR<br>YHFGLa | 60    | 8.06E+08 | 7.84E+08 | 7.90E+08 | 5.10E+08 | 5.17E+08 | 5.00E+08 | 7.93E+08 | 5.09E+08 | 1.00 : 0.64 | Amidation                     |
|                                       |                    | WIDTNDNKRGR<br>DYSFGLa               | 28.34 | 7.12E+07 | 7.11E+07 | 7.06E+07 | 4.35E+07 | 4.19E+07 | 4.22E+07 | 7.10E+07 | 4.25E+07 | 1.00 : 0.6  | Amidation                     |
| <b>Brain peptide</b>                  | XP_01690897<br>0   | MVPVPVHHMA<br>DELLRSGPDTVI           | 60    | 5.20E+08 | 4.91E+08 | 4.94E+08 | 9.09E+08 | 9.84E+08 | 9.14E+08 | 5.02E+08 | 9.36E+08 | 1.00 : 1.87 |                               |
| <b>FMRFamide</b>                      | XP_01692093<br>2.1 | TWKSPDIVIRFa                         | 60    | 1.94E+07 | 2.20E+07 | 2.10E+07 | 3.86E+07 | 3.92E+07 | 4.09E+07 | 2.08E+07 | 3.96E+07 | 1.00 : 1.9  | Amidation                     |

**Table S7. Quantitative neuropeptide comparison between *Apis cerana cerana* and *Apis mellifera ligustica*. "NB" is nurse bee. "PF" is pollen forager. "NF" is nectar forager. "Peptide" is the amino acid sequence of the peptide. "Significance (-10lgP)" is the peptide confidence score. "Group Profile (Ratio)" is the relative abundance ratio to the base group. "PTM" is post translational modification types present in the peptide.**

| Protein                       | Peptide                      | Significance | ACC-NB 1 | ACC-NB 2 | ACC-NB 3 | AML-NB 1 | AML-NB 2 | AML-NB 3 | ACC-NB    | AML-NB   | Group Profile (Ratio) | PTM                        |
|-------------------------------|------------------------------|--------------|----------|----------|----------|----------|----------|----------|-----------|----------|-----------------------|----------------------------|
| Allatostatin (AST)            | AYTYVSEYKRLPVYNGIa           | 60           | 3.41E+08 | 3.10E+08 | 3.21E+08 | 1.09E+08 | 1.07E+08 | 1.11E+08 | 3.24E+08  | 1.09E+08 | 1.00 : 0.34           | Amidation                  |
| Diuretic hormone (DH)         | GLDLGLSRGFGSGSQAa            | 36.51        | 1.22E+06 | 1.11E+06 | 1.08E+06 | 3.24E+06 | 3.37E+06 | 3.08E+06 | 1.14E+06  | 3.23E+06 | 1.00 : 2.84           |                            |
|                               | GLDLGLSRGFGSGSQAAKHLMa       | 60           | 2.39E+08 | 2.20E+08 | 2.27E+08 | 4.01E+08 | 4.26E+08 | 4.21E+08 | 2.29E+08  | 4.16E+08 | 1.00 : 1.82           | Amidation                  |
| SIFamide                      | YRKPPFNGSIFa                 | 60           | 4.54E+07 | 4.35E+07 | 4.46E+07 | 1.22E+08 | 1.17E+08 | 1.15E+08 | 4.45E+07  | 1.18E+08 | 1.00 : 2.65           | Amidation                  |
|                               | KPPFNGSIFa                   | 35.18        | 1.97E+08 | 1.84E+08 | 1.81E+08 | 3.97E+08 | 4.10E+08 | 3.83E+08 | 1.87E+08  | 3.97E+08 | 1.00 : 2.12           | Amidation                  |
| Myosuppressin                 | pQDVDHVFLRFa                 | 49.38        | 6.80E+07 | 6.50E+07 | 6.67E+07 | 1.33E+08 | 1.21E+08 | 1.28E+08 | 6.66E+07  | 1.27E+08 | 1.00 : 1.91           | Pyro-glu from Q; Amidation |
| PBAN-type neuropeptide (PBAN) | GMWFGPRLa                    | 60           | 7.02E+06 | 6.96E+06 | 6.87E+06 | 1.53E+07 | 1.37E+07 | 1.43E+07 | 6.95E+06  | 1.44E+07 | 1.00 : 2.08           | Amidation                  |
| Prohormone-2                  | SQAYDPYSNAAQFLSSQSRGYP YQHRL | 60           | 4.18E+07 | 4.36E+07 | 4.23E+07 | 1.24E+08 | 1.19E+08 | 1.08E+08 | 4.26E+07  | 1.17E+08 | 1.00 : 2.75           |                            |
| Prohormone-4                  | IDLSRFYGHF                   | 41.13        | 2.19E+08 | 2.21E+08 | 2.01E+08 | 7.73E+08 | 7.77E+08 | 7.53E+08 | 2.14E+08  | 7.68E+08 | 1.00 : 3.59           |                            |
|                               | DLSRFYGHF                    | 52.14        | 1.52E+07 | 1.57E+07 | 1.43E+07 | 3.30E+06 | 3.76E+06 | 3.32E+06 | 1.51E+07  | 3.46E+06 | 1.00 : 0.23           |                            |
| Tachykinins (TK)              | ALMGFQGV RG                  | 33.23        | 1.98E+06 | 2.09E+06 | 1.92E+06 | 8.62E+05 | 8.72E+05 | 8.56E+05 | 2.00E+06  | 8.63E+05 | 1.00 : 0.43           |                            |
|                               | ALMGFQGV Ra                  | 60           | 8.14E+08 | 8.19E+08 | 8.28E+08 | 3.37E+08 | 3.66E+08 | 3.58E+08 | 8.20E+08  | 3.54E+08 | 1.00 : 0.43           | Amidation                  |
|                               | APMGFQGM Ra                  | 60           | 9.27E+08 | 9.24E+08 | 9.17E+08 | 3.60E+08 | 3.69E+08 | 3.80E+08 | 9.23E+08  | 3.70E+08 | 1.00 : 0.4            | Amidation                  |
|                               | APMGFQGM RG                  | 60           | 9.10E+06 | 9.29E+06 | 9.11E+06 | 3.36E+06 | 3.19E+06 | 3.23E+06 | 9.17E+06  | 3.26E+06 | 1.00 : 0.36           |                            |
|                               |                              |              |          |          |          |          |          |          |           |          |                       |                            |
|                               |                              |              |          |          |          |          |          |          |           |          |                       |                            |
| Protein                       | Peptide                      | Significance | ACC-PF1  | ACC-PF2  | ACC-PF3  | AML-PF1  | AML-PF2  | AML-PF3  | ACC-PF    | AML-PF   | Group Profile (Ratio) | PTM                        |
| Apidaecins                    | GNNRPVYIPQPRPPHRL            | 60           | 1.38E+09 | 1.50E+09 | 1.46E+09 | 3.37E+09 | 3.60E+09 | 3.47E+09 | 1.447E+09 | 3.48E+09 | 1.00 : 2.41           |                            |

|                                              |                             |                     |                |                |                |                |                |                |               |               |                              |                            |
|----------------------------------------------|-----------------------------|---------------------|----------------|----------------|----------------|----------------|----------------|----------------|---------------|---------------|------------------------------|----------------------------|
| <b>Callisulfakinin</b>                       | pQQFDDYGHLRFa               | 60                  | 6.46E+06       | 6.42E+06       | 6.39E+06       | 4.16E+06       | 4.32E+06       | 4.14E+06       | 6423333.3     | 4206667       | 1.00 : 0.65                  | Pyro-glu from Q; Amidation |
| <b>FMRFamide-related peptides-like</b>       | GRNDLNFIRYa                 | 60                  | 1.66E+07       | 1.45E+07       | 1.48E+07       | 4.77E+06       | 4.84E+06       | 4.44E+06       | 15300000      | 4683333       | 1.00 : 0.31                  | Amidation                  |
| <b>Neuropeptide like precursor 1 (NPLP1)</b> | NVGSVAREHGLPYa              | 60                  | 2.21E+09       | 2.73E+09       | 2.22E+09       | 6.84E+09       | 6.84E+09       | 6.87E+09       | 2.39E+09      | 6.85E+09      | 1.00 : 2.87                  | Amidation                  |
|                                              | YVASLARTGDLPIRa             | 60                  | 1.73E+07       | 1.77E+07       | 1.81E+07       | 3.39E+07       | 3.47E+07       | 3.55E+07       | 1.77E+07      | 47500000      | 1.00 : 1.96                  | Amidation                  |
| <b>PBAN-type neuropeptide (PBAN)</b>         | RVPWTPSRLa                  | 60                  | 7.45E+06       | 7.17E+06       | 7.21E+06       | 2.62E+07       | 2.50E+07       | 2.37E+07       | 7276666.7     | 24967000      | 1.00 : 3.43                  | Amidation                  |
|                                              | GMWFGPRLa                   | 31.51               | 3.25E+06       | 3.45E+06       | 3.52E+06       | 7.93E+06       | 7.83E+06       | 8.00E+06       | 3406666.7     | 7920333       | 1.00 : 2.32                  |                            |
| <b>Prohormone-1</b>                          | LRNQLDIGDLQ                 | 60                  | 4.46E+08       | 4.18E+08       | 4.51E+08       | 9.56E+08       | 9.48E+08       | 9.34E+08       | 43833333.3    | 9.46E+08      | 1.00 : 2.16                  |                            |
| <b>Prohormone-4</b>                          | IDLSRFYGHF                  | 43.86               | 1.95E+08       | 1.88E+08       | 1.72E+08       | 2.94E+08       | 3.07E+08       | 2.88E+08       | 18500000.0    | 2.96E+08      | 1.00 : 1.6                   |                            |
| <b>Tachykinins (TK)</b>                      | ALMGFQGVRa                  | 60                  | 3.87E+09       | 3.66E+09       | 3.89E+09       | 1.47E+09       | 1.34E+09       | 1.32E+09       | 3.807E+09     | 1.38E+09      | 1.00 : 0.36                  | Amidation                  |
|                                              | APMGFQGMRa                  | 60                  | 4.58E+09       | 4.63E+09       | 4.55E+09       | 1.32E+09       | 1.24E+09       | 1.43E+09       | 4.587E+09     | 1.33E+09      | 1.00 : 0.29                  | Amidation                  |
|                                              | ASFDDEYY                    | 60                  | 3.49E+07       | 3.10E+07       | 3.38E+07       | 4.73E+06       | 4.93E+06       | 4.80E+06       | 3.32E+07      | 4.82E+06      | 1.00 : 0.14                  |                            |
|                                              |                             |                     |                |                |                |                |                |                |               |               |                              |                            |
|                                              |                             |                     |                |                |                |                |                |                |               |               |                              |                            |
| <b>Protein</b>                               | <b>Peptide</b>              | <b>Significance</b> | <b>ACC-NF1</b> | <b>ACC-NF2</b> | <b>ACC-NF3</b> | <b>AML-NF1</b> | <b>AML-NF2</b> | <b>AML-NF3</b> | <b>ACC-NF</b> | <b>AML-NF</b> | <b>Group Profile (Ratio)</b> | <b>PTM</b>                 |
| <b>Diuretic hormone (DH)</b>                 | LVDHRIPDLENEMFDSGNDPGSTVVRT | 31.21               | 2.54E+06       | 2.31E+06       | 2.51E+06       | 7.87E+06       | 7.99E+06       | 8.03E+06       | 2.45E+06      | 7.96E+06      | 1.00 : 3.25                  |                            |
| <b>Neuropeptide like precursor 1 (NPLP1)</b> | SVSSLAKNSAWPVSL             | 60                  | 1.53E+08       | 1.55E+08       | 1.42E+08       | 2.62E+08       | 2.76E+08       | 2.89E+08       | 1.50E+08      | 2.76E+08      | 1.00 : 1.84                  |                            |
|                                              | NVASLARTYTLPQNAa            | 27.49               | 4.77E+07       | 4.79E+07       | 4.99E+07       | 8.16E+07       | 8.31E+07       | 8.37E+07       | 4.85E+07      | 8.28E+07      | 1.00 : 1.71                  | Amidation                  |
| <b>PBAN-type neuropeptide (PBAN)</b>         | TSQDITSGMWFGPRLa            | 60                  | 2.38E+08       | 2.50E+08       | 2.47E+08       | 1.04E+09       | 1.02E+09       | 9.98E+08       | 2.45E+08      | 1.02E+09      | 1.00 : 4.16                  | Amidation                  |
|                                              | pQITQFTPRLa                 | 46.66               | 4.20E+07       | 4.55E+07       | 4.41E+07       | 8.50E+07       | 8.36E+07       | 8.38E+07       | 4.39E+07      | 8.41E+07      | 1.00 : 1.92                  | Pyro-glu from Q; Amidation |
| <b>Pigment-dispersing hormone (PDH)</b>      | NSELINSLGLPKNMNNAa          | 60                  | 3.02E+08       | 3.19E+08       | 3.18E+08       | 5.49E+07       | 5.67E+07       | 5.49E+07       | 3.13E+08      | 5.55E+07      | 1.00 : 0.18                  | Amidation                  |

|                                    |              |       |          |          |          |          |          |          |          |          |             |           |
|------------------------------------|--------------|-------|----------|----------|----------|----------|----------|----------|----------|----------|-------------|-----------|
| <b>Prohormone-4</b>                | IDLSRFYGHFNT | 39.91 | 6.23E+09 | 6.19E+09 | 6.34E+09 | 3.46E+09 | 3.50E+09 | 3.36E+09 | 6.25E+09 | 3.44E+09 | 1.00 : 0.55 |           |
| <b>Short neuropeptide F (sNPF)</b> | SPSLRLRFa    | 28.41 | 5.84E+06 | 5.43E+06 | 5.37E+06 | 1.11E+07 | 1.12E+07 | 1.23E+07 | 5.55E+06 | 1.15E+07 | 1.00 : 2.08 | Amidation |
| <b>Tachykinins (TK)</b>            | ALMGFQGVRa   | 60    | 9.80E+09 | 9.58E+09 | 9.57E+09 | 3.57E+09 | 3.63E+09 | 3.39E+09 | 9.65E+09 | 3.53E+09 | 1.00 : 0.37 | Amidation |
|                                    | APMGFQGMRa   | 55.7  | 9.93E+09 | 1.02E+10 | 9.93E+09 | 3.38E+09 | 3.27E+09 | 3.59E+09 | 1.00E+10 | 3.41E+09 | 1.00 : 0.34 | Amidation |



**Table S8. The proboscis extension response of workers after injection of ddH<sub>2</sub>O and TRP2.**

|                        | ddH <sub>2</sub> O |          |        |           | TRP2     |        |           |
|------------------------|--------------------|----------|--------|-----------|----------|--------|-----------|
|                        | Concentration      | Show PER | No PER | PER ratio | Show PER | No PER | PER ratio |
| <b>Pollen foragers</b> | 0.1%               | 19       | 36     | 34.55%    | 9        | 44     | 16.98%    |
|                        | 0.3%               | 21       | 34     | 38.18%    | 11       | 42     | 20.75%    |
|                        | 1.0%               | 30       | 25     | 54.55%    | 12       | 41     | 22.64%    |
|                        | 3.0%               | 36       | 19     | 65.45%    | 15       | 38     | 28.30%    |
|                        | 10.0%              | 38       | 17     | 69.09%    | 17       | 36     | 32.08%    |
|                        | 30.0%              | 48       | 7      | 87.27%    | 25       | 28     | 47.17%    |
|                        | Pollen             | 22       | 34     | 39.29%    | 9        | 44     | 16.98%    |
|                        | Larva              | 11       | 45     | 19.64%    | 12       | 41     | 22.64%    |

|                        | ddH <sub>2</sub> O |          |        |           | TRP2     |        |           |
|------------------------|--------------------|----------|--------|-----------|----------|--------|-----------|
|                        | Concentration      | Show PER | No PER | PER ratio | Show PER | No PER | PER ratio |
| <b>Nectar foragers</b> | 0.1%               | 10       | 45     | 18.18%    | 6        | 52     | 10.34%    |
|                        | 0.3%               | 14       | 41     | 25.45%    | 6        | 52     | 10.34%    |
|                        | 1.0%               | 16       | 39     | 29.09%    | 7        | 51     | 12.07%    |
|                        | 3.0%               | 19       | 36     | 34.55%    | 8        | 50     | 13.79%    |
|                        | 10.0%              | 25       | 30     | 45.45%    | 12       | 46     | 20.69%    |
|                        | 30.0%              | 29       | 26     | 52.73%    | 15       | 43     | 25.86%    |
|                        | Pollen             | 7        | 46     | 13.21%    | 8        | 44     | 15.38%    |
|                        | Larva              | 9        | 44     | 16.98%    | 6        | 46     | 11.54%    |

|                   | ddH <sub>2</sub> O |          |        |           | TRP2     |        |           |
|-------------------|--------------------|----------|--------|-----------|----------|--------|-----------|
|                   | Concentration      | Show PER | No PER | PER ratio | Show PER | No PER | PER ratio |
| <b>Nurse bees</b> | 0.1%               | 12       | 41     | 22.64%    | 8        | 44     | 15.38%    |
|                   | 0.3%               | 13       | 40     | 24.53%    | 10       | 42     | 19.23%    |
|                   | 1.0%               | 18       | 35     | 33.96%    | 13       | 39     | 25.00%    |
|                   | 3.0%               | 19       | 34     | 35.85%    | 16       | 36     | 30.77%    |
|                   | 10.0%              | 22       | 31     | 41.51%    | 21       | 31     | 40.38%    |
|                   | 30.0%              | 29       | 24     | 54.72%    | 25       | 27     | 48.08%    |
|                   | Pollen             | 5        | 50     | 9.09%     | 7        | 48     | 12.73%    |
|                   | Larva              | 21       | 32     | 39.62%    | 10       | 45     | 18.18%    |

**Table S9. The proboscis extension response of workers after injection of dsGFP, dsTRP, and dsTRPR.**

|                        | <i>dsGFP</i>  |          |        | <i>dsTRP</i> |          |        | <i>dsTRPR</i> |          |        |           |
|------------------------|---------------|----------|--------|--------------|----------|--------|---------------|----------|--------|-----------|
|                        | Concentration | Show PER | No PER | PER ratio    | Show PER | No PER | PER ratio     | Show PER | No PER | PER ratio |
| <b>Pollen foragers</b> | 0.1%          | 20       | 36     | 35.71%       | 30       | 24     | 55.56%        | 33       | 23     | 58.93%    |
|                        | 0.3%          | 22       | 34     | 39.29%       | 33       | 21     | 61.11%        | 35       | 21     | 62.50%    |
|                        | 1.0%          | 30       | 26     | 53.57%       | 40       | 14     | 74.07%        | 41       | 15     | 73.21%    |
|                        | 3.0%          | 37       | 19     | 66.07%       | 41       | 13     | 75.93%        | 43       | 13     | 76.79%    |
|                        | 10.0%         | 38       | 18     | 67.86%       | 45       | 9      | 83.33%        | 46       | 10     | 82.14%    |
|                        | 30.0%         | 49       | 7      | 87.50%       | 51       | 3      | 94.44%        | 49       | 7      | 87.50%    |
|                        | Pollen        | 19       | 33     | 36.54%       | 32       | 20     | 61.54%        | 33       | 21     | 61.11%    |
| Larva                  | 10            | 42       | 19.23% | 13           | 39       | 25.00% | 12            | 42       | 22.22% |           |

  

|                        | <i>dsGFP</i>  |          |        | <i>dsTRP</i> |          |        | <i>dsTRPR</i> |          |        |           |
|------------------------|---------------|----------|--------|--------------|----------|--------|---------------|----------|--------|-----------|
|                        | Concentration | Show PER | No PER | PER ratio    | Show PER | No PER | PER ratio     | Show PER | No PER | PER ratio |
| <b>Nectar foragers</b> | 0.1%          | 9        | 44     | 16.98%       | 17       | 33     | 34.00%        | 19       | 34     | 35.85%    |
|                        | 0.3%          | 12       | 41     | 22.64%       | 22       | 28     | 44.00%        | 22       | 31     | 41.51%    |
|                        | 1.0%          | 15       | 38     | 28.30%       | 27       | 23     | 54.00%        | 28       | 25     | 52.83%    |
|                        | 3.0%          | 18       | 35     | 33.96%       | 29       | 21     | 58.00%        | 32       | 21     | 60.38%    |
|                        | 10.0%         | 24       | 29     | 45.28%       | 31       | 19     | 62.00%        | 33       | 20     | 62.26%    |
|                        | 30.0%         | 28       | 25     | 52.83%       | 34       | 16     | 68.00%        | 38       | 16     | 70.37%    |
|                        | Pollen        | 7        | 49     | 12.50%       | 13       | 42     | 23.64%        | 11       | 44     | 20.00%    |
| Larva                  | 10            | 46       | 17.86% | 11           | 44       | 20.00% | 12            | 43       | 21.82% |           |

|            | <i>dsGFP</i>  |             |           | <i>dsTRP</i> |             |           | <i>dsTRPR</i> |          |        |           |
|------------|---------------|-------------|-----------|--------------|-------------|-----------|---------------|----------|--------|-----------|
|            | Concentration | Show<br>PER | No<br>PER | PER<br>ratio | Show<br>PER | No<br>PER | PER<br>ratio  | Show PER | No PER | PER ratio |
| Nurse bees | 0.1%          | 12          | 43        | 21.82%       | 8           | 45        | 15.09%        | 9        | 46     | 16.36%    |
|            | 0.3%          | 13          | 42        | 23.64%       | 8           | 45        | 15.09%        | 13       | 42     | 23.64%    |
|            | 1.0%          | 18          | 37        | 32.73%       | 14          | 39        | 26.42%        | 16       | 39     | 29.09%    |
|            | 3.0%          | 20          | 35        | 36.36%       | 23          | 30        | 43.40%        | 25       | 30     | 45.45%    |
|            | 10.0%         | 23          | 32        | 41.82%       | 29          | 24        | 54.72%        | 27       | 28     | 49.09%    |
|            | 30.0%         | 30          | 25        | 54.55%       | 31          | 22        | 58.49%        | 33       | 22     | 60.00%    |
|            | Pollen        | 6           | 50        | 10.71%       | 13          | 41        | 24.07%        | 12       | 43     | 21.82%    |
|            | Larva         | 21          | 35        | 37.50%       | 31          | 23        | 57.41%        | 32       | 23     | 58.18%    |

**Table S10. Statistical differences in sucrose responsiveness after injection of dsGFP, dsTRP, and dsTRPR.**

| <b>Concentration</b>          | <b>0.10%</b> | <b>0.30%</b> | <b>1.00%</b> | <b>3.00%</b> | <b>10.00%</b> | <b>30.00%</b> |
|-------------------------------|--------------|--------------|--------------|--------------|---------------|---------------|
| <b>Pollen foragers</b>        |              |              |              |              |               |               |
| <i>dsTRP</i> vs <i>dsGFP</i>  | *            | *            | *            | ns           | ns            | ns            |
| <i>dsTRPR</i> vs <i>dsGFP</i> | *            | *            | *            | ns           | ns            | ns            |
| <i>dsTRP</i> vs <i>dsTRPR</i> | ns           | ns           | ns           | ns           | ns            | ns            |
| <b>Nectar foragers</b>        |              |              |              |              |               |               |
| <i>dsTRP</i> vs <i>dsGFP</i>  | *            | *            | **           | *            | ns            | ns            |
| <i>dsTRPR</i> vs <i>dsGFP</i> | *            | *            | *            | **           | ns            | ns            |
| <i>dsTRP</i> vs <i>dsTRPR</i> | ns           | ns           | ns           | ns           | ns            | ns            |
| <b>Nurse bees</b>             |              |              |              |              |               |               |
| <i>dsTRP</i> vs <i>dsGFP</i>  | ns           | ns           | ns           | ns           | ns            | ns            |
| <i>dsTRPR</i> vs <i>dsGFP</i> | ns           | ns           | ns           | ns           | ns            | ns            |
| <i>dsTRP</i> vs <i>dsTRPR</i> | ns           | ns           | ns           | ns           | ns            | ns            |

ns = P > 0.05, \*P < 0.05, \*\*P < 0.01

**Table S11. Sequence information of primers used in this study.**

| Gene name                                           | Forward primer (5'-3')                       | Reverse primer (5'-3')                       |
|-----------------------------------------------------|----------------------------------------------|----------------------------------------------|
| <i>TRPR</i> clone (for FLAG-tag expression vectors) | AAGCTTAAGCTTATGCAGACCGTAGAAGTTTTTCTAAC       | GGATCCTCAAGACACGTGACCCGTAGTTTGCGA            |
| <i>TRPR</i> clone (for EGFP-tag expression vectors) | AAGCTTGCCACCATGCAGACCGTAGAAGTTTTTCTAAC       | GGATCCAGACACGTGACCCGTAGTTTGCGA               |
| <i>TRPR</i> RNAi                                    | TAATACGACTCACTATAGGGGAGCAAACGAAGGGTGGTAA     | TAATACGACTCACTATAGGGCGCGTCGAAATCTGGAGT       |
| <i>TRPR</i> qPCR                                    | GAGCAAACGAAGGGTGGTAA                         | ACTCCAGATTTTCGACGCG                          |
| <i>TRP</i> RNAi                                     | TAATACGACTCACTATAGGGGGTGTGCGTGGAAGAAAA       | TAATACGACTCACTATAGGGTTTGATATCCATCCATCGACAA   |
| <i>TRP</i> qPCR                                     | GTTATCAAGATATGAGGAAT                         | ATGGATTAGAAGACAGTT                           |
| <i>GFP</i> RNAi                                     | TAATACGACTCACTATAGGGAGTGGAGAGGGTGAA<br>GGTGA | TAATACGACTCACTATAGGGGGTAAAAGGACAG<br>GGCCATC |

Red font indicates T7 promoter sequence.
